# Supplementary material for: Redox transformation of β-sulfinyl esters for asymmetric synthesis of sulfone-based axially chiral styrenes
Source: Royal Society of Chemistry journal article supplement (doi:10.1039/d3qo00932g), 2023-01-01
Supplement: d3qo00932g1.pdf [file d3qo00932g1.pdf]

*Supporting Information For:*

**Redox Transformation of  $\beta$ -Sulfinyl Esters for Asymmetric Synthesis of Sulfone-Based Axially Chiral Styrenes**

Shiyu Xiang, Taotao Lu, Junjun Liu, Qingyang Zhao\*<sup>a</sup>

*School of Pharmaceutical Sciences (Shenzhen), Shenzhen Campus of Sun Yat-sen University, Shenzhen, 518107, China*

*zhaoqy26@mail.sysu.edu.cn*

**CONTENT**

|                                                                                  |           |
|----------------------------------------------------------------------------------|-----------|
| <b>1. General information.</b> .....                                             | <b>2</b>  |
| <b>2. Substrate synthesis.</b> .....                                             | <b>3</b>  |
| <b>3. Experimental procedures.</b> .....                                         | <b>8</b>  |
| <b>4. General procedure for scale-up reaction and control experiments.</b> ..... | <b>12</b> |
| <b>5. <sup>1</sup>H, <sup>13</sup>C NMR and HRMS data of compound 2g'.</b> ..... | <b>17</b> |
| <b>6. Spectroscopic Data and HPLC of products.</b> .....                         | <b>18</b> |
| <b>7. X-ray crystal structures.</b> .....                                        | <b>48</b> |
| <b>8. Copies of NMR Spectra.</b> .....                                           | <b>51</b> |
| <b>9. References.</b> .....                                                      | <b>86</b> |

## 1. General information.

Unless otherwise stated, all reagents and solvents were purchased from commercial suppliers (Energy-chemical, TCI, Bidepharm, Adamas, innochem *et al.*), and used without further purification. All reactions were carried out under an atmosphere of nitrogen using a glovebox.

Reaction progresses were monitored by analytical thin layer chromatography (TLC) (TLC-Silica gel GF254 from Xinnuo). The TLC was visualized with a UV lamp (254 or 365 nm). Flash Column chromatography was carried out on silica gel (60 Å, 200-300 mesh) with technical grade solvents as the eluent. <sup>1</sup>H and <sup>13</sup>C NMR spectra were recorded on Bruker instrument Advance 400 or 600 and referenced internally to the residual proton resonance in CDCl<sub>3</sub> (δ 7.26 ppm), or with tetramethylsilane (TMS, δ 0.00 ppm) as the internal standard. Chemical shifts (δ) were reported as part per million (ppm) in δ scale downfield from TMS. The following abbreviations (or combinations thereof) were used to explain multiplicities: s = singlet, d = doublet, t = triplet, q = quartet, m = multiplet, b = broad. Coupling constants *J* were reported in Hertz unit (Hz). Optical rotations were measured with a IP-digi300/1 automatic polarimeter purchased from Shanghai InsMark Instrument Technology Co., Ltd. using LED (λ = 589 nm) in the indicated solvent at the indicated temperature. The measurements were carried out in a 0.8 mL cell (50 mm length) with concentrations (10 mg/mL) reported in the corresponding solvent. The optical rotation values were reported as follows: [α]<sub>D</sub><sup>20</sup> (c = 10 mg/mL in CHCl<sub>3</sub>).

HRMS were recorded on a Liquid chromatography quadrupole orbital trap mass spectrometer (Quadrupole-Orbitrap LC-MS, ThermoFisher) using Electron Spray Ionization (ESI). HPLC analysis was performed on an Waters e2695 Series and Shimadzu LC-2030C Plus using Chiralpak columns AD-H (Daicel Chiral Reagent Company). The solvents (n-hexane and iso-propanol, HPLC-grade) used as the eluent were purchased from Energy-chemical. The column type and the eluent (a mixture of n-hexane and iso-propanol) are indicated for each experiment. X-ray crystallography was performed on a Supernova diffractometer.

## 2. Substrate synthesis.

Compounds **1a-1q** were synthesized according to the reference.<sup>1-4</sup>

### Method A: (1a-1e, 1g-1q)

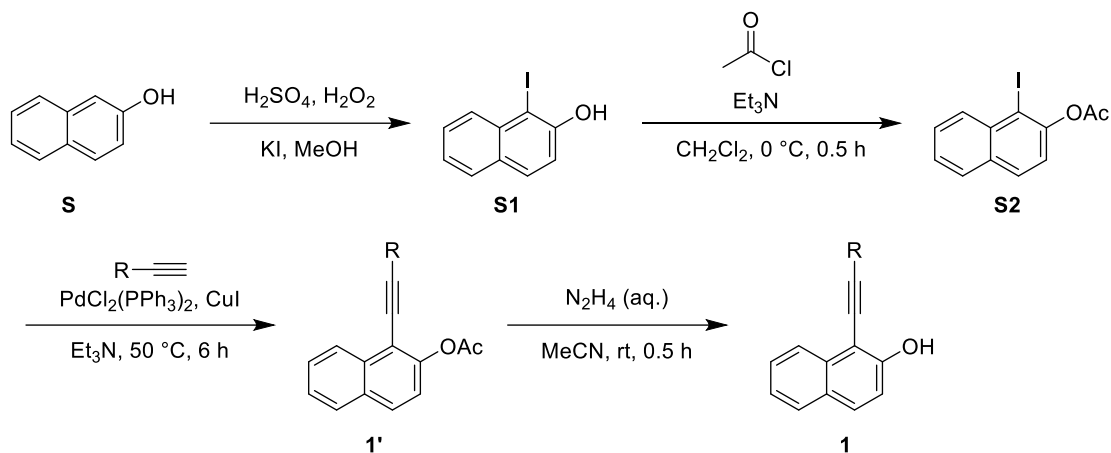

Sulfuric acid (75.0 mmol) was added to a solution of 2-naphthol (7.2 g, 50.0 mmol) and potassium iodide (8.3 g, 50 mmol) in methanol (150 mL) at 0 °C. A precipitate formed, and hydrogen peroxide (30% aqueous solution, 100 mmol) was added. After 1.5 h of warming slowly to room temperature, the mixture was filtered, and the filtrate was concentrated. The residue was dissolved in CH<sub>2</sub>Cl<sub>2</sub>, washed with 25% sat.aq. Na<sub>2</sub>S<sub>2</sub>O<sub>3</sub> and water, dried over Na<sub>2</sub>SO<sub>4</sub>. Then, the mixture was filtrated and the filtrate was concentrated. The material was purified by flash chromatography (PE:EA = 50:1) to provide a white solid **S1** (12.1 g, 90% yield).

Acetyl chloride (1.5 equiv.) was dropwise added to a solution of **S1** (9.8 g, 36.3 mmol) and Et<sub>3</sub>N (10.1 mL, 72.6 mmol) in CH<sub>2</sub>Cl<sub>2</sub> (90 mL) at 0 °C under N<sub>2</sub>. The reaction mixture was stirred at 0 °C for 30 min and then quenched with sat. aq. NH<sub>4</sub>Cl followed by extraction with CH<sub>2</sub>Cl<sub>2</sub>. The organic phase was washed with brine and dried over Na<sub>2</sub>SO<sub>4</sub>, and the solvent was removed under vacuum. The crude product was purified by column chromatography on silica gel (PE:EA = 20:1) to afford **S2** (11.3 g, 99% yield).

To a dry flask under N<sub>2</sub> containing **S2** (2.0 mmol) was sequentially added Et<sub>3</sub>N (4 mL), appropriate alkynes (2.2 mmol), PdCl<sub>2</sub>(PPh<sub>3</sub>)<sub>2</sub> (28.0 mg, 0.04 mmol), CuI (19.0 mg, 0.1 mmol). The mixture was stirred for 6 h at 50 °C. Then the mixture was filtered through a pad of celite. Removal of solvent under reduced pressure afforded a residue which is purified by column chromatography on silica gel (PE:EA = 30:1 to 10:1) to afford **1'**.

Hydrazine monohydrate (5.0 mmol) was dropwise added to a solution of **1'** (1.0 mmol) in CH<sub>3</sub>CN (5 mL). The mixture was stirred at room temperature for 0.5 h and then treated with sat. aq. NH<sub>4</sub>Cl and extracted with CH<sub>2</sub>Cl<sub>2</sub>. The organic phase was dried over Na<sub>2</sub>SO<sub>4</sub>. Removal of solvent under reduced pressure afforded a residue

which is purified by column chromatography on silica gel (PE:EA = 30:1 to 10:1) to afford the compound **1**.

**Method B: (1f)**

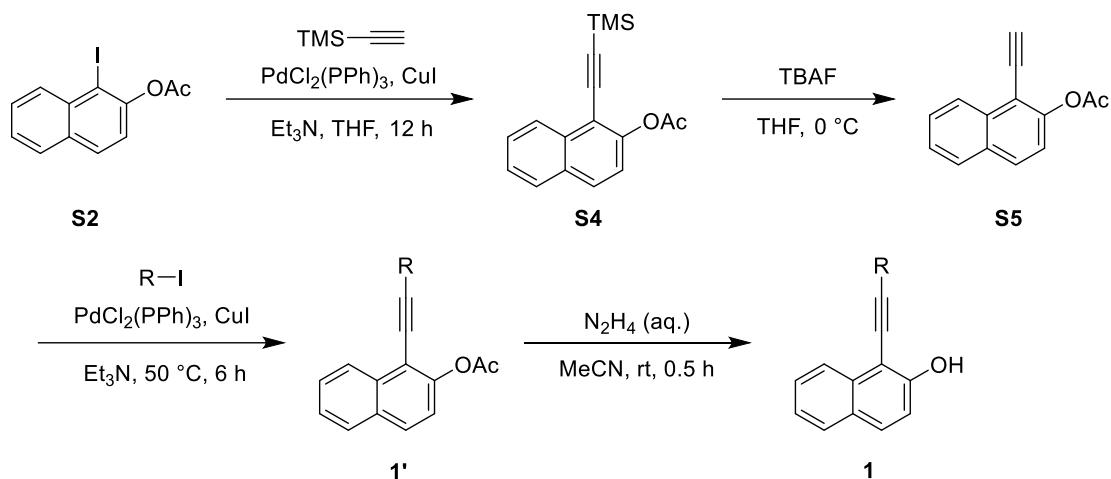

Trimethylsilylacetylene (2.7 mL, 19.5 mmol) was dropwise added to a solution of **S2** (4.7 g, 15.0 mmol), PdCl<sub>2</sub>(PPh<sub>3</sub>)<sub>2</sub> (210 mg, 0.3 mmol), CuI (142 mg, 0.75 mmol) and Et<sub>3</sub>N (6.2 mL, 45.0 mmol) in THF (40 mL) at room temperature under N<sub>2</sub>. Then, the mixture was stirred for 12 h. The reaction mixture was treated with sat. aq. NH<sub>4</sub>Cl followed by extraction with CH<sub>2</sub>Cl<sub>2</sub>. The combined organic layer was washed with brine, dried over Na<sub>2</sub>SO<sub>4</sub>. Removal of solvent under reduced pressure afforded a residue which is purified by column chromatography on silica gel (PE:EA = 30:1) to afford **S4** (2.5 g, 80% yield).

To a solution of **S4** (2.5 g, 12.0 mmol) in THF (50 mL) was added TBAF in THF (1 M, 10.2 mL, 10.2 mmol) dropwise at 0 °C under N<sub>2</sub>. Then the mixture was stirred for 1 h. The reaction mixture was treated with sat. aq. NH<sub>4</sub>Cl followed by extraction with CH<sub>2</sub>Cl<sub>2</sub>. The combined organic layer was washed with brine, dried over Na<sub>2</sub>SO<sub>4</sub>, and concentrated in vacuo. The crude product was purified by column chromatography on silica gel (PE:EA = 100:1) to afford **S5** (1.9 g, 75% yield).

To a dry flask under N<sub>2</sub> containing the appropriate iodebenzenes (2.0 mmol) was sequentially added Et<sub>3</sub>N (5.0 mL), **S5** (462 mg, 2.2 mmol), PdCl<sub>2</sub>(PPh<sub>3</sub>)<sub>2</sub> (28.0 mg, 0.04 mmol) and CuI (19.0 mg, 0.1 mmol). The mixture was stirred for 6 h at 50 °C. Then the mixture was filtered through a pad of celite. Removal of solvent under reduced pressure afforded a residue which is purified by column chromatography on silica gel (PE:EA = 20:1) to afford **1'**.

Hydrazine monohydrate (5.0 mmol) was dropwise added to a solution of **1'** (1.0 mmol) in CH<sub>3</sub>CN (5 mL). The mixture was stirred at room temperature for 0.5 h and then treated with sat. aq. NH<sub>4</sub>Cl and extracted with CH<sub>2</sub>Cl<sub>2</sub>. The organic phase was dried over Na<sub>2</sub>SO<sub>4</sub>. Removal of solvent under reduced pressure afforded a residue which is purified by column chromatography on silica gel (PE:EA = 10:1) to afford the compound **1**.

Compounds **2a** was synthesized according to the reference.<sup>5, 6</sup>

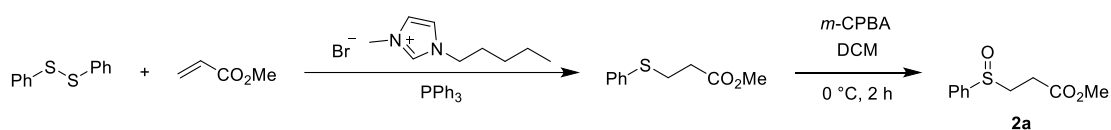

A mixture of methyl acrylate (16.7 mmol), diphenyl disulfide (10.0 mmol), PPh<sub>3</sub> (11.7 mmol), and 1-methyl-3-pentyl-1H-imidazol-3-ium Bromide (6.7 mmol) was stirred at 75 °C for 5 h (monitored by TLC). The reaction mixture was extracted with Et<sub>2</sub>O, and the organic layer was washed with brine and dried (Na<sub>2</sub>SO<sub>4</sub>). Evaporation of solvent left the crude product which was purified by column chromatography over silica gel (PE:EA = 30:1) to afford the sulfide (1.57 g, 80% yield) as a colorless liquid.

The sulfide (8 mmol) was dissolved in DCM (20 mL) and treated with *m*-CPBA (1.0 equiv., dissolved in 20 mL DCM) under 0 °C. Upon completion, the reaction mixture was quenched with sat. aq. NaHCO<sub>3</sub> and the aqueous mixture was extracted with DCM. The combined the organic layer was dried over Na<sub>2</sub>SO<sub>4</sub>, filtered and the solvent was removed under vacuum. Purified by flash chromatography on silica gel (PE:EA = 3:1) to afforded products **2a** (1.63 g, 96% yield).

Compounds **2b-2g** were synthesized according to the reference.<sup>6</sup>

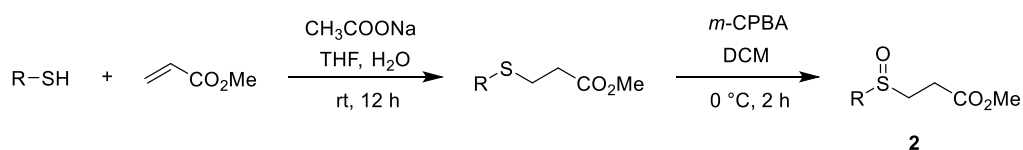

A 100 mL round bottom flask was charged with thiol (20.0 mmol, 1.0 equiv.), methyl acrylate (2.0 mL, 1.1 equiv.), THF (20 mL), H<sub>2</sub>O (30 mL) and sodium acetate (246 mg, 15 mol%). The mixture was stirred at room temperature for 24 h. Upon completion, the reaction mixture was poured into saturated aq. NaHCO<sub>3</sub> and the aqueous mixture was extracted with ethyl acetate. The combined organic layer was dried over Na<sub>2</sub>SO<sub>4</sub>, filtered and the solvent was removed under vacuum. Purified by chromatography on silica gel (PE:EA = 30:1 to 10:1) to give product sulfide.

The sulfide (20 mmol) was dissolved in DCM (50 mL) and treated with *m*-CPBA (1.0 equiv., dissolved in 50 mL DCM) under 0 °C. Upon completion, the reaction mixture was quenched with sat. aq. NaHCO<sub>3</sub> and the aqueous mixture was extracted with DCM. The combined the organic layer was dried over Na<sub>2</sub>SO<sub>4</sub>, filtered and the solvent was removed under vacuum. Purified by flash chromatography on silica gel (PE:EA = 3:1 to 1:1) to afforded products **2b-2g**.

Compounds **2h** were synthesized according to the reference.<sup>7</sup>

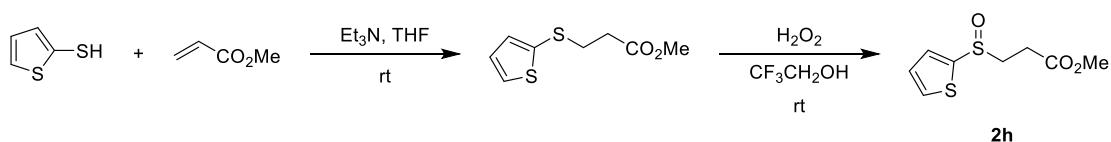

Et<sub>3</sub>N (5 mol%) was added to a solution of thiol (10.0 mmol) and methyl acrylate (10.0 mmol) in THF (2 mL) at 0 °C. The resulting reaction mixture was stirred for appropriate time at room temperature (monitored by TLC). After removing solvent under reduced pressure, the crude residue was used in next step without further purification.

To a 2 M solution of sulfide (5.0 mmol) in 2,2,2-trifluoroethanol (TFE) (5.0 mL) at 0 °C, H<sub>2</sub>O<sub>2</sub> (30% aqueous solution, 1.8 equiv.) was added dropwise. The reaction mixture was allowed to warm to room temperature and stirred for appropriate time (monitored by TLC). Solid sodium sulfite (1.8 equiv.) was added then the reaction mixture was stirred for 30 min. The resulting mixture was filtered on celite, dried over Na<sub>2</sub>SO<sub>4</sub>, filtered and evaporated under reduced pressure. The crude product was then purified by column chromatography on silica gel (PE:EA = 2:1) to afford the product **2h** (1.64 g, 75% yield).

Compounds **2g'** were synthesized according to the reference.<sup>8</sup>

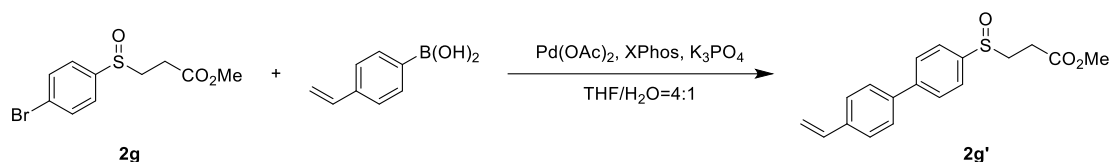

In an N<sub>2</sub>-filled glove box, to a 50 mL Schlenk tube was charged sequentially Pd(OAc)<sub>2</sub> (0.12 mmol), XPhos (0.12 mmol), **2g** (1.0 mmol), 4-vinylphenylboronic acid (1.2 mmol), and 18 mL of THF. The mixture was stirred at 25 °C for 15 min, and then a solution of K<sub>3</sub>PO<sub>4</sub> (2.0 mmol) in 4.5 mL of degassed H<sub>2</sub>O was added to initiate the Suzuki reaction. The Schlenk tube was capped tightly and the reaction mixture was stirred vigorously at 25 °C for 12 h. The reaction mixture was extracted with ethyl acetate. The combined organic layer was dried over Na<sub>2</sub>SO<sub>4</sub>, filtered concentrated on a rotary evaporator. The resulting residue was purified by silica gel (PE:EA = 2:1) to provide the product **2g'** (166.0 mg, 53% yield).

Compounds **2a'** were synthesized according to the reference.<sup>9</sup>

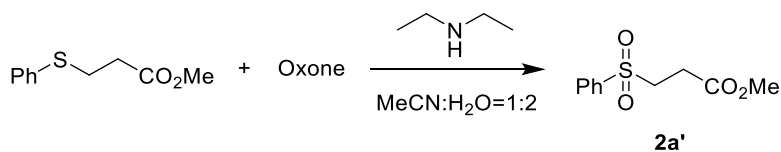

To a well-stirred solution of sulfide (1.0 mmol) and diethylamine (0.2 mmol) in acetonitrile (2 mL) was added the solution of Oxone (1.5 mmol) in water (4 mL). Upon completion of the reaction, the mixture was diluted with chilled water. The product was extracted with ethyl acetate. The organic extract was washed with water, dried over Na<sub>2</sub>SO<sub>4</sub>, and the solvent was removed. The resultant residue on filtration through a short column of silica gel (PE:EA = 3:1) afforded the compound **2a'** (160.1 mg, 70% yield).

Compounds **4** were synthesized according to the reference.<sup>10</sup>

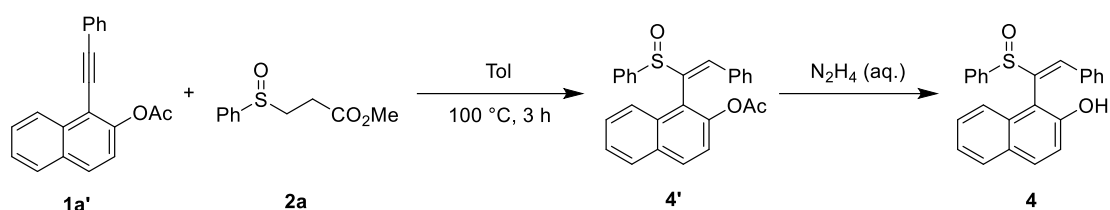

A flame-dried reaction tube equipped with a magnetic stirring bar was charged with  $\beta$ -sulfinyl ester derivative **2a** (3 mmol, 1 equiv.) and alkyne **1a'** (9 mmol, 3 equiv.) in toluene (15 mL). The mixture was stirred at 100 °C for 3 h. The solvent was evaporated under reduced pressure, and the crude reaction mixture was purified by silica gel column chromatography using PE/EA (4:1) as eluent and afforded the **4'** (210.4 mg, 17% yield).

Hydrazine monohydrate (2.5 mmol) was dropwise added to a solution of **4'** (0.51 mmol) in  $\text{CH}_3\text{CN}$  (2.5 mL). The mixture was stirred at room temperature for 0.5 h and then treated with sat. aq.  $\text{NH}_4\text{Cl}$  and extracted with  $\text{CH}_2\text{Cl}_2$ . The organic phase was dried over  $\text{Na}_2\text{SO}_4$ . Removal of solvent under reduced pressure afforded a residue which is purified by column chromatography on silica gel (PE:EA = 1:1) to afford the compound **4** (107.9 mg, 57% yield).

Compounds **5** were synthesized according to the reference.<sup>11</sup>

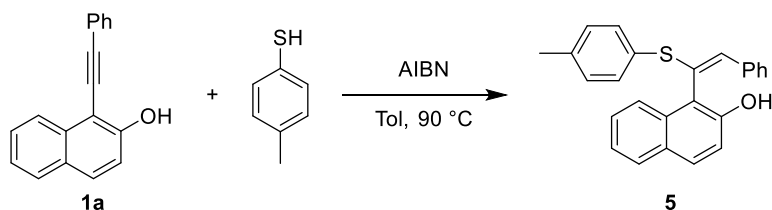

A flame-dried reaction tube equipped with a magnetic stirring bar was charged with the substrate **1a** (1.0 mmol), 4-methylthiophenol (1.0 mmol) and AIBN (0.35 mmol). Then toluene (1 mL) was injected into the tube. The mixture was stirred at 90 °C for 2 h. Removal of solvent under reduced pressure afforded a residue which is purified by chromatography on silica gel (PE:EA = 15:1) to afford **5** (203.0 mg, 55% yield).

### 3. Experimental procedures.

#### 3.1 General Procedure for conditions optimization (3aa).

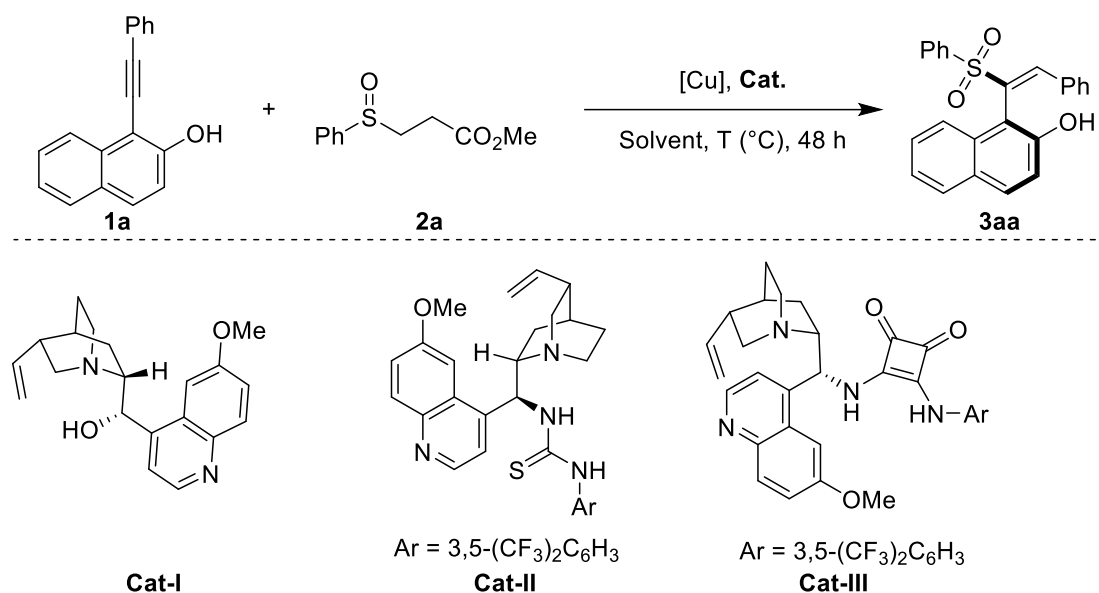

The substrate **1a** (0.1 mmol), CuI (10 mol%) and **Cat-III** (10 mol%) was added to a 10 mL Schlenk tube with a magnetic stirring bar. Charging with  $N_2$ , 2-Me-THF (1 mL) was injected into the tube followed by **2a** (0.5 mmol). The mixture was stirred at  $60^{\circ}C$  (oil bath) for 48 h. Removal of solvent under reduced pressure afforded a residue which is purified by chromatography on silica gel (PE:EA = 5:1) to afford **3aa**.

#### Supplementary Table 1. Screening of chiral ligands.

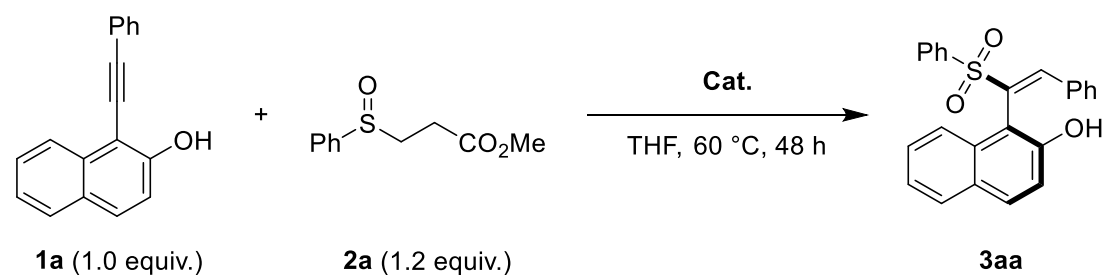

| entry <sup>a</sup> | T( $^{\circ}C$ ) | Cat.       | solvent | yield (%) <sup>b</sup> | ee (%) <sup>c</sup> |
|--------------------|------------------|------------|---------|------------------------|---------------------|
| 1                  | 60               | <b>I</b>   | THF     | ND                     | /                   |
| 2                  | 60               | <b>II</b>  | THF     | 40                     | -76                 |
| 3                  | 60               | <b>III</b> | THF     | 29                     | 92                  |

<sup>a</sup> Reaction conditions: **1a** (0.1 mmol), **2a** (0.12 mmol), and **Cat.** (10 mol%) in 1 mL THF at  $60^{\circ}C$  for 48 h under nitrogen. <sup>b</sup> isolated yield. <sup>c</sup> Determined by chiral HPLC analysis Chiralpak columns. ND: No Detected.



### Supplementary Table 2. Screening of metals.

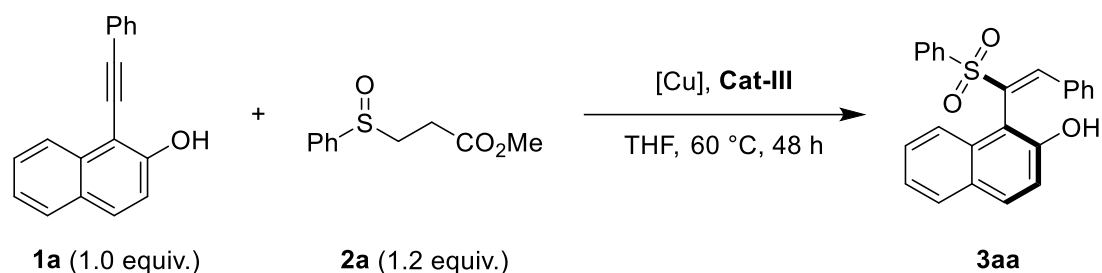

| entry <sup>a</sup> | T(°C) | Cat.       | M                     | solvent | yield (%) <sup>b</sup> | ee (%) <sup>c</sup> |
|--------------------|-------|------------|-----------------------|---------|------------------------|---------------------|
| 1                  | 60    | <b>III</b> | Cu(acac) <sub>2</sub> | THF     | 27                     | 96                  |
| 2                  | 60    | <b>III</b> | CuSCN                 | THF     | 25                     | 92                  |
| 3                  | 60    | <b>III</b> | CuO                   | THF     | 38                     | 93                  |
| 4                  | 60    | <b>III</b> | CuTc                  | THF     | 17                     | 89                  |
| 5                  | 60    | <b>III</b> | CuOAc                 | THF     | 11                     | 93                  |
| 6                  | 60    | <b>III</b> | CuOTf                 | THF     | 23                     | 96                  |
| 7                  | 60    | <b>III</b> | Cu <sub>2</sub> O     | THF     | 42                     | 94                  |
| 8                  | 60    | <b>III</b> | CuCl                  | THF     | 27                     | 94                  |
| 9                  | 60    | <b>III</b> | CuBr                  | THF     | 36                     | 94                  |
| 10                 | 60    | <b>III</b> | CuI                   | THF     | 44                     | 94                  |

<sup>a</sup> Reaction conditions: **1a** (0.1 mmol), **2a** (0.12 mmol), [M] (10 mol%) and **Cat-III** (10 mol%) in 1 mL THF at 60 °C for 48 h under nitrogen. <sup>b</sup> isolated yield. <sup>c</sup> Determined by chiral HPLC analysis Chiralpak columns.

### Supplementary Table 3. Screening of bases.

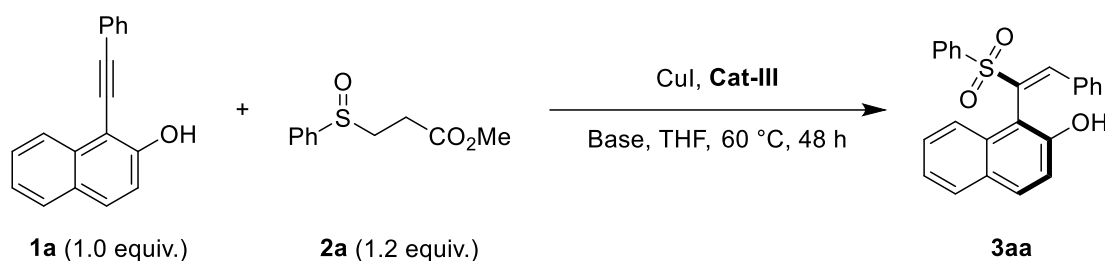

| entry <sup>a</sup> | T(°C) | Cat.       | M   | base                            | solvent | yield (%) <sup>b</sup> | ee (%) <sup>c</sup> |
|--------------------|-------|------------|-----|---------------------------------|---------|------------------------|---------------------|
| 1 <sup>d</sup>     | 25    | <b>III</b> | CuI | KOH                             | THF     | 33                     | race                |
| 2                  | 60    | <b>III</b> | CuI | ---                             | THF     | 44                     | 94                  |
| 3                  | 60    | <b>III</b> | CuI | Cs <sub>2</sub> CO <sub>3</sub> | THF     | Trace                  | /                   |
| 4                  | 60    | <b>III</b> | CuI | CsF                             | THF     | Trace                  | /                   |
| 5                  | 60    | <b>III</b> | CuI | K <sub>2</sub> CO <sub>3</sub>  | THF     | Trace                  | /                   |
| 6                  | 60    | <b>III</b> | CuI | K <sub>3</sub> PO <sub>4</sub>  | THF     | Trace                  | /                   |
| 7                  | 60    | <b>III</b> | CuI | KOH                             | THF     | ND                     | /                   |
| 8                  | 60    | <b>III</b> | CuI | KF                              | THF     | 29                     | 68                  |
| 9                  | 60    | <b>III</b> | CuI | NaOAc                           | THF     | 40                     | 91                  |
| 10                 | 60    | <b>III</b> | CuI | t-BuOK                          | THF     | ND                     | /                   |
| 11                 | 60    | <b>III</b> | CuI | Et <sub>3</sub> N               | THF     | 31                     | 89                  |

<sup>a</sup> Reaction conditions: **1a** (0.1 mmol), **2a** (0.12 mmol), CuI (10 mol%), **Cat-III** (10 mol%) and base (0.1 mmol) in 1 mL THF at 60 °C for 48 h under nitrogen. <sup>b</sup> isolated

yield. <sup>c</sup> Determined by chiral HPLC analysis Chiralpak columns. <sup>d</sup> Reaction temperature is 25 °C. ND: No Detected.

#### Supplementary Table 4. Screening of solvents.

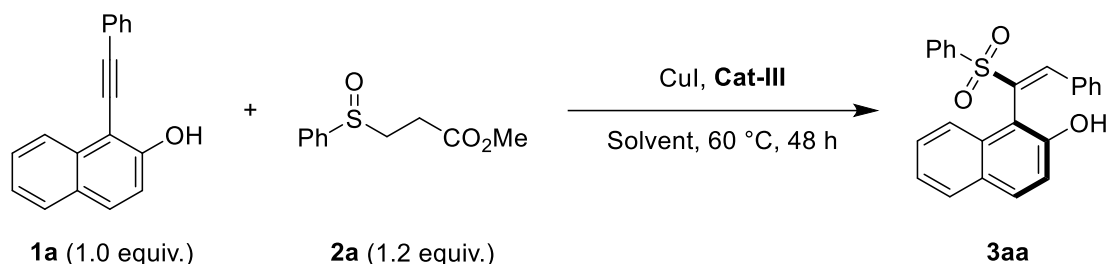

| entry <sup>a</sup> | T(°C) | Cat.       | M   | solvent     | yield (%) <sup>b</sup> | ee (%) <sup>c</sup> |
|--------------------|-------|------------|-----|-------------|------------------------|---------------------|
| 1                  | 60    | <b>III</b> | --- | THF         | 29                     | 92                  |
| 2                  | 60    | <b>III</b> | --- | Tol         | 15                     | 90                  |
| 3                  | 60    | <b>III</b> | --- | MeCN        | 19                     | 89                  |
| 4                  | 60    | <b>III</b> | --- | 1,4-Dioxane | 18                     | 91                  |
| 5                  | 60    | <b>III</b> | CuI | DIPE        | 46                     | 93                  |
| 6                  | 60    | <b>III</b> | CuI | DME         | 46                     | 93                  |
| 7                  | 60    | <b>III</b> | CuI | MTBE        | 49                     | 92                  |
| 8                  | 60    | <b>III</b> | CuI | 2-Me-THF    | 57                     | 93                  |
| 9 <sup>d</sup>     | 60    | <b>III</b> | CuI | THF         | 75                     | 98                  |
| 10 <sup>d</sup>    | 60    | <b>III</b> | CuI | 2-Me-THF    | 88                     | 97                  |

<sup>a</sup> Reaction conditions: **1a** (0.1 mmol), **2a** (0.12 mmol), CuI (10 mol%), and **Cat-III** (10 mol%) in 1 mL solvent at 60 °C for 48 h under nitrogen. <sup>b</sup> isolated yield. <sup>c</sup> Determined by chiral HPLC analysis Chiralpak columns. <sup>d</sup> **1a:2a** = 1:5. DIPE = Diisopropyl Ether; DME = 1,2-Dimethoxyethane; MTBE = *tert*-Butyl Methyl Ether.

#### Supplementary Table 5. Screening of substrate ratios.

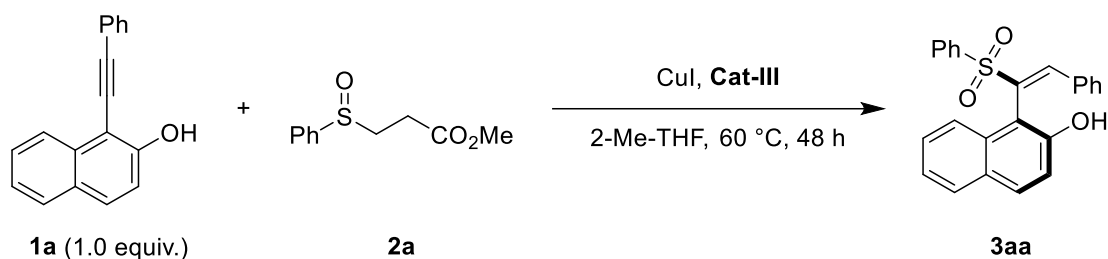

| entry <sup>a</sup> | T(°C) | Cat.       | M   | <b>2a:1a</b> | solvent  | yield (%) <sup>b</sup> | ee (%) <sup>c</sup> |
|--------------------|-------|------------|-----|--------------|----------|------------------------|---------------------|
| 1                  | 60    | <b>III</b> | CuI | 1.2          | 2-Me-THF | 57                     | 93                  |
| 2                  | 60    | <b>III</b> | CuI | 3            | 2-Me-THF | 74                     | 96                  |
| 3                  | 60    | <b>III</b> | CuI | 4            | 2-Me-THF | 81                     | 96                  |
| 4                  | 60    | <b>III</b> | CuI | 5            | 2-Me-THF | 88                     | 97                  |
| 5 <sup>d</sup>     | 60    | <b>III</b> | CuI | 5            | 2-Me-THF | 83                     | 97                  |

<sup>a</sup> Reaction conditions: **1a** (0.1 mmol), **2a**, CuI (10 mol%), and **Cat-III** (10 mol%) in 1 mL solvent at 60 °C for 48 h under nitrogen. <sup>b</sup> isolated yield. <sup>c</sup> Determined by chiral HPLC analysis Chiralpak columns. <sup>d</sup> 0.2 mmol **1a** was used.

## Supplementary Table 6. Screening of temperature.

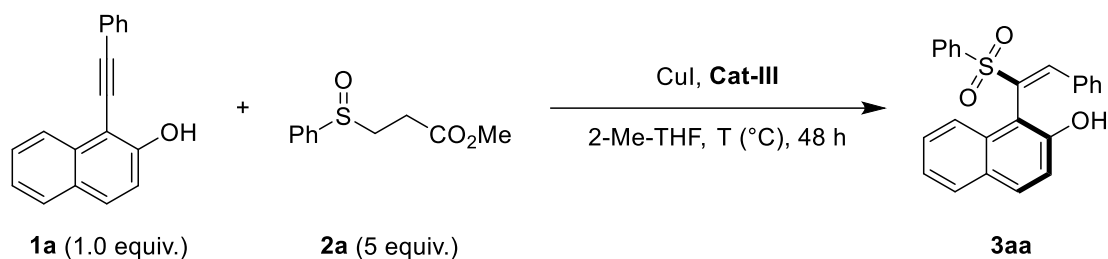

| entry <sup>a</sup> | T(°C) | Cat.       | M   | solvent  | yield (%) <sup>b</sup> | ee (%) <sup>c</sup> |
|--------------------|-------|------------|-----|----------|------------------------|---------------------|
| 1                  | 50    | <b>III</b> | CuI | 2-Me-THF | 80                     | 97                  |
| 2                  | 60    | <b>III</b> | CuI | 2-Me-THF | 88                     | 97                  |
| 3                  | 70    | <b>III</b> | CuI | 2-Me-THF | 73                     | 97                  |
| 4                  | 80    | <b>III</b> | CuI | 2-Me-THF | 66                     | 92                  |

<sup>a</sup> Reaction conditions: **1a** (0.1 mmol), **2a** (0.5 mmol), CuI (10 mol%), and **Cat-III** (10 mol%) in 1 mL 2-Me-THF at reaction temperature for 48 h under nitrogen. <sup>b</sup> isolated yield. <sup>c</sup> Determined by chiral HPLC analysis Chiralpak columns.

### 3.2 General procedure for asymmetric reaction.

#### General procedure

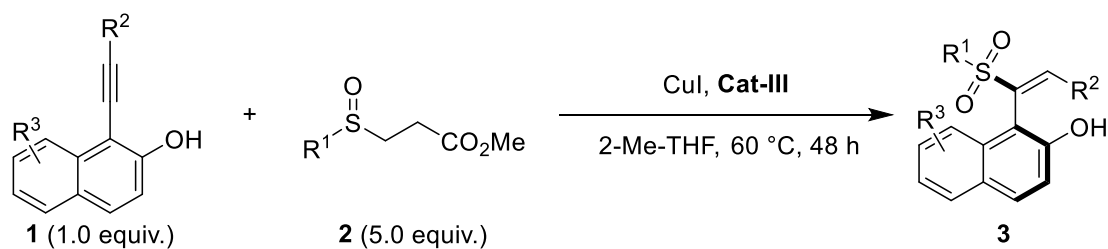

The substrate **1** (0.2 mmol), CuI (10 mol%) and **Cat-III** (10 mol%) was added to a 10 mL Schlenk tube with a magnetic stirring bar. Charging with N<sub>2</sub>, 2-Me-THF (2 mL) was injected into the tube followed by **2** (1.0 mmol). The mixture was stirred at 60 °C for 48 h. Removal of solvent under reduced pressure afforded a residue which is purified by chromatography on silica gel (PE:EA = 5:1) to afford **3**.

## 4. General procedure for scale-up reaction and control experiments.

### 4.1 General procedure for scale-up reaction.

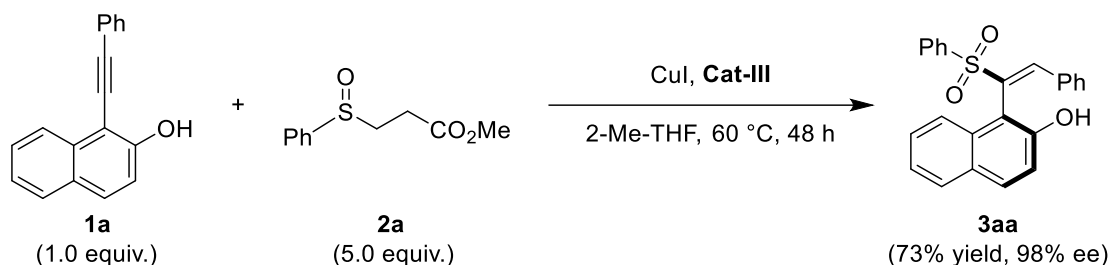

The substrate **1a** (1.0 mmol), CuI (10 mol%) and **Cat-III** (10 mol%) was added to a 50 mL Schlenk tube with a magnetic stirring bar. Charging with N<sub>2</sub>, 2-Me-THF (10 mL) was injected into the tube followed by **2a** (5.0 mmol). The mixture was stirred at 60 °C for 48 h. Removal of solvent under reduced pressure afforded a residue which is purified by chromatography on silica gel (PE:EA = 5:1) to afford **3aa** (283.0 mg, 73% yield). At the same time, **2a** (230.6 mg) was recovered and **6** (138.2 mg) was separated.

### 4.2 Control experiments.

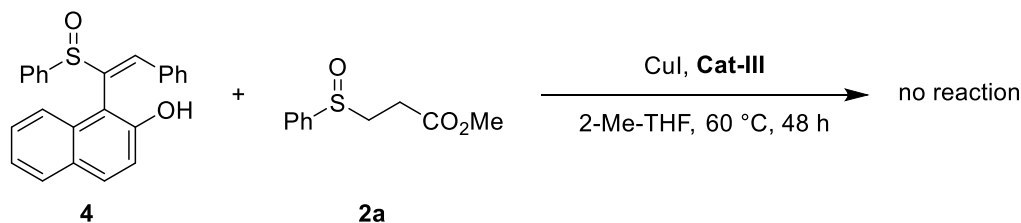

Refer to general procedure for the specific operation procedure.

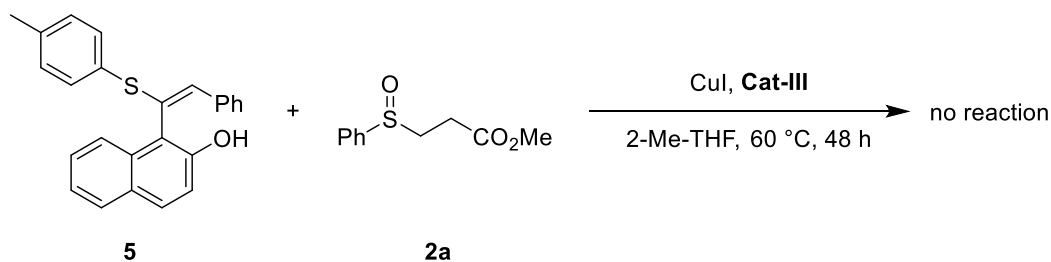

Refer to general procedure for the specific operation procedure.

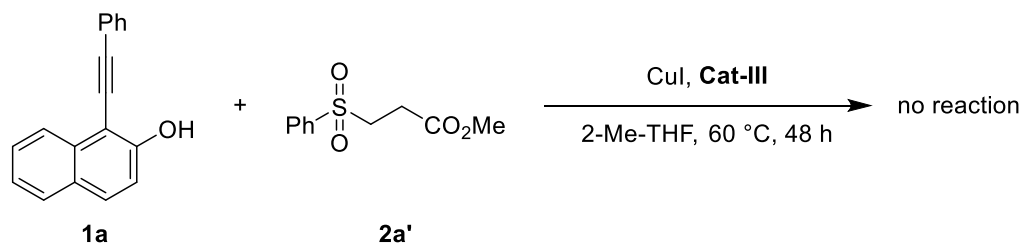

Refer to general procedure for the specific operation procedure.

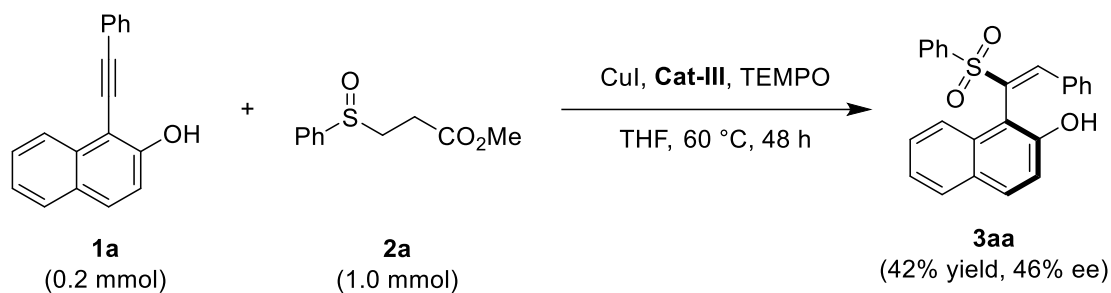

The substrate **1a** (0.2 mmol), CuI (10 mol%), **Cat-III** (10 mol%) and TEMPO (0.3 mmol) was added to a 10 mL Schlenk tube with a magnetic stirring bar. Charging with N<sub>2</sub>, THF (2 mL) was injected into the tube followed by **2a** (1.0 mmol). The mixture was stirred at 60 °C for 48 h. Removal of solvent under reduced pressure afforded a residue which is purified by chromatography on silica gel (PE:EA = 5:1) to afford **3aa** (32.2 mg, 42% yield).

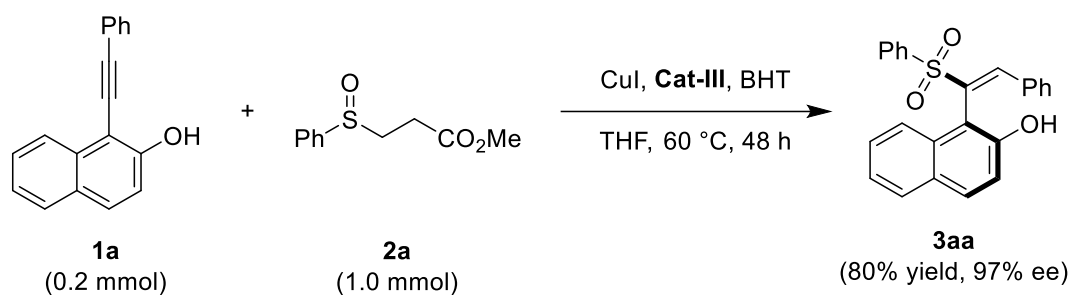

The substrate **1a** (0.2 mmol), CuI (10 mol%), **Cat-III** (10 mol%) and BHT (0.3 mmol) was added to a 10 mL Schlenk tube with a magnetic stirring bar. Charging with N<sub>2</sub>, THF (2 mL) was injected into the tube followed by **2a** (1.0 mmol). The mixture was stirred at 60 °C for 48 h. Removal of solvent under reduced pressure afforded a residue which is purified by chromatography on silica gel (PE:EA = 5:1) to afford **3aa** (61.7 mg, 80% yield).

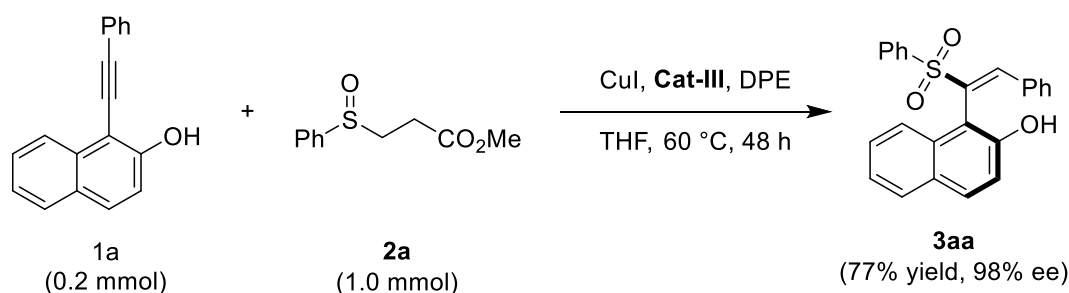

The substrate **1a** (0.2 mmol), CuI (10 mol%), **Cat-III** (10 mol%) and DPE (0.3 mmol) was added to a 10 mL Schlenk tube with a magnetic stirring bar. Charging with N<sub>2</sub>, THF (2 mL) was injected into the tube followed by **2a** (1.0 mmol). The mixture was stirred at 60 °C for 48 h. Removal of solvent under reduced pressure afforded a residue which is purified by chromatography on silica gel (PE:EA = 5:1) to afford **3aa** (59.6 mg, 77% yield).

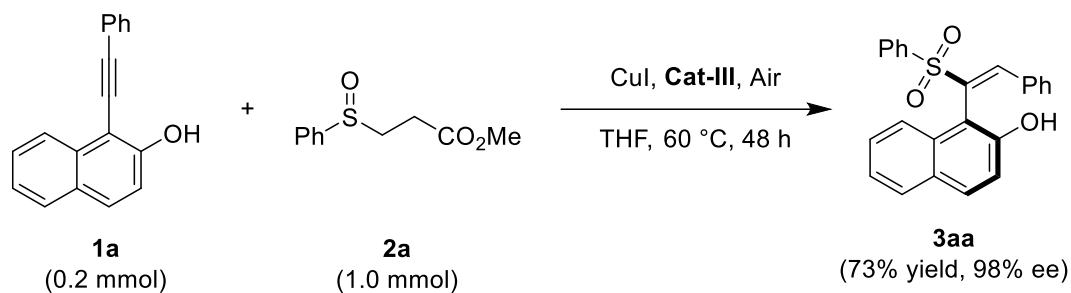

The substrate **1a** (0.2 mmol), CuI (10 mol%), **Cat-III** (10 mol%) was added to a 10 mL Schlenk tube with a magnetic stirring bar. THF (2 mL) was injected into the tube followed by **2a** (1.0 mmol). The mixture was stirred at 60 °C for 48 h. Removal of solvent under reduced pressure afforded a residue which is purified by chromatography on silica gel (PE:EA = 5:1) to afford **3aa** (56.3 mg, 73% yield).

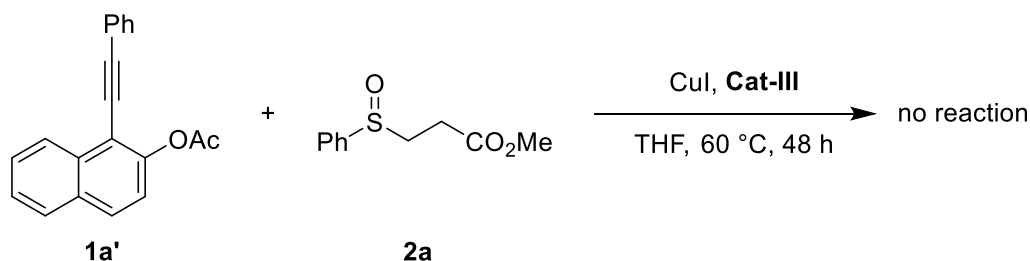

Refer to general procedure for the specific operation procedure.

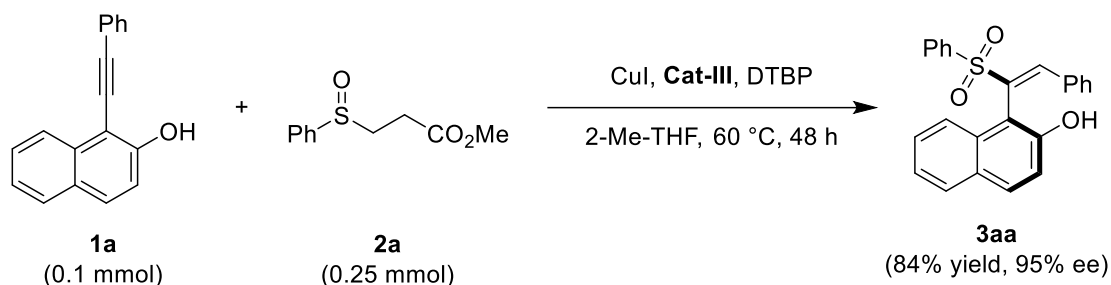

The substrate **1a** (0.1 mmol), CuI (10 mol%), and **Cat-III** (10 mol%) was added to a 10 mL schlenk tube with a magnetic stirring bar. Charging with N<sub>2</sub>, 2-Me-THF (1 mL) was injected into the tube followed by **2a** (0.25 mmol) and DTBP (0.25 mmol). The mixture was stirred at 60 °C for 48 h. Removal of solvent under reduced pressure afforded a residue which is purified by chromatography on silica gel (PE:EA = 5:1) to afford **3aa** (32.5 mg, 84% yield).

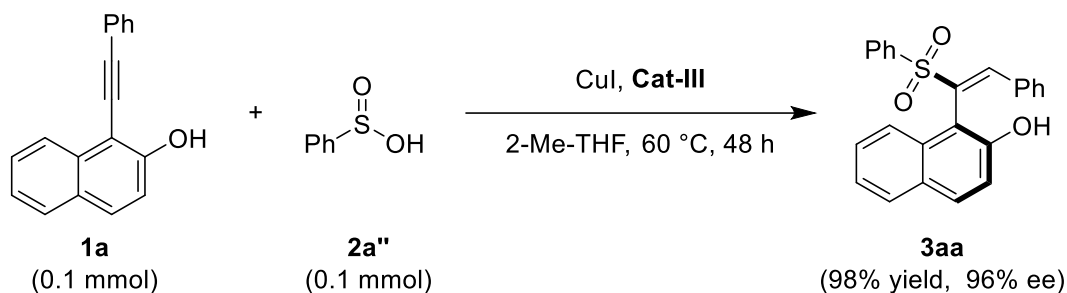

The substrate **2a''** (0.1 mmol), CuI (0.1 mmol), and **Cat-III** (0.1 mmol) was added to a 10 mL Schlenk tube with a magnetic stirring bar. Charging with N<sub>2</sub>, 2-Me-THF (1 mL) was injected into the tube. Stir the mixture at room temperature for 30 min. Then the substrate **1a** (0.1 mmol) was added. The mixture was stirred at 60 °C for 48 h. Removal of solvent under reduced pressure afforded a residue which is purified by chromatography on silica gel (PE:EA = 5:1) to afford **3aa** (37.8 mg, 98% yield).

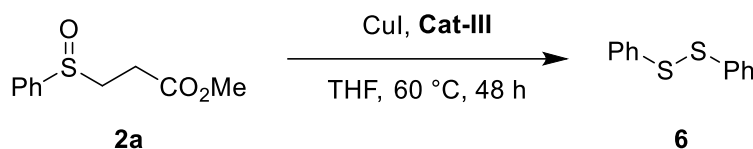

To a 10 mL Schlenk tube charging with CuI (10 mol%) and **Cat-III** (10 mol%) added THF (0.5 mL), then the substrate **2a** (0.05 mmol) was injected into the tube. The mixture was stirred at 60 °C for 48 h. Removal of solvent under reduced pressure afforded a residue which is purified by chromatography on silica gel to afford **6** (1.9 mg, 35% yield).

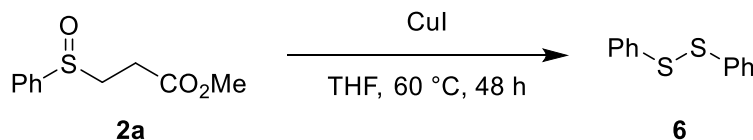

To a 10 mL Schlenk tube charging with CuI (10 mol%) added THF (0.5 mL), then the substrate **2a** (0.05 mmol) was injected into the tube. The mixture was stirred at 60 °C for 48 h. Removal of solvent under reduced pressure afforded a residue which is purified by chromatography on silica gel (PE) to afford **6** (1.8 mg, 33% yield).

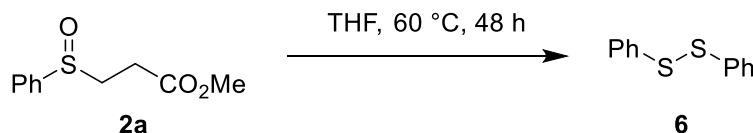

To a 10 mL Schlenk tube charging with THF (1 mL) added substrate **2a** (0.05 mmol) The mixture was stirred at 60 °C for 48 h. Removal of solvent under reduced pressure afforded a residue which is purified by chromatography on silica gel (PE) to afford **6** (1.0 mg, 18% yield).

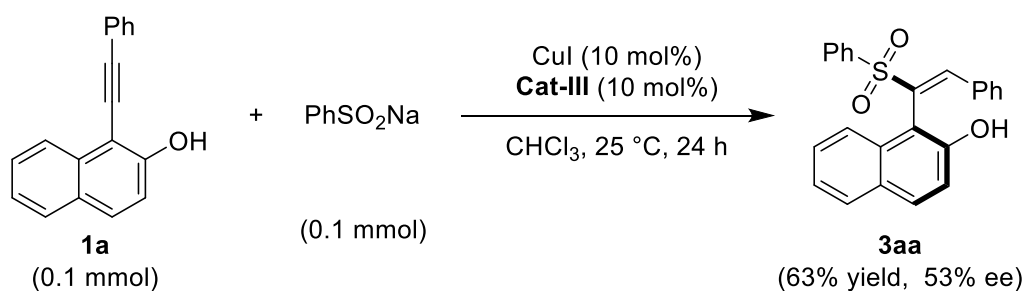

The substrate **1a** (0.1 mmol), sodium benzene sulfinate (0.1 mmol), CuI (10 mol%), and **Cat-III** (10 mol%) was added to a 10 mL Schlenk tube with a magnetic stirring bar. Charging with N<sub>2</sub>, Chloroform (1 mL) was injected into the tube. Stir the mixture at room temperature for 24 h. Removal of solvent under reduced pressure afforded a residue which is purified by chromatography on silica gel (PE:EA = 5:1) to afford **3aa** (24.4 mg, 63% yield).

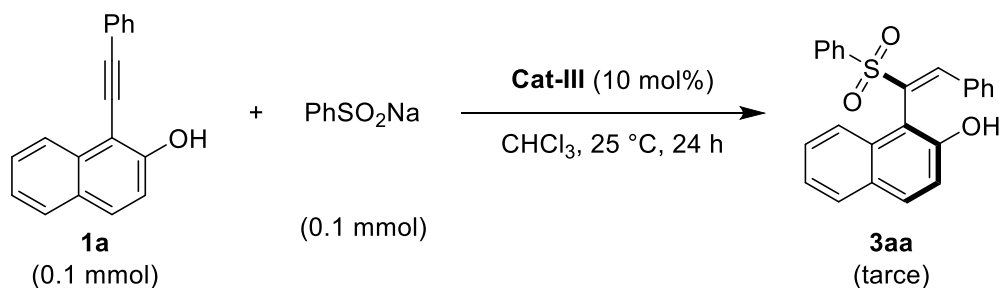

The substrate **1a** (0.1 mmol), sodium benzene sulfinate (0.1 mmol) and **Cat-III** (10 mol%) was added to a 10 mL Schlenk tube with a magnetic stirring bar. Charging with N<sub>2</sub>, Chloroform (1 mL) was injected into the tube. Stir the mixture at room temperature for 24 h. Only trace **3aa** was detected.



5.  $^1\text{H}$ ,  $^{13}\text{C}$  NMR and HRMS data of compound **2g'**.

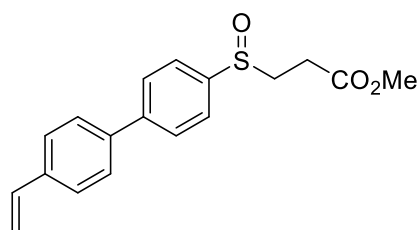

**2g'**

White foam. 166.0 mg. Yield = 53%.

$^1\text{H}$  NMR (400 MHz, CDCl<sub>3</sub>)  $\delta$  7.78 – 7.64 (m, 4H), 7.61 – 7.48 (m, 4H), 6.76 (dd,  $J$  = 17.6, 10.9 Hz, 1H), 5.82 (d,  $J$  = 18.2 Hz, 1H), 5.31 (d,  $J$  = 10.9 Hz, 1H), 3.66 (s, 3H), 3.33 – 3.22 (m, 1H), 3.05 – 2.97 (m, 1H), 2.92 – 2.82 (m, 1H), 2.64 – 2.55 (m, 1H).

$^{13}\text{C}$  NMR (101 MHz, CDCl<sub>3</sub>)  $\delta$  171.7, 143.8, 141.7, 137.6, 136.2, 127.8, 127.4, 126.9, 124.7, 114.7, 52.2, 51.2, 26.1.

HRMS (ESI) calcd for C<sub>18</sub>H<sub>19</sub>O<sub>3</sub>S<sup>+</sup>  $m/z$  [M + H]<sup>+</sup>: 315.1049; found: 315.1041.

## 6. Spectroscopic Data and HPLC of products.

Compounds **3aa-3ab**, **3ae-3ag**, **3ba-3da**, **3ga-3ha**, **3la-3na**, **3pa** were known and the spectroscopic data match those reported.<sup>4</sup>

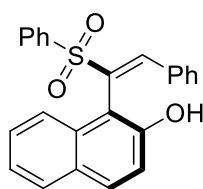

**3aa**

White foam. 68.2 mg. Yield = 88%.  $[\alpha]_D^{20} = -131.416^\circ$  ( $c = 1.0$ ,  $\text{CHCl}_3$ ).

$^1\text{H NMR}$  (400 MHz,  $\text{CDCl}_3$ )  $\delta$  8.32 (s, 1H), 7.82 (d,  $J = 8.9$  Hz, 1H), 7.62 (d,  $J = 8.1$  Hz, 1H), 7.60 – 7.53 (m, 2H), 7.34 – 7.28 (m, 2H), 7.22 – 6.94 (m, 9H), 6.89 – 6.84 (m, 1H), 6.80 (d,  $J = 8.3$  Hz, 1H).

$^{13}\text{C NMR}$  (101 MHz,  $\text{CDCl}_3$ )  $\delta$  153.9, 142.0, 136.7, 134.5, 133.7, 132.3, 132.2, 132.0, 130.9, 130.5, 129.0, 128.9, 128.8, 128.7, 128.1, 126.9, 123.7, 122.8, 119.8, 111.1.

**HPLC** (Daicel Chiralpak AD-H, hexane/*i*-PrOH = 80/20, flow rate 1.0 mL/min,  $\lambda = 254$  nm):  $t_1$  (major) = 8.752 min,  $t_2$  (minor) = 14.293 min.

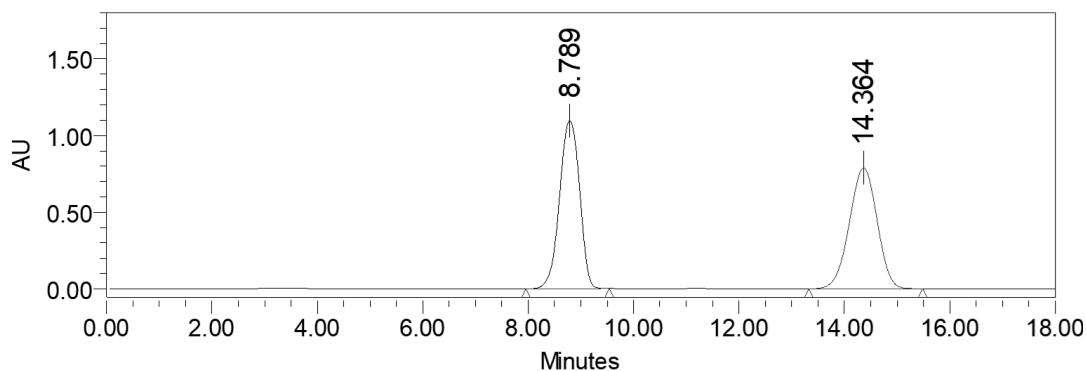

|   | Retention Time | Area     | % Area | Height  |
|---|----------------|----------|--------|---------|
| 1 | 8.789          | 28918301 | 50.06  | 1093960 |
| 2 | 14.364         | 28852209 | 49.94  | 788461  |

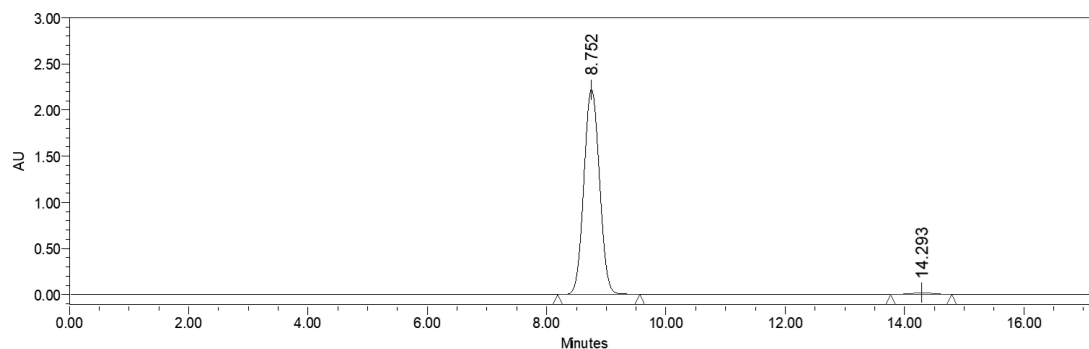

|   | Retention Time | Area     | % Area | Height  |
|---|----------------|----------|--------|---------|
| 1 | 8.752          | 40394399 | 98.68  | 2220504 |
| 2 | 14.293         | 541146   | 1.32   | 18472   |

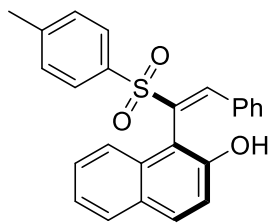

### 3ab

White foam. 66.3 mg. Yield = 83%.  $[\alpha]_D^{20} = -61.196^\circ$  ( $c = 1.0$ ,  $\text{CHCl}_3$ ).

$^1\text{H NMR}$  (400 MHz,  $\text{CDCl}_3$ )  $\delta$  8.29 (s, 1H), 7.82 (d,  $J = 8.9$  Hz, 1H), 7.62 (d,  $J = 8.1$  Hz, 1H), 7.46 – 7.37 (m, 3H), 7.30 (d,  $J = 8.9$  Hz, 1H), 7.15 (t,  $J = 7.3$  Hz, 1H), 7.12 – 7.06 (m, 1H), 7.03 (t,  $J = 7.7$  Hz, 2H), 6.99 – 6.91 (m, 4H), 6.91 – 6.85 (m, 1H), 6.82 (d,  $J = 8.5$  Hz, 1H), 2.19 (s, 3H).

$^{13}\text{C NMR}$  (101 MHz,  $\text{CDCl}_3$ )  $\delta$  153.8, 144.8, 141.6, 134.8, 133.6, 132.3, 132.2, 132.1, 130.8, 130.4, 129.4, 129.0, 128.9, 128.7, 128.0, 126.8, 123.6, 122.9, 119.8, 111.2, 21.6.

**HPLC** (Daicel Chiralpak AD-H, hexane/*i*-PrOH = 80/20, flow rate 1.0 mL/min,  $\lambda = 254$  nm):  $t_1$  (major) = 10.019 min,  $t_2$  (minor) = 15.646 min.

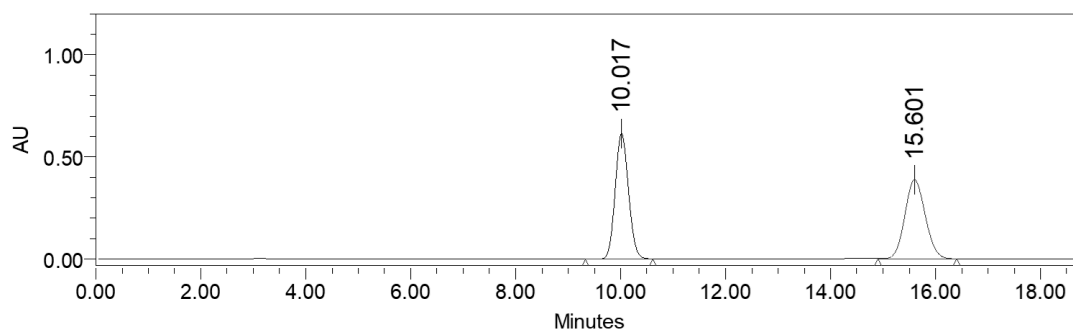

|   | Retention Time | Area     | % Area | Height |
|---|----------------|----------|--------|--------|
| 1 | 10.017         | 13409474 | 50.95  | 764048 |
| 2 | 15.601         | 12907272 | 49.05  | 480625 |

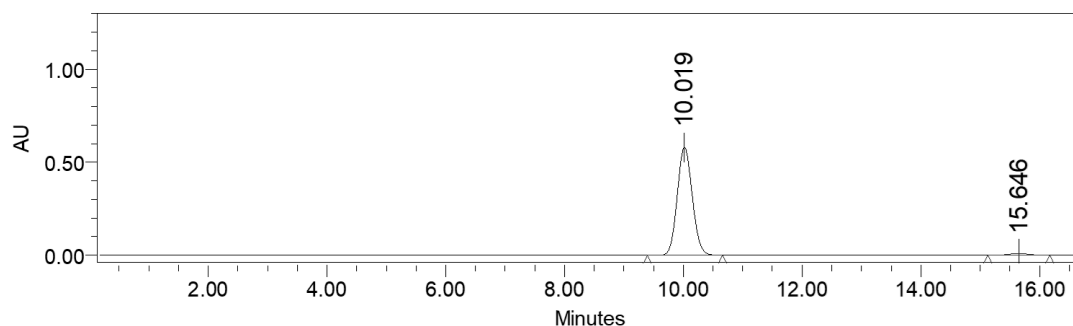

|   | Retention Time | Area     | % Area | Height |
|---|----------------|----------|--------|--------|
| 1 | 10.019         | 10229514 | 97.94  | 581881 |
| 2 | 15.646         | 215594   | 2.06   | 8325   |

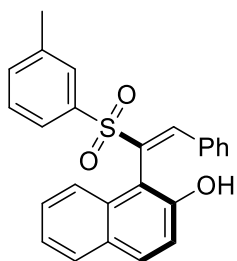

### 3ac

White foam. 62.4 mg. Yield = 78%.  $[\alpha]_D^{20} = -99.358^\circ$  ( $c = 1.0$ ,  $\text{CHCl}_3$ ).

$^1\text{H NMR}$  (400 MHz,  $\text{CDCl}_3$ )  $\delta$  8.30 (s, 1H), 7.82 (d,  $J = 8.9$  Hz, 1H), 7.63 (d,  $J = 8.2$  Hz, 1H), 7.41 – 7.27 (m, 4H), 7.19 – 7.14 (m, 1H), 7.13 – 6.97 (m, 7H), 6.91 – 6.85 (m, 1H), 6.81 (d,  $J = 8.5$  Hz, 1H), 2.07 (s, 3H).

$^{13}\text{C NMR}$  (101 MHz,  $\text{CDCl}_3$ )  $\delta$  153.8, 141.8, 139.0, 136.3, 134.6, 134.4, 132.3, 132.2, 132.1, 130.9, 130.5, 129.3, 129.0, 128.8, 128.6, 128.0, 126.8, 126.0, 123.7, 122.8, 119.9, 111.3, 20.9.

**HRMS** (ESI) calcd for  $\text{C}_{25}\text{H}_{21}\text{O}_3\text{S}^+$   $m/z$   $[\text{M} + \text{H}]^+$ : 401.1206; found: 401.1203.

**HPLC** (Daicel Chiralpak AD-H, hexane/*i*-PrOH = 80/20, flow rate 1.0 mL/min,  $\lambda = 254$  nm):  $t_1$  (major) = 7.414 min,  $t_2$  (minor) = 12.252 min.

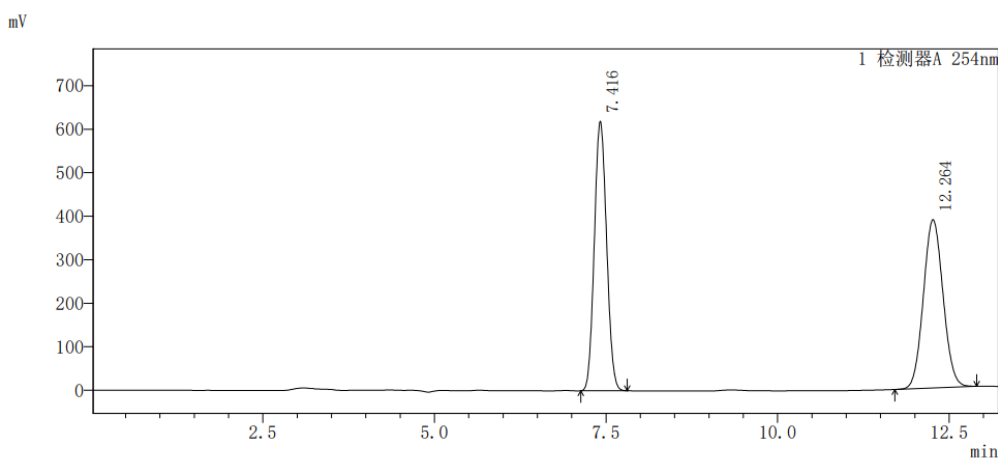

| 峰号 | 保留时间   | 面积       | 面积%     | 高度      |
|----|--------|----------|---------|---------|
| 1  | 7.416  | 7701108  | 49.982  | 619584  |
| 2  | 12.264 | 7706534  | 50.018  | 387132  |
| 总计 |        | 15407642 | 100.000 | 1006717 |

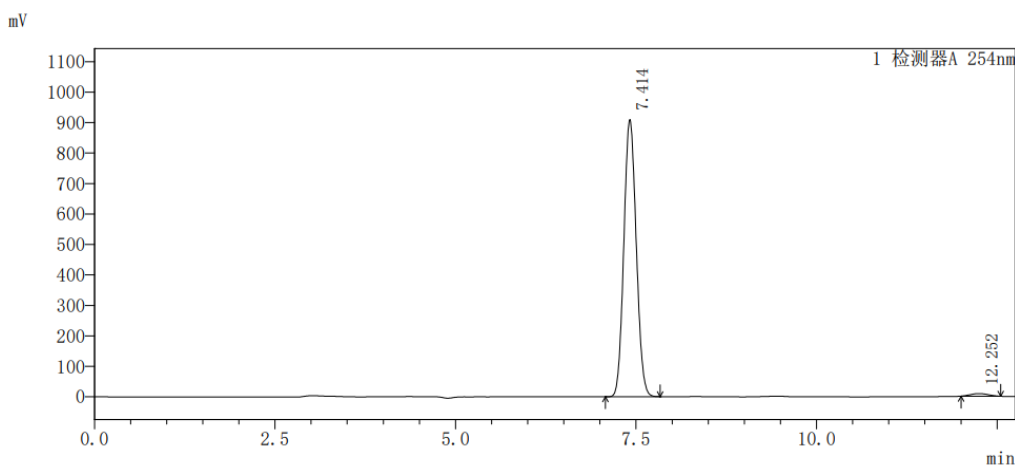

| 峰号 | 保留时间   | 面积       | 面积%     | 高度     |
|----|--------|----------|---------|--------|
| 1  | 7.414  | 10870128 | 98.664  | 910075 |
| 2  | 12.252 | 147153   | 1.336   | 8584   |
| 总计 |        | 11017281 | 100.000 | 918659 |

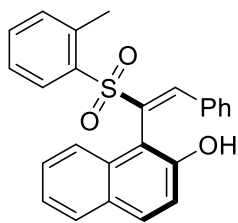

### 3ad

White foam. 70.8 mg. Yield = 88%.  $[\alpha]_D^{20} = -100.699^\circ$  ( $c = 1.0$ ,  $\text{CHCl}_3$ ).

$^1\text{H NMR}$  (400 MHz,  $\text{CDCl}_3$ )  $\delta$  8.32 (s, 1H), 7.79 (d,  $J = 8.9$  Hz, 1H), 7.61 (d,  $J = 8.2$  Hz, 1H), 7.54 (dd,  $J = 8.0, 1.4$  Hz, 1H), 7.39 (s, 1H), 7.27 (d,  $J = 8.9$  Hz, 1H), 7.22 – 7.14 (m, 2H), 7.12 – 6.97 (m, 6H), 6.95 – 6.85 (m, 3H), 2.54 (s, 3H).

$^{13}\text{C NMR}$  (101 MHz,  $\text{CDCl}_3$ )  $\delta$  153.9, 142.2, 139.2, 134.5, 134.5, 133.8, 132.6, 132.2, 132.2, 132.2, 131.3, 130.9, 130.5, 129.0, 128.8, 128.1, 126.8, 126.3, 123.7, 122.6, 119.8, 111.1, 20.8.

HRMS (ESI) calcd for  $\text{C}_{25}\text{H}_{21}\text{O}_3\text{S}^+$   $m/z$   $[\text{M} + \text{H}]^+$ : 401.1206; found: 401.1203.

HPLC (Daicel Chiralpak AD-H, hexane/*i*-PrOH = 80/20, flow rate 1.0 mL/min,  $\lambda = 254$  nm):  $t_1$  (major) = 7.545 min,  $t_2$  (minor) = 10.234 min.

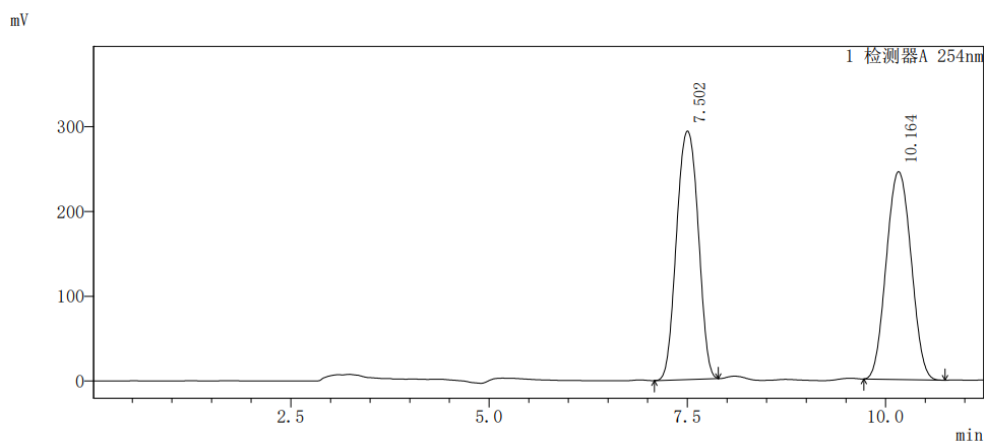

| 峰号 | 保留时间   | 面积       | 面积%     | 高度     |
|----|--------|----------|---------|--------|
| 1  | 7.502  | 5591931  | 51.153  | 293336 |
| 2  | 10.164 | 5339949  | 48.847  | 245319 |
| 总计 |        | 10931881 | 100.000 | 538655 |

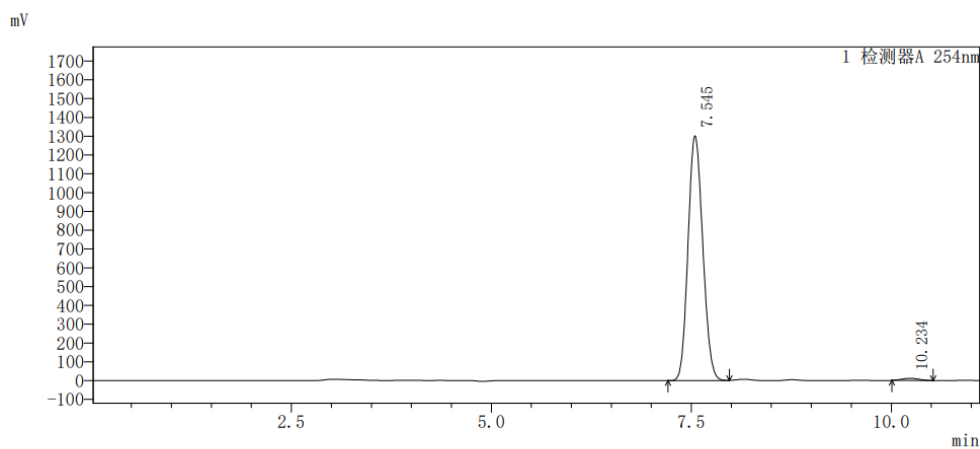

| 峰号 | 保留时间   | 面积       | 面积%     | 高度      |
|----|--------|----------|---------|---------|
| 1  | 7.545  | 16725934 | 98.990  | 1302431 |
| 2  | 10.234 | 170663   | 1.010   | 11263   |
| 总计 |        | 16896598 | 100.000 | 1313694 |

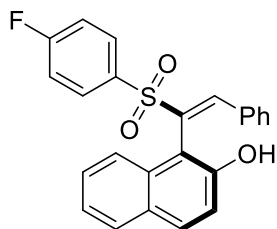

### 3ae

White foam. 66.6 mg. Yield = 82%.  $[\alpha]_D^{20} = -84.219^\circ$  ( $c = 1.0$ ,  $\text{CHCl}_3$ ).

$^1\text{H NMR}$  (400 MHz,  $\text{CDCl}_3$ )  $\delta$  8.32 (s, 1H), 7.84 (d,  $J = 8.9$  Hz, 1H), 7.65 (d,  $J = 8.2$  Hz, 1H), 7.58 – 7.52 (m, 2H), 7.31 (d,  $J = 8.9$  Hz, 1H), 7.26 (s, 1H), 7.20 – 7.15 (m, 1H), 7.15 – 7.10 (m, 1H), 7.08 – 6.98 (m, 4H), 6.96 – 6.91 (m, 1H), 6.86 – 6.79 (m, 3H).

$^{13}\text{C NMR}$  (101 MHz,  $\text{CDCl}_3$ )  $\delta$  165.9 (d,  $J = 257.8$  Hz), 153.8, 142.2, 134.2, 132.8 (d,  $J = 3.1$  Hz), 132.4, 132.1, 131.9, 131.8, 131.7, 131.0, 130.5, 129.0, 128.8, 128.2, 127.1, 123.9, 122.6, 119.8, 116.1, 115.9, 110.8.

$^{19}\text{F NMR}$  (376 MHz,  $\text{CDCl}_3$ )  $\delta$  -103.30.

**HPLC** (Daicel Chiralpak AD-H, hexane/*i*-PrOH = 80/20, flow rate 1.0 mL/min,  $\lambda = 254$  nm):  $t_1$  (major) = 7.510 min,  $t_2$  (minor) = 10.259 min.

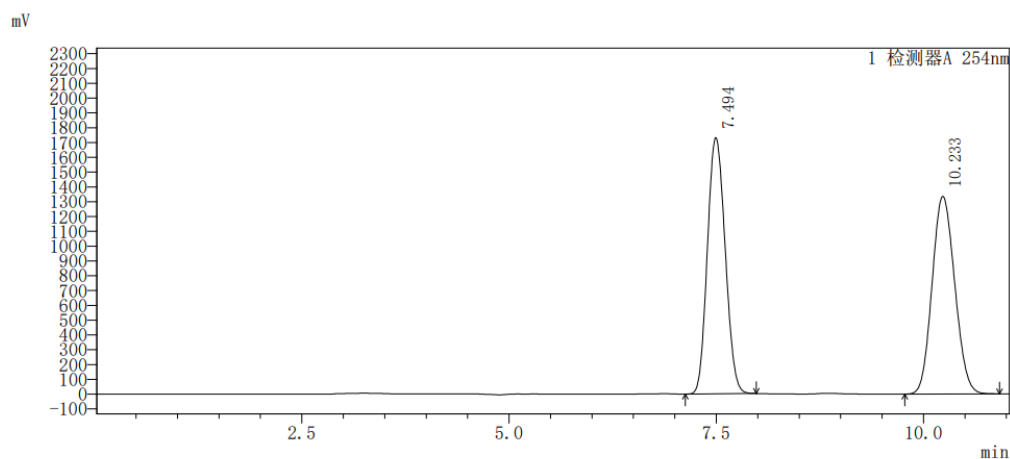

| 检测器A 254nm |        |          |         |         |
|------------|--------|----------|---------|---------|
| 峰号         | 保留时间   | 面积       | 面积%     | 高度      |
| 1          | 7.494  | 25846097 | 50.456  | 1730687 |
| 2          | 10.233 | 25378708 | 49.544  | 1335548 |
| 总计         |        | 51224805 | 100.000 | 3066235 |

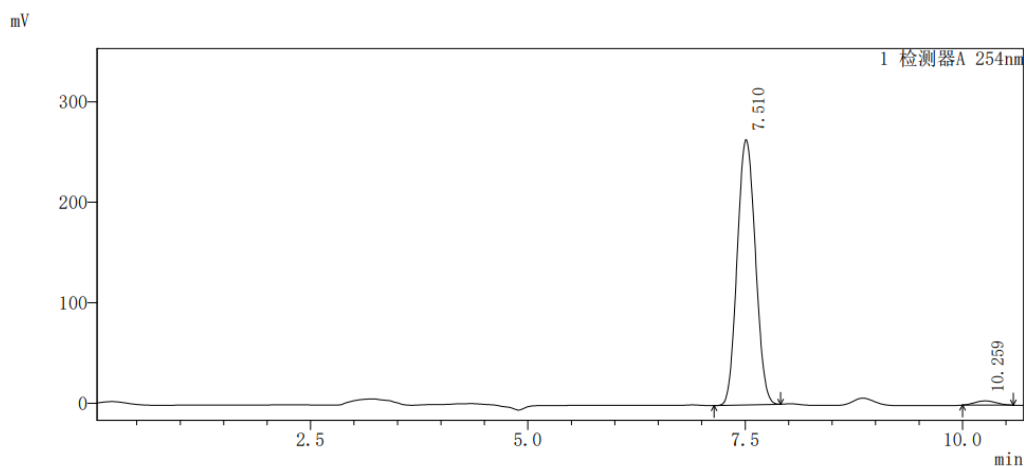

| 检测器A 254nm |        |         |         |        |
|------------|--------|---------|---------|--------|
| 峰号         | 保留时间   | 面积      | 面积%     | 高度     |
| 1          | 7.510  | 3837313 | 98.145  | 264043 |
| 2          | 10.259 | 72530   | 1.855   | 4255   |
| 总计         |        | 3909844 | 100.000 | 268298 |

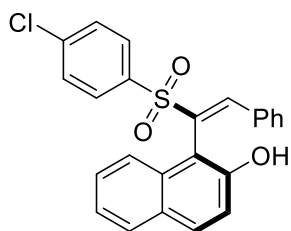

### 3af

White foam. 60.1 mg. Yield = 71%.  $[\alpha]_D^{20} = -53.985^\circ$  ( $c = 1.0$ ,  $\text{CHCl}_3$ ).

$^1\text{H NMR}$  (400 MHz,  $\text{CDCl}_3$ )  $\delta$  8.31 (s, 1H), 7.84 (d,  $J = 8.9$  Hz, 1H), 7.66 (d,  $J = 8.1$  Hz, 1H), 7.47 (d,  $J = 8.6$  Hz, 2H), 7.30 (d,  $J = 8.9$  Hz, 1H), 7.22 – 7.09 (m, 5H), 7.10 – 6.96 (m, 4H), 6.97 – 6.91 (m, 1H), 6.82 (d,  $J = 8.4$  Hz, 1H).

$^{13}\text{C NMR}$  (101 MHz,  $\text{CDCl}_3$ )  $\delta$  153.8, 142.5, 140.6, 135.3, 134.1, 132.5, 132.1, 131.9, 131.1, 130.5, 130.4, 129.0, 128.9, 128.3, 127.2, 123.9, 122.6, 119.8, 110.8.

**HPLC** (Daicel Chiralpak AD-H, hexane/*i*-PrOH = 80/20, flow rate 1.0 mL/min,  $\lambda = 254$  nm):  $t_1$  (major) = 8.039 min,  $t_2$  (minor) = 10.798 min.

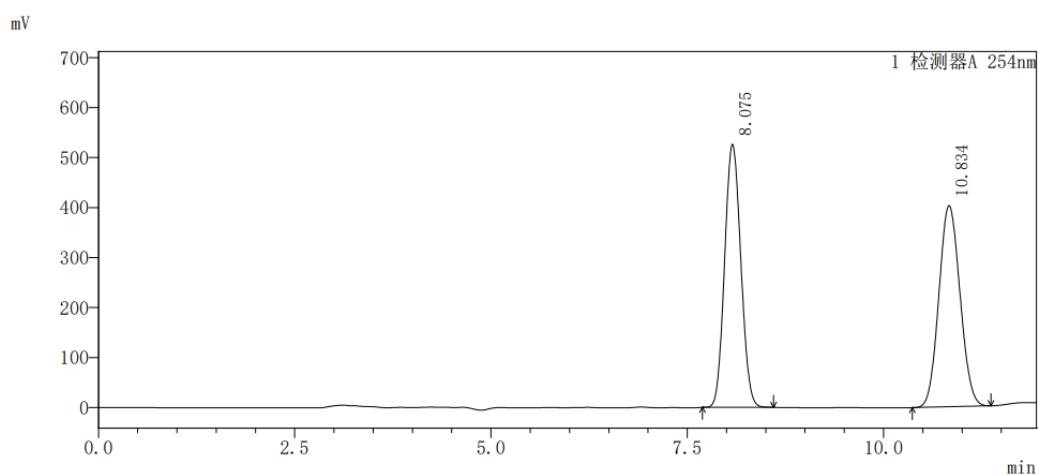

| 峰号 | 保留时间   | 面积       | 面积%     | 高度     |
|----|--------|----------|---------|--------|
| 1  | 8.075  | 7562912  | 50.070  | 526577 |
| 2  | 10.834 | 7541807  | 49.930  | 402695 |
| 总计 |        | 15104719 | 100.000 | 929272 |

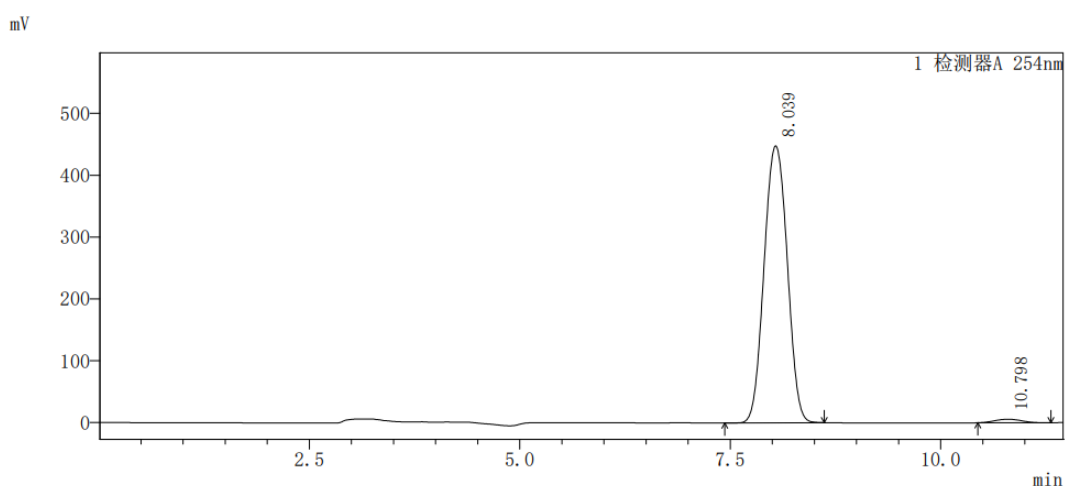

| 峰号 | 保留时间   | 面积      | 面积%     | 高度     |
|----|--------|---------|---------|--------|
| 1  | 8.039  | 8567539 | 98.564  | 448182 |
| 2  | 10.798 | 124785  | 1.436   | 5709   |
| 总计 |        | 8692324 | 100.000 | 453890 |

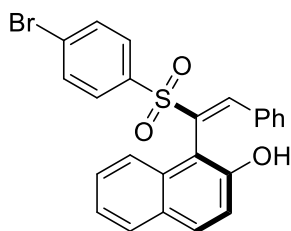

### 3ag

White foam. 78.8 mg. Yield = 85%.  $[\alpha]_D^{20} = -82.211^\circ$  (c = 1.0, CHCl<sub>3</sub>).

<sup>1</sup>H NMR (400 MHz, CDCl<sub>3</sub>) δ 8.31 (s, 1H), 7.85 (d, *J* = 8.9 Hz, 1H), 7.67 (d, *J* = 8.1 Hz, 1H), 7.39 (d, *J* = 8.6 Hz, 2H), 7.33 – 7.27 (m, 3H), 7.22 – 7.12 (m, 3H), 7.09 – 7.03 (m, 2H), 7.03 – 6.98 (m, 2H), 6.97 – 6.91 (m, 1H), 6.81 (d, *J* = 8.5 Hz, 1H).

<sup>13</sup>C NMR (101 MHz, CDCl<sub>3</sub>) δ 153.8, 142.5, 135.9, 134.0, 132.5, 132.1, 132.0, 131.9, 131.2, 130.5, 130.4, 129.2, 129.0, 128.9, 128.3, 127.2, 123.9, 122.6, 119.8, 110.8.

HPLC (Daicel Chiralpak AD-H, hexane/*i*-PrOH = 80/20, flow rate 1.0 mL/min, λ = 254 nm): t<sub>1</sub> (major) = 8.813 min, t<sub>2</sub> (minor) = 12.107 min.

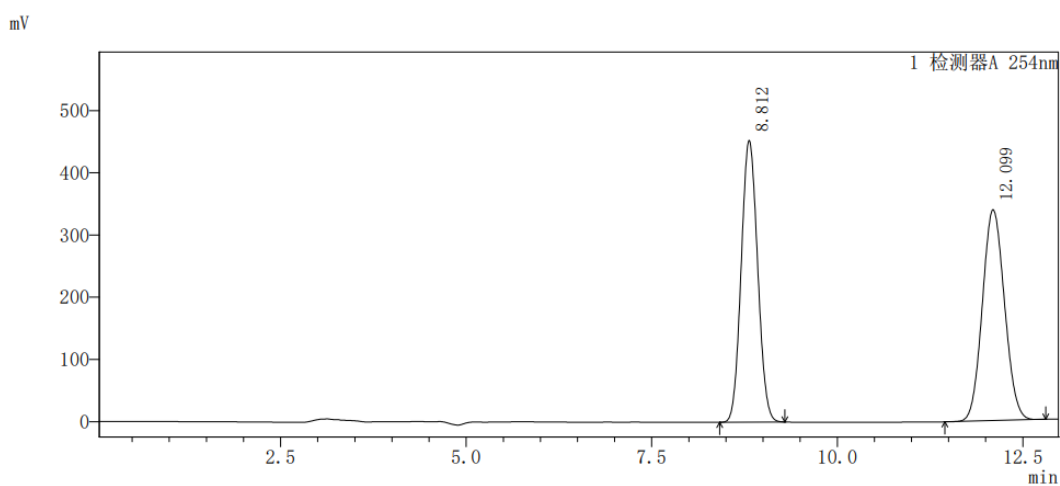

| 峰号 | 保留时间   | 面积       | 面积%     | 高度     |
|----|--------|----------|---------|--------|
| 1  | 8.812  | 6971751  | 49.772  | 452966 |
| 2  | 12.099 | 7035688  | 50.228  | 339184 |
| 总计 |        | 14007439 | 100.000 | 792150 |

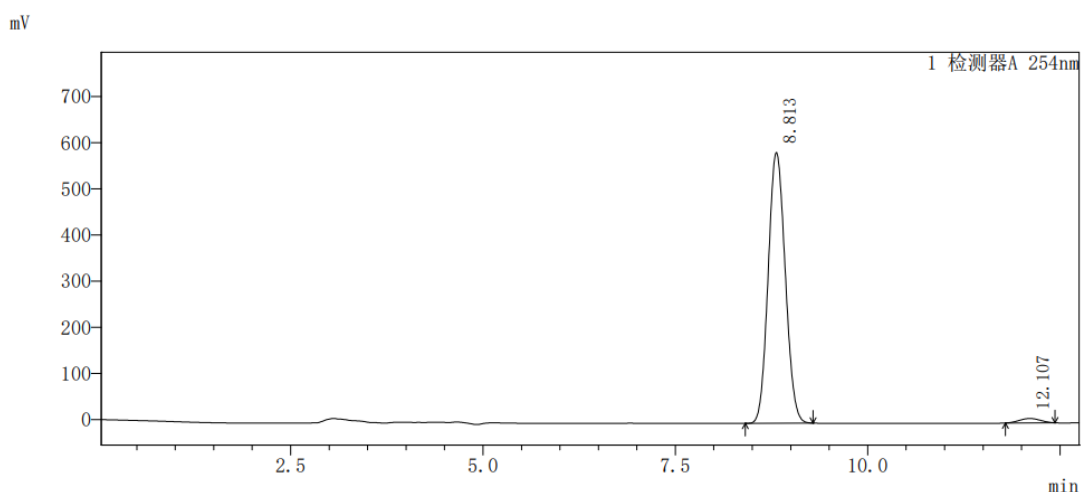

| 峰号 | 保留时间   | 面积      | 面积%     | 高度     |
|----|--------|---------|---------|--------|
| 1  | 8.813  | 9061470 | 98.053  | 587143 |
| 2  | 12.107 | 179963  | 1.947   | 9516   |
| 总计 |        | 9241433 | 100.000 | 596660 |



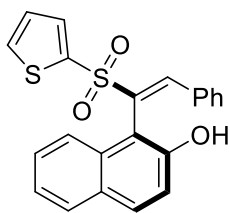

### 3ah

White foam. 58.0 mg. Yield = 74%.  $[\alpha]_D^{20} = -92.158^\circ$  ( $c = 1.0$ ,  $\text{CHCl}_3$ ).

$^1\text{H NMR}$  (400 MHz,  $\text{CDCl}_3$ )  $\delta$  8.32 (s, 1H), 7.85 (d,  $J = 8.9$  Hz, 1H), 7.67 (d,  $J = 8.1$  Hz, 1H), 7.39 (dd,  $J = 5.0, 1.3$  Hz, 1H), 7.33 (d,  $J = 8.9$  Hz, 1H), 7.23 (dd,  $J = 3.9, 1.4$  Hz, 1H), 7.20 – 6.93 (m, 9H), 6.73 (dd,  $J = 4.9, 3.8$  Hz, 1H).

$^{13}\text{C NMR}$  (101 MHz,  $\text{CDCl}_3$ )  $\delta$  153.9, 141.8, 137.1, 135.6, 135.1, 134.6, 132.5, 132.4, 132.1, 131.0, 130.5, 129.0, 128.8, 128.2, 127.8, 127.2, 123.8, 122.5, 119.9, 110.9.

**HRMS** (ESI) calcd for  $\text{C}_{22}\text{H}_{17}\text{O}_3\text{S}_2^+$   $m/z$   $[\text{M} + \text{H}]^+$ : 393.0614; found: 393.0609.

**HPLC** (Daicel Chiralpak AD-H, hexane/*i*-PrOH = 80/20, flow rate 1.0 mL/min,  $\lambda = 244$  nm):  $t_1$  (major) = 9.837 min,  $t_2$  (minor) = 16.946 min.

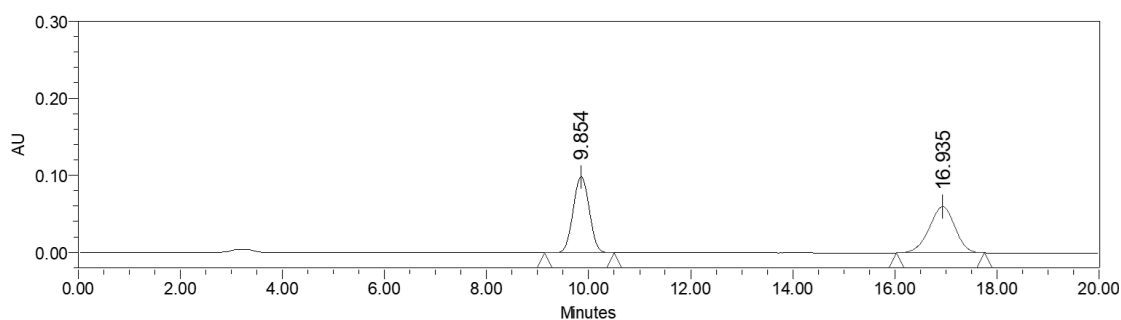

|   | Retention Time | Area    | % Area | Height |
|---|----------------|---------|--------|--------|
| 1 | 9.854          | 2165545 | 50.78  | 98760  |
| 2 | 16.935         | 2099006 | 49.22  | 59956  |

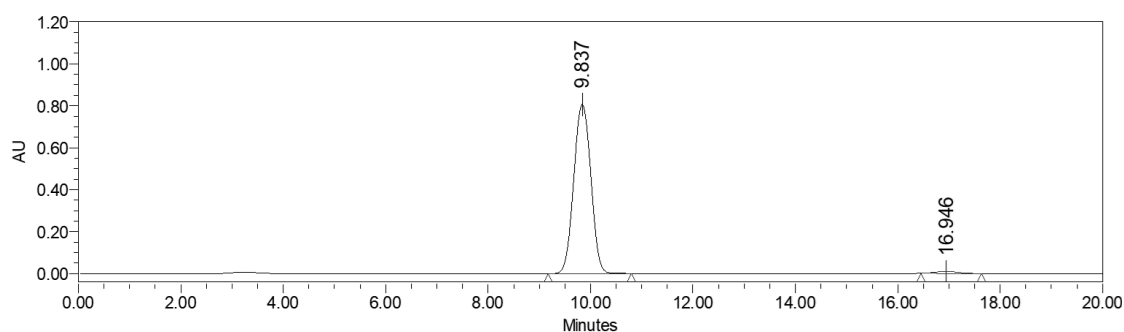

|   | Retention Time | Area     | % Area | Height |
|---|----------------|----------|--------|--------|
| 1 | 9.837          | 18700324 | 98.43  | 806442 |
| 2 | 16.946         | 298392   | 1.57   | 9362   |

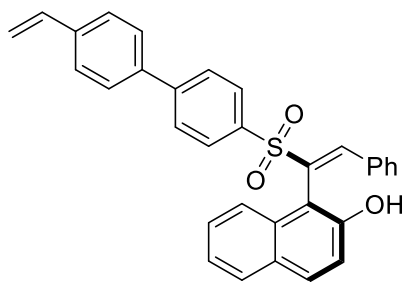

### 3ag'

White foam. 81.1 mg. Yield = 83%.  $[\alpha]_D^{20} = -102.153^\circ$   
( $c = 1.0$ , CHCl<sub>3</sub>).

<sup>1</sup>H NMR (400 MHz, CDCl<sub>3</sub>)  $\delta$  8.33 (s, 1H), 7.84 (d,  $J = 8.9$  Hz, 1H), 7.62 (d,  $J = 8.1$  Hz, 1H), 7.59 – 7.55 (m, 2H), 7.46 – 7.40 (m, 2H), 7.37 – 7.28 (m, 6H), 7.20 – 7.16 (m, 1H), 7.09 – 6.97 (m, 5H), 6.86 – 6.79 (m, 2H), 6.72 (dd,  $J = 17.6, 10.9$  Hz, 1H), 5.79 (d,  $J = 17.7$  Hz, 1H), 5.30 (d,  $J = 10.8$  Hz, 1H).

<sup>13</sup>C NMR (101 MHz, CDCl<sub>3</sub>)  $\delta$  153.9, 146.3, 141.9, 138.5, 138.0, 136.1, 135.0, 134.6, 132.3, 132.3, 132.1, 130.9, 130.5, 129.5, 129.0, 128.8, 128.1, 127.5, 127.1, 126.9, 126.9, 123.7, 122.8, 119.9, 115.0, 111.2.

HRMS (ESI) calcd for C<sub>32</sub>H<sub>25</sub>O<sub>3</sub>S<sup>+</sup>  $m/z$  [M + H]<sup>+</sup>: 489.1519; found: 489.1505.

HPLC (Daicel Chiralpak AD-H, hexane/*i*-PrOH = 80/20, flow rate 1.0 mL/min,  $\lambda = 254$  nm):  $t_1$  (major) = 12.704 min,  $t_2$  (minor) = 16.442 min.

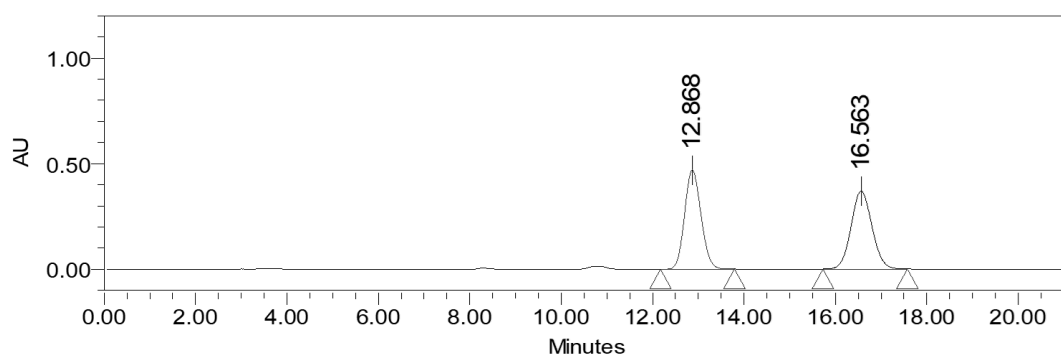

|   | Retention Time | Area     | % Area | Height |
|---|----------------|----------|--------|--------|
| 1 | 12.868         | 11723631 | 49.92  | 470622 |
| 2 | 16.563         | 11759394 | 50.08  | 369632 |

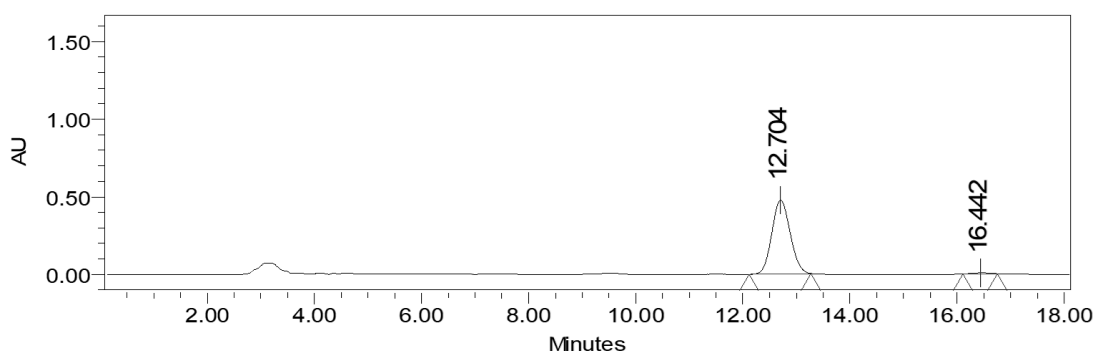

|   | Retention Time | Area     | % Area | Height |
|---|----------------|----------|--------|--------|
| 1 | 12.704         | 11298292 | 98.72  | 475290 |
| 2 | 16.442         | 146390   | 1.28   | 6627   |

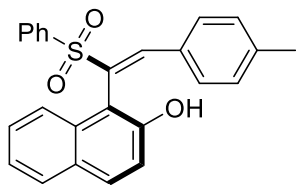

### 3ba

White foam. 72.1 mg. Yield = 90%.  $[\alpha]_D^{20} = -184.739^\circ$  ( $c = 0.7$ ,  $\text{CHCl}_3$ ).

$^1\text{H NMR}$  (400 MHz,  $\text{CDCl}_3$ )  $\delta$  8.29 (s, 1H), 7.82 (d,  $J = 8.9$  Hz, 1H), 7.62 (d,  $J = 8.1$  Hz, 1H), 7.59 – 7.54 (m, 2H), 7.36 (s, 1H), 7.34 – 7.28 (m, 2H), 7.15 (t,  $J = 7.9$  Hz, 2H), 7.11 – 7.06 (m, 1H), 6.90 – 6.78 (m, 6H), 2.16 (s, 3H).

$^{13}\text{C NMR}$  (101 MHz,  $\text{CDCl}_3$ )  $\delta$  153.9, 142.1, 141.6, 136.9, 133.6, 133.1, 132.2, 132.1, 130.6, 129.6, 129.5, 129.0, 128.9, 128.7, 128.0, 126.9, 123.7, 122.9, 119.8, 111.3, 21.5.

**HPLC** (Daicel Chiralpak AD-H, hexane/*i*-PrOH = 80/20, flow rate 1.0 mL/min,  $\lambda = 254$  nm):  $t_1$  (major) = 9.769 min,  $t_2$  (minor) = 16.263 min.

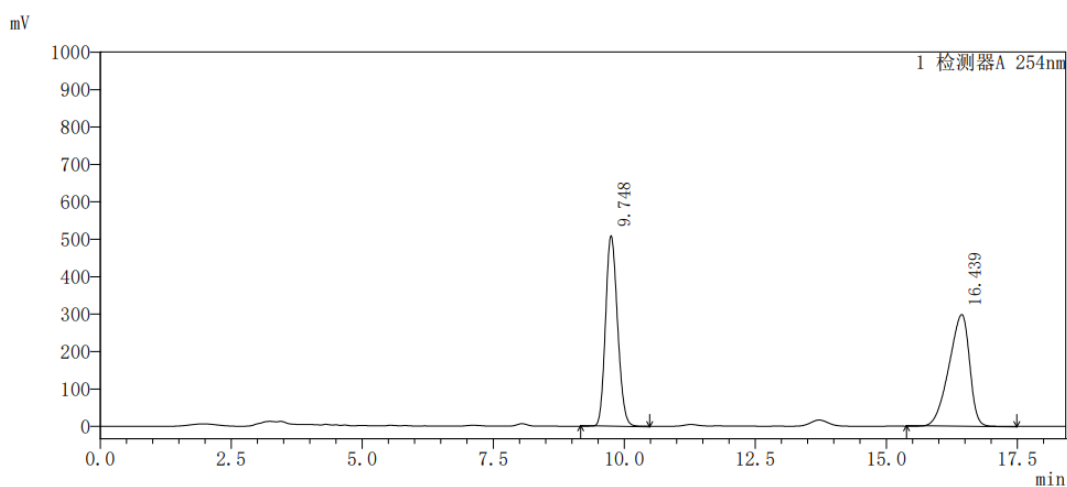

| 峰号 | 保留时间   | 面积       | 面积%     | 高度     |
|----|--------|----------|---------|--------|
| 1  | 9.748  | 8122141  | 49.889  | 509552 |
| 2  | 16.439 | 8158374  | 50.111  | 298704 |
| 总计 |        | 16280515 | 100.000 | 808256 |

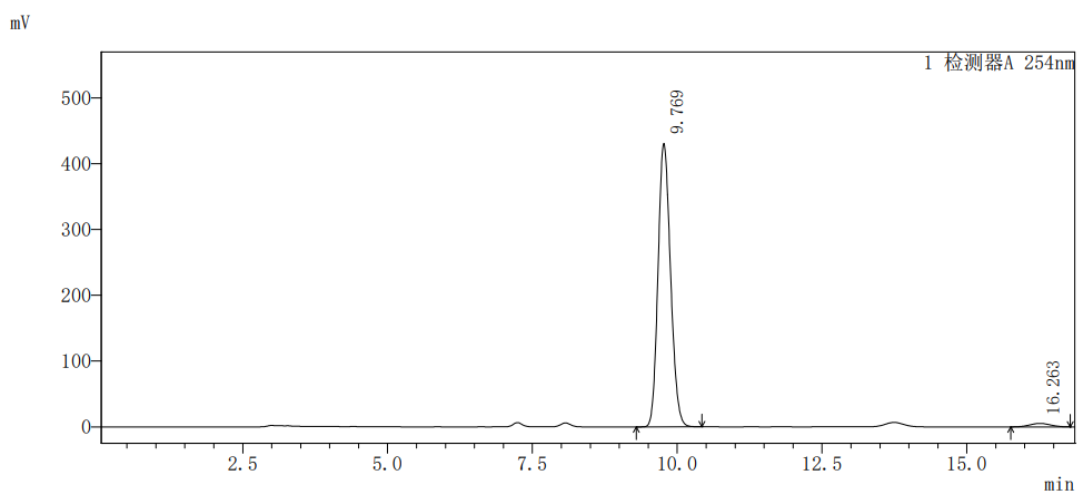

| 峰号 | 保留时间   | 面积      | 面积%     | 高度     |
|----|--------|---------|---------|--------|
| 1  | 9.769  | 6467668 | 98.000  | 430626 |
| 2  | 16.263 | 131974  | 2.000   | 5289   |
| 总计 |        | 6599642 | 100.000 | 435916 |

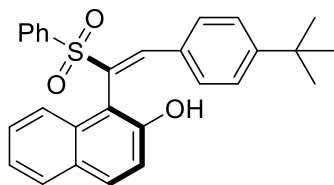

### 3ca

White foam. 57.7 mg. Yield = 65%.  $[\alpha]_D^{20} = -155.153^\circ$  ( $c = 1.0$ ,  $\text{CHCl}_3$ ).

$^1\text{H NMR}$  (400 MHz,  $\text{CDCl}_3$ )  $\delta$  8.30 (s, 1H), 7.84 (d,  $J = 8.9$  Hz, 1H), 7.65 (d,  $J = 8.2$  Hz, 1H), 7.55 (d,  $J = 7.0$  Hz, 2H), 7.35 – 7.29 (m, 2H), 7.22 (s, 1H), 7.19 – 7.05 (m, 5H), 6.93 – 6.82 (m, 4H), 1.15 (s, 9H).

$^{13}\text{C NMR}$  (101 MHz,  $\text{CDCl}_3$ )  $\delta$  154.7, 153.7, 141.9, 136.9, 133.6, 133.1, 132.3, 132.2, 130.6, 129.3, 129.0, 128.9, 128.7, 128.1, 126.9, 125.9, 123.7, 123.0, 119.8, 111.3, 34.9, 31.0.

**HPLC** (Daicel Chiralpak AD-H, hexane/*i*-PrOH = 80/20, flow rate 1.0 mL/min,  $\lambda = 254$  nm):  $t_1$  (major) = 7.627 min,  $t_2$  (minor) = 11.402 min.

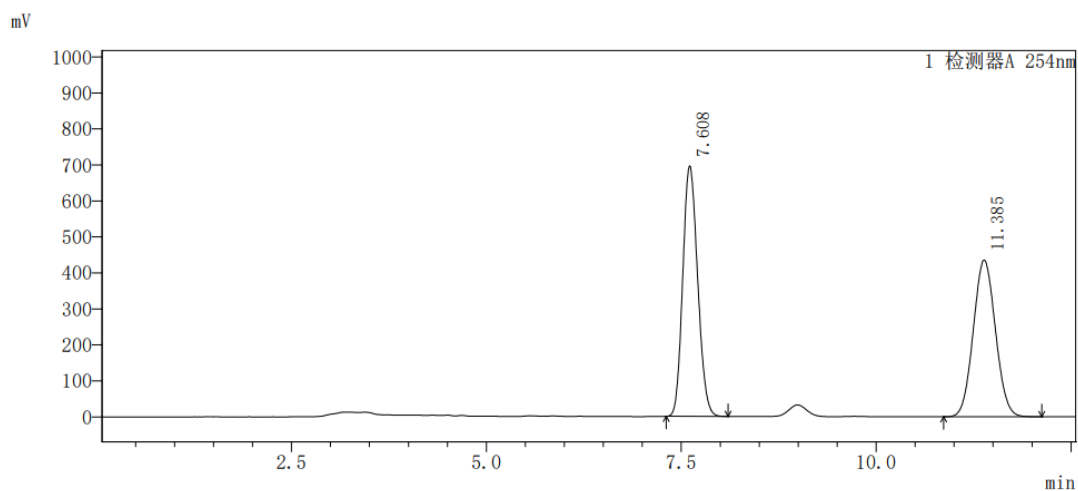

| 峰号 | 保留时间   | 面积       | 面积%     | 高度      |
|----|--------|----------|---------|---------|
| 1  | 7.608  | 9256827  | 51.827  | 696517  |
| 2  | 11.385 | 8604271  | 48.173  | 435424  |
| 总计 |        | 17861099 | 100.000 | 1131941 |

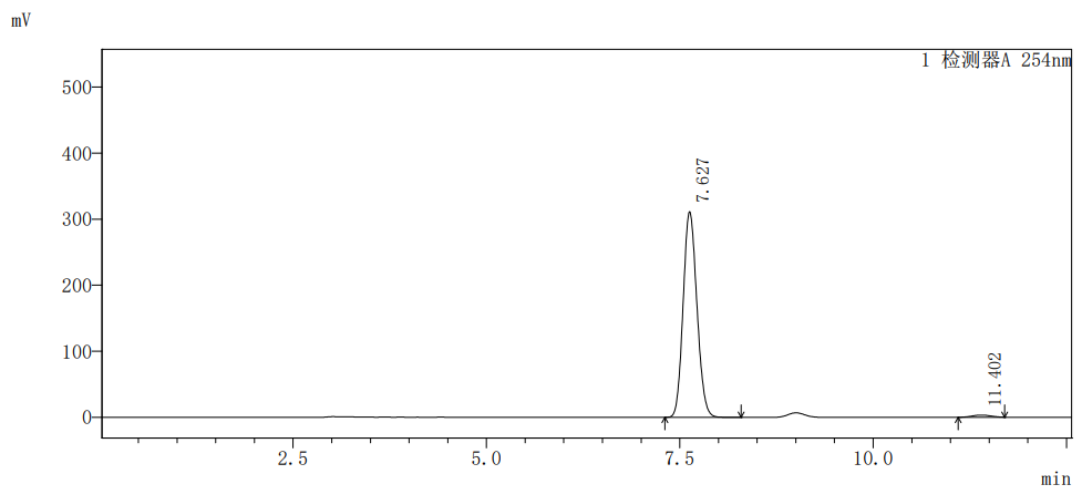

| 峰号 | 保留时间   | 面积      | 面积%     | 高度     |
|----|--------|---------|---------|--------|
| 1  | 7.627  | 3858458 | 98.502  | 311677 |
| 2  | 11.402 | 58688   | 1.498   | 3374   |
| 总计 |        | 3917146 | 100.000 | 315051 |

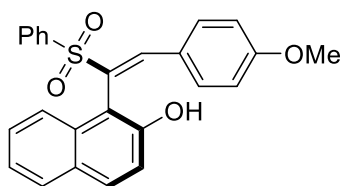

### 3da

White foam. 75.3 mg. Yield = 90%.  $[\alpha]_D^{20} = -192.913^\circ$  ( $c = 1.0$ ,  $\text{CHCl}_3$ ).

$^1\text{H NMR}$  (400 MHz,  $\text{CDCl}_3$ )  $\delta$  8.26 (s, 1H), 7.82 (d,  $J = 8.9$  Hz, 1H), 7.63 (d,  $J = 8.1$  Hz, 1H), 7.58 – 7.53 (m, 2H), 7.40 (s, 1H), 7.34 – 7.28 (m, 2H), 7.19 – 7.05 (m, 3H), 6.94 – 6.85 (m, 3H), 6.81 (d,  $J = 8.5$  Hz, 1H), 6.55 (d,  $J = 8.9$  Hz, 2H), 3.65 (s, 3H).

$^{13}\text{C NMR}$  (101 MHz,  $\text{CDCl}_3$ )  $\delta$  161.7, 153.9, 141.7, 137.0, 133.5, 132.5, 132.2, 132.1, 131.1, 129.0, 128.8, 128.7, 128.1, 126.9, 124.9, 123.7, 122.9, 119.9, 114.3, 111.3, 55.3.

**HPLC** (Daicel Chiralpak AD-H, hexane/*i*-PrOH = 80/20, flow rate 1.0 mL/min,  $\lambda = 254$  nm):  $t_1$  (major) = 13.033 min,  $t_2$  (minor) = 22.509 min.

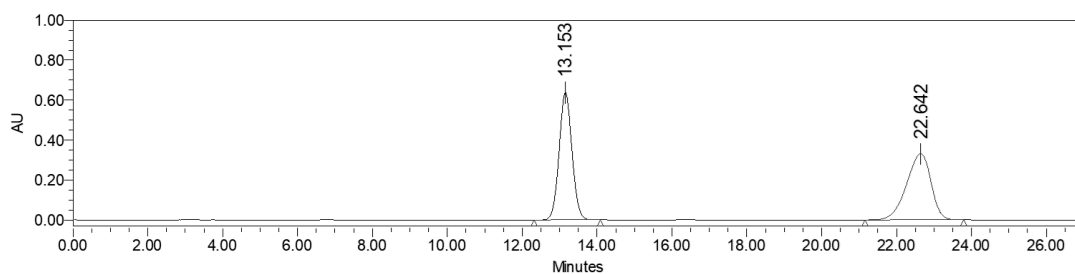

|   | Retention Time | Area     | % Area | Height |
|---|----------------|----------|--------|--------|
| 1 | 13.153         | 15165410 | 50.29  | 638064 |
| 2 | 22.642         | 14992151 | 49.71  | 331128 |

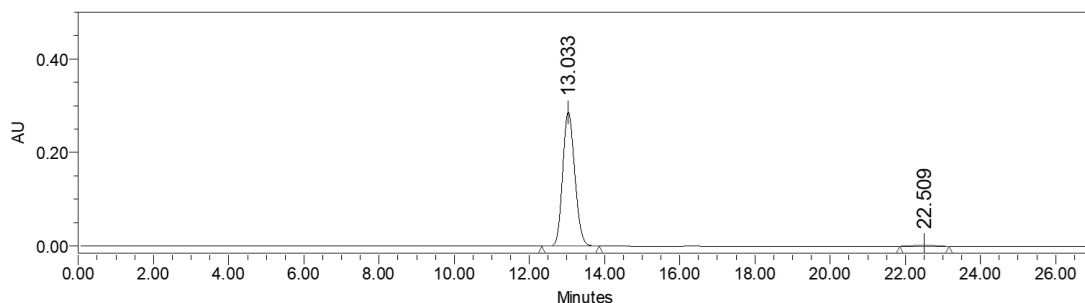

|   | Retention Time | Area    | % Area | Height |
|---|----------------|---------|--------|--------|
| 1 | 13.033         | 6402060 | 98.30  | 286639 |
| 2 | 22.509         | 110457  | 1.70   | 2997   |

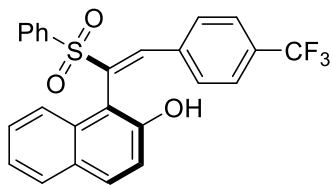

### 3ea

White foam. 78.1 mg. Yield = 86%.  $[\alpha]_D^{20} = -75.069^\circ$  (c = 1.0, CHCl<sub>3</sub>).

<sup>1</sup>H NMR (400 MHz, CDCl<sub>3</sub>) δ 8.33 (s, 1H), 7.84 (d, *J* = 8.9 Hz, 1H), 7.63 (d, *J* = 8.1 Hz, 1H), 7.58 (d, *J* = 7.9 Hz, 2H), 7.39 – 7.28 (m, 5H), 7.17 (t, *J* = 7.8 Hz, 2H), 7.13 – 7.07 (m, 3H), 6.92 – 6.86 (m, 1H), 6.76 (d, *J* = 8.5 Hz, 1H).

<sup>13</sup>C NMR (101 MHz, CDCl<sub>3</sub>) δ 153.8, 140.0, 137.6, 136.2, 135.6, 134.0, 132.7, 132.2, 131.9, 131.8, 130.4, 129.1, 128.9, 128.9, 128.2, 127.2, 125.7, 125.7, 123.9, 122.4, 119.9, 110.6.

<sup>19</sup>F NMR (376 MHz, CDCl<sub>3</sub>) δ -63.18.

HRMS (ESI) calcd for C<sub>25</sub>H<sub>18</sub>F<sub>3</sub>O<sub>3</sub>S<sup>+</sup> m/z [M + H]<sup>+</sup>: 455.0923; found: 455.0919.

HPLC (Daicel Chiralpak AD-H, hexane/*i*-PrOH = 80/20, flow rate 1.0 mL/min, λ = 254 nm): t<sub>1</sub> (major) = 7.745 min, t<sub>2</sub> (minor) = 10.334 min.

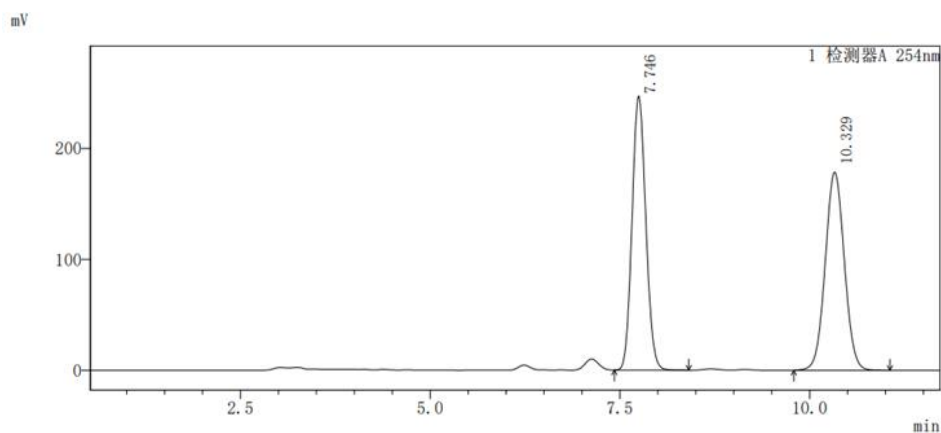

| 检测器A 254nm |        |         |         |        |
|------------|--------|---------|---------|--------|
| 峰号         | 保留时间   | 面积      | 面积%     | 高度     |
| 1          | 7.746  | 3121787 | 49.903  | 247099 |
| 2          | 10.329 | 3133874 | 50.097  | 178541 |
| 总计         |        | 6255661 | 100.000 | 425640 |

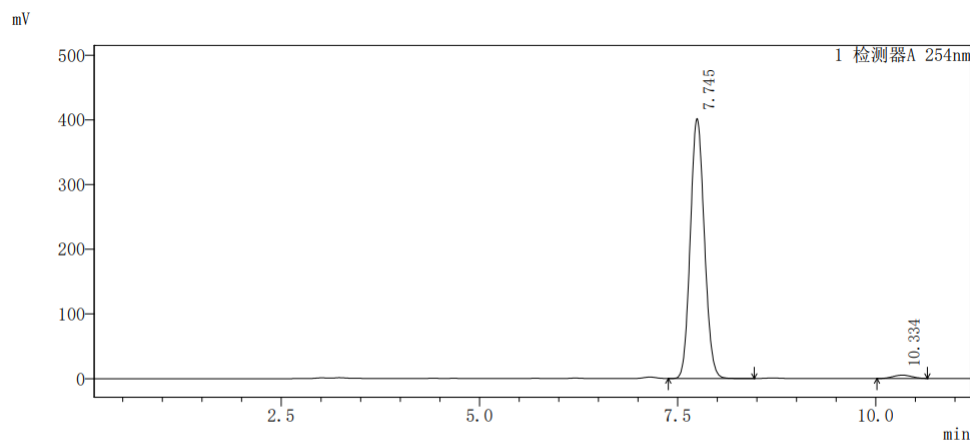

| 检测器A 254nm |        |         |         |        |
|------------|--------|---------|---------|--------|
| 峰号         | 保留时间   | 面积      | 面积%     | 高度     |
| 1          | 7.745  | 4955331 | 98.294  | 402187 |
| 2          | 10.334 | 85992   | 1.706   | 5261   |
| 总计         |        | 5041323 | 100.000 | 407448 |

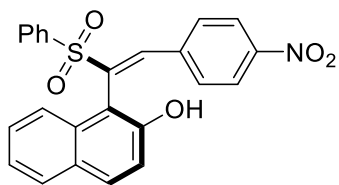

**3fa**

Yellow foam. 44.2 mg. Yield = 51%.  $[\alpha]_D^{20} = -111.737^\circ$   
( $c = 0.6$ ,  $\text{CHCl}_3$ ).

$^1\text{H NMR}$  (400 MHz,  $\text{CDCl}_3$ )  $\delta$  8.34 (s, 1H), 7.93 – 7.83 (m, 3H), 7.64 (d,  $J = 8.2$  Hz, 1H), 7.59 (d,  $J = 8.0$  Hz, 2H), 7.45 (s, 1H), 7.40 – 7.31 (m, 2H), 7.23 – 7.07 (m, 5H), 6.92 – 6.86 (m, 1H), 6.71 (d,  $J = 8.4$  Hz, 1H).

$^{13}\text{C NMR}$  (101 MHz,  $\text{CDCl}_3$ )  $\delta$  154.0, 148.4, 139.5, 138.9, 138.4, 135.9, 134.2, 132.9, 131.6, 130.8, 129.1, 129.0, 128.3, 127.3, 124.1, 123.8, 122.1, 120.0.

**HRMS** (ESI) calcd for  $\text{C}_{24}\text{H}_{16}\text{NO}_5\text{S}^-$   $m/z$   $[\text{M} - \text{H}]^-$ : 430.0755; found: 430.0757.

**HPLC** (Daicel Chiralpak AD-H, hexane/*i*-PrOH = 80/20, flow rate 1.0 mL/min,  $\lambda = 300$  nm):  $t_1$  (major) = 14.897 min,  $t_2$  (minor) = 21.124 min.

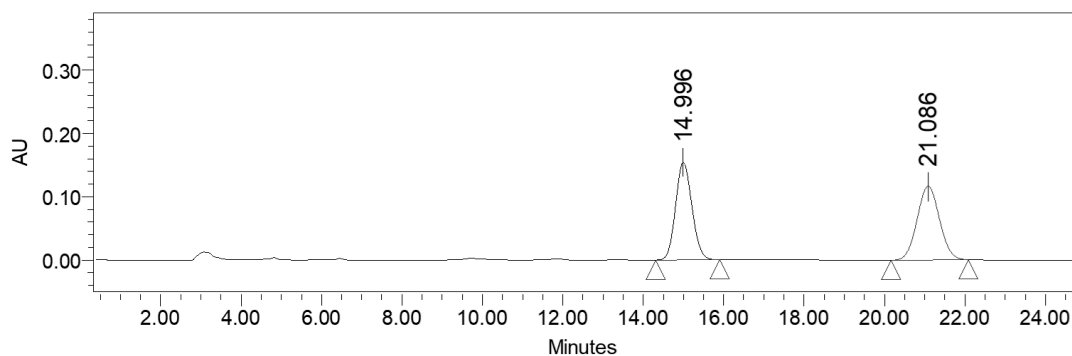

|   | Retention Time | Area    | % Area | Height |
|---|----------------|---------|--------|--------|
| 1 | 14.996         | 4355175 | 49.20  | 154199 |
| 2 | 21.086         | 4496913 | 50.80  | 116537 |

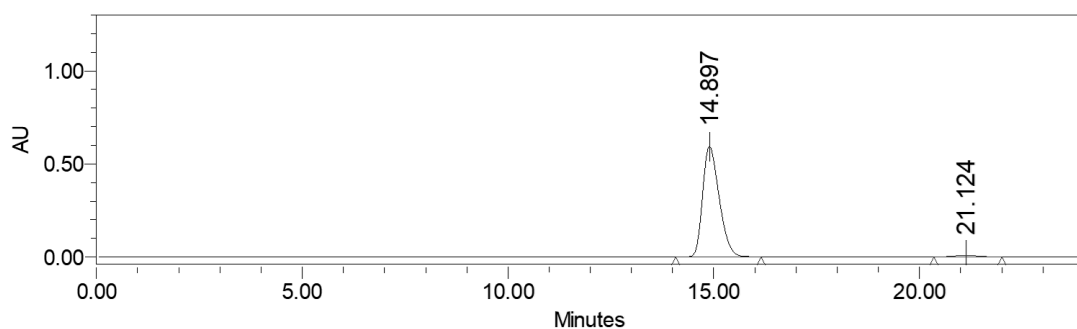

|   | Retention Time | Area     | % Area | Height |
|---|----------------|----------|--------|--------|
| 1 | 14.897         | 16539980 | 97.91  | 592865 |
| 2 | 21.124         | 353471   | 2.09   | 9449   |

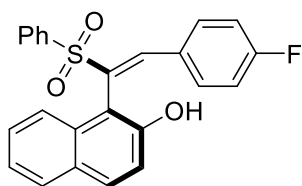

### 3ga

White foam. 49.7 mg. Yield = 61%.  $[\alpha]_D^{20} = -127.529^\circ$  ( $c = 1.0$ ,  $\text{CHCl}_3$ ).

$^1\text{H NMR}$  (400 MHz,  $\text{CDCl}_3$ )  $\delta$  8.28 (s, 1H), 7.83 (d,  $J = 8.9$  Hz, 1H), 7.63 (d,  $J = 8.1$  Hz, 1H), 7.59 – 7.54 (m, 2H), 7.43 (s, 1H), 7.35 – 7.29 (m, 2H), 7.15 (t,  $J = 7.9$  Hz, 2H), 7.12 – 7.06 (m, 1H), 7.00 – 6.94 (m, 2H), 6.91 – 6.85 (m, 1H), 6.80 – 6.69 (m, 3H).

$^{13}\text{C NMR}$  (101 MHz,  $\text{CDCl}_3$ )  $\delta$  163.9 (d,  $J = 254.4$  Hz), 153.9, 140.6, 136.6, 134.2 (d,  $J = 2.5$  Hz), 133.8, 132.6, 132.5, 132.4, 131.9, 129.0, 128.9, 128.8, 128.5 (d,  $J = 3.3$  Hz), 128.1, 127.0, 123.8, 122.6, 119.9, 116.1, 115.9, 110.8.

$^{19}\text{F NMR}$  (376 MHz,  $\text{CDCl}_3$ )  $\delta$  -107.68.

**HPLC** (Daicel Chiralpak AD-H, hexane/*i*-PrOH = 80/20, flow rate 1.0 mL/min,  $\lambda = 254$  nm):  $t_1$  (major) = 8.667 min,  $t_2$  (minor) = 12.128 min.

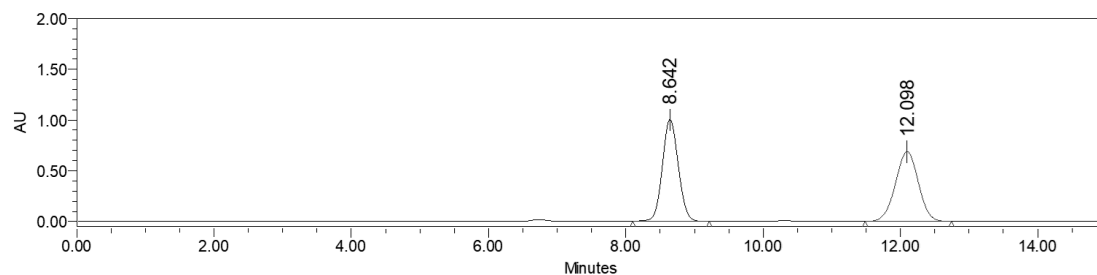

|   | Retention Time | Area     | % Area | Height  |
|---|----------------|----------|--------|---------|
| 1 | 8.642          | 16244855 | 50.51  | 1003618 |
| 2 | 12.098         | 15913848 | 49.49  | 686819  |

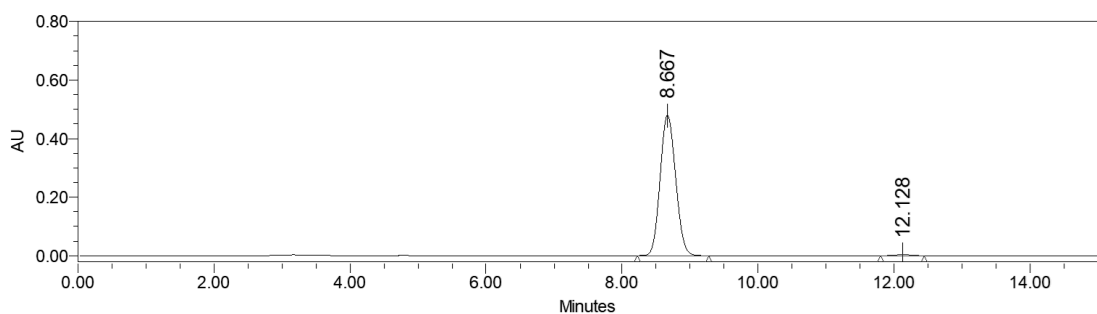

|   | Retention Time | Area    | % Area | Height |
|---|----------------|---------|--------|--------|
| 1 | 8.667          | 7594783 | 98.92  | 479169 |
| 2 | 12.128         | 82631   | 1.08   | 4286   |



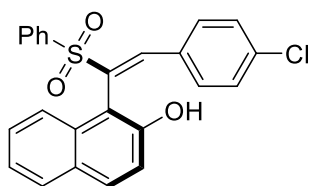

### 3ha

White foam. 59.8 mg. Yield = 71%.  $[\alpha]_D^{20} = +165.966^\circ$  (c = 1.0, CHCl<sub>3</sub>).

<sup>1</sup>H NMR (400 MHz, CDCl<sub>3</sub>) δ 8.26 (s, 1H), 7.82 (d, *J* = 8.9 Hz, 1H), 7.62 (d, *J* = 8.2 Hz, 1H), 7.59 – 7.54 (m, 2H), 7.43 (s, 1H), 7.35 – 7.28 (m, 2H), 7.19 – 7.13 (m, 2H), 7.12 – 7.06 (m, 1H), 7.03 – 6.98 (m, 2H), 6.92 – 6.85 (m, 3H), 6.76 (d, *J* = 8.5 Hz, 1H).

<sup>13</sup>C NMR (101 MHz, CDCl<sub>3</sub>) δ 153.9, 140.5, 137.0, 136.5, 135.3, 133.8, 132.5, 131.8, 131.5, 130.7, 129.1, 128.9, 128.8, 128.1, 127.1, 123.8, 122.5, 119.8, 110.7.

HPLC (Daicel Chiralpak AD-H, hexane/*i*-PrOH = 80/20, flow rate 1.0 mL/min, λ = 254 nm): t<sub>1</sub> (major) = 9.611 min, t<sub>2</sub> (minor) = 12.915 min.

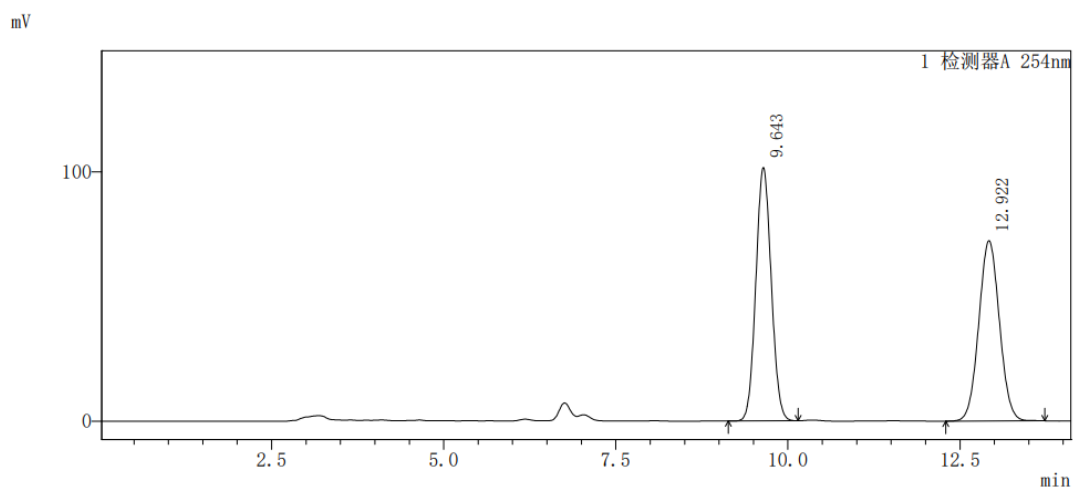

| 峰号 | 保留时间   | 面积      | 面积%     | 高度     |
|----|--------|---------|---------|--------|
| 1  | 9.643  | 1583561 | 51.187  | 101703 |
| 2  | 12.922 | 1510139 | 48.813  | 72397  |
| 总计 |        | 3093699 | 100.000 | 174100 |

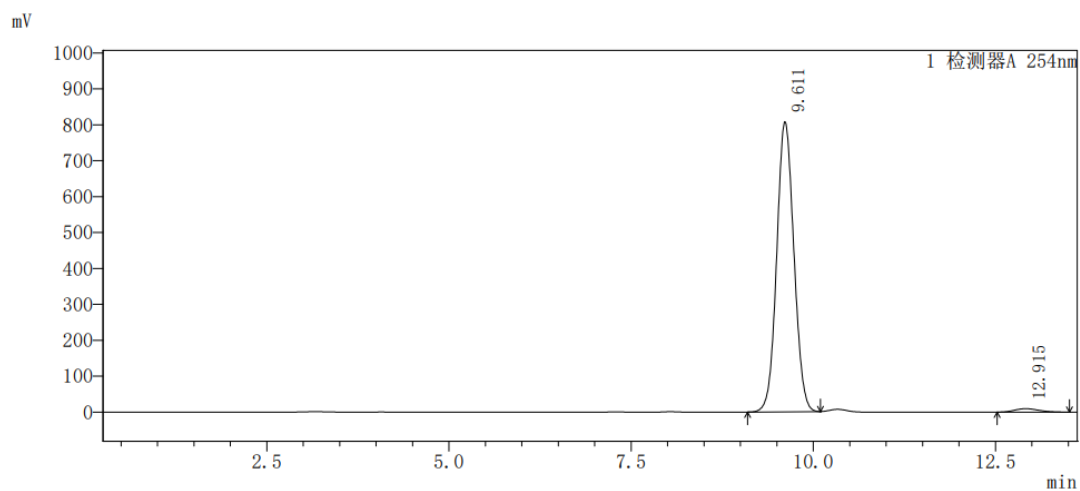

| 峰号 | 保留时间   | 面积       | 面积%     | 高度     |
|----|--------|----------|---------|--------|
| 1  | 9.611  | 13241619 | 98.347  | 808155 |
| 2  | 12.915 | 222522   | 1.653   | 9691   |
| 总计 |        | 13464141 | 100.000 | 817847 |

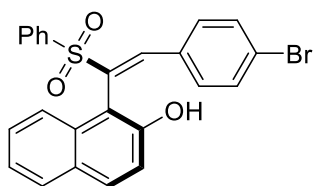

### 3ia

White foam. 60.3 mg. Yield = 65%.  $[\alpha]_D^{20} = -149.706^\circ$  (c = 1.0,  $\text{CHCl}_3$ ).

$^1\text{H NMR}$  (400 MHz,  $\text{CDCl}_3$ )  $\delta$  8.24 (s, 1H), 7.83 (d,  $J = 8.8$  Hz, 1H), 7.63 (d,  $J = 8.1$  Hz, 1H), 7.59 – 7.54 (m, 2H), 7.41 (s, 1H), 7.36 – 7.29 (m, 2H), 7.22 – 7.13 (m, 4H), 7.13 – 7.07 (m, 1H), 6.91 – 6.80 (m, 3H), 6.75 (d,  $J = 8.5$  Hz, 1H).

$^{13}\text{C NMR}$  (101 MHz,  $\text{CDCl}_3$ )  $\delta$  153.8, 140.5, 136.4, 135.4, 133.9, 132.5, 132.1, 131.8, 131.7, 131.1, 129.0, 128.8, 128.2, 127.1, 125.6, 123.8, 122.5, 119.9, 110.8.

**HRMS** (ESI) calcd for  $\text{C}_{24}\text{H}_{18}\text{BrO}_3\text{S}^+$   $m/z$   $[\text{M} + \text{H}]^+$ : 465.0155; found: 465.0155.

**HPLC** (Daicel Chiralpak AD-H, hexane/*i*-PrOH = 80/20, flow rate 1.0 mL/min,  $\lambda = 270$  nm):  $t_1$  (major) = 10.238 min,  $t_2$  (minor) = 14.069 min.

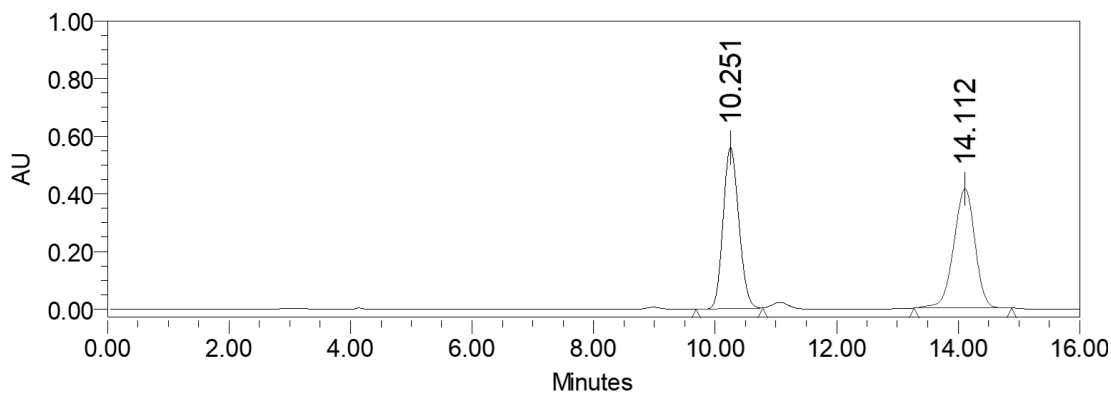

|   | Retention Time | Area     | % Area | Height |
|---|----------------|----------|--------|--------|
| 1 | 10.251         | 10010862 | 49.88  | 558510 |
| 2 | 14.112         | 10058385 | 50.12  | 414261 |

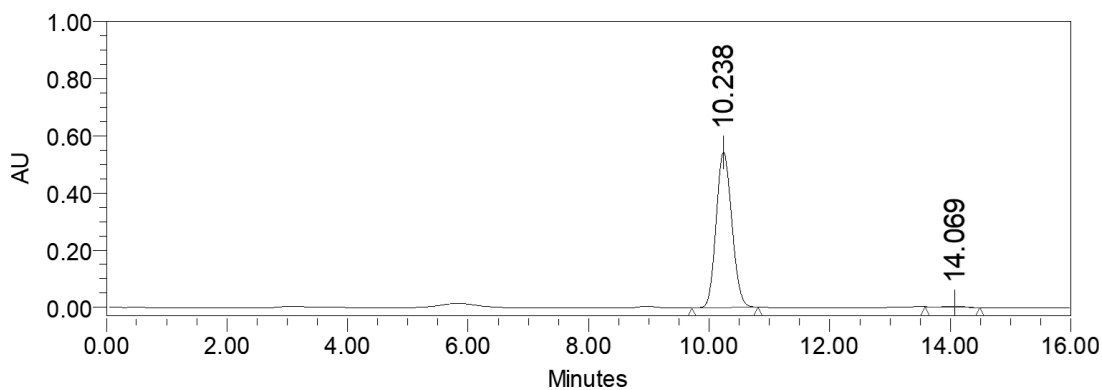

|   | Retention Time | Area    | % Area | Height |
|---|----------------|---------|--------|--------|
| 1 | 10.238         | 9815522 | 99.12  | 543938 |
| 2 | 14.069         | 86738   | 0.88   | 4313   |

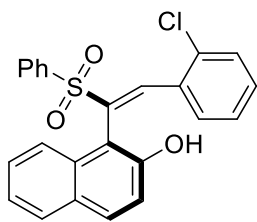

### 3ja

White foam. 70.0 mg. Yield = 83%.  $[\alpha]_D^{20} = +108.438^\circ$  ( $c = 1.0$ ,  $\text{CHCl}_3$ ).

$^1\text{H NMR}$  (400 MHz,  $\text{CDCl}_3$ )  $\delta$  8.66 (s, 1H), 7.74 (d,  $J = 8.9$  Hz, 1H), 7.65 – 7.57 (m, 3H), 7.54 (d,  $J = 8.1$  Hz, 1H), 7.36 – 7.30 (m, 1H), 7.30 – 7.22 (m, 2H), 7.21 – 7.15 (m, 2H), 7.06 – 6.98 (m, 2H), 6.93 – 6.87 (m, 1H), 6.80 (d,  $J = 8.5$  Hz, 1H), 6.75 (dd,  $J = 7.9, 1.8$  Hz, 1H), 6.71 – 6.66 (m, 1H).

$^{13}\text{C NMR}$  (101 MHz,  $\text{CDCl}_3$ )  $\delta$  154.5, 139.4, 137.6, 136.5, 135.1, 133.9, 132.3, 131.9, 131.2, 130.9, 129.5, 129.3, 129.0, 128.9, 128.9, 128.8, 128.0, 126.9, 126.8, 123.6, 122.5, 119.5, 110.7.

**HRMS** (ESI) calcd for  $\text{C}_{24}\text{H}_{18}\text{ClO}_3\text{S}^+$   $m/z$   $[\text{M} + \text{H}]^+$ : 421.0660; found: 421.0657.

**HPLC** (Daicel Chiralpak AD-H, hexane/*i*-PrOH = 80/20, flow rate 1.0 mL/min,  $\lambda = 254$  nm):  $t_1$  (major) = 7.394 min,  $t_2$  (minor) = 17.191 min.

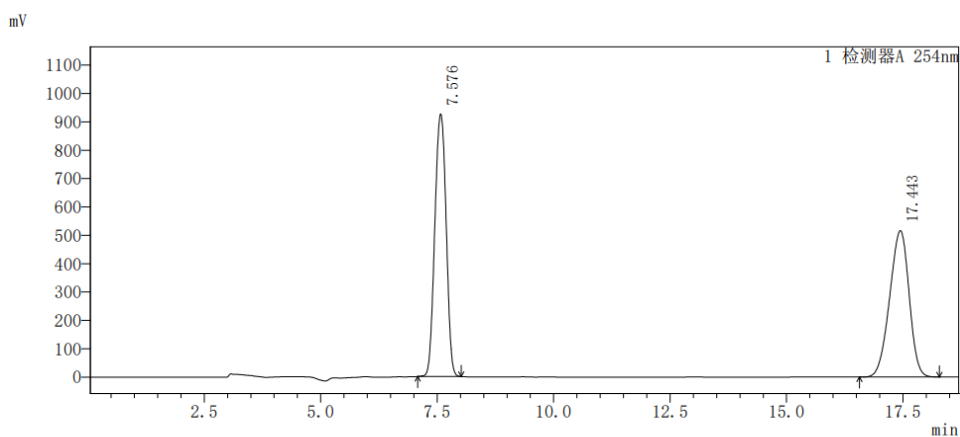

| 峰号 | 保留时间   | 面积       | 面积%     | 高度      |
|----|--------|----------|---------|---------|
| 1  | 7.576  | 15689849 | 51.113  | 926609  |
| 2  | 17.443 | 15006552 | 48.887  | 516360  |
| 总计 |        | 30696401 | 100.000 | 1442969 |

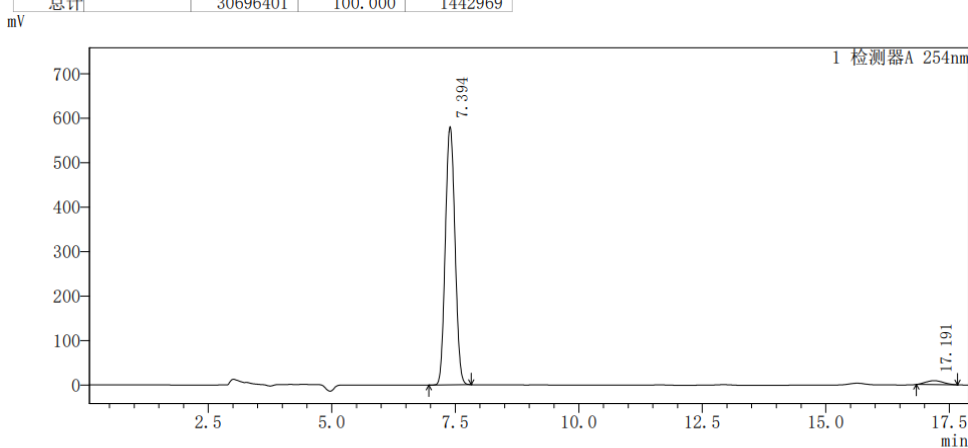

| 峰号 | 保留时间   | 面积      | 面积%     | 高度     |
|----|--------|---------|---------|--------|
| 1  | 7.394  | 7873254 | 97.308  | 581328 |
| 2  | 17.191 | 217793  | 2.692   | 8827   |
| 总计 |        | 8091047 | 100.000 | 590155 |

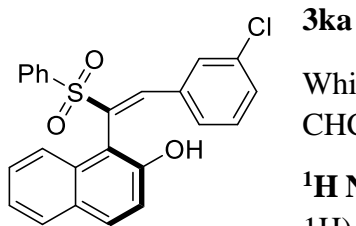

White foam. 55.4 mg. Yield = 66%.  $[\alpha]_D^{20} = -106.576^\circ$  (c = 1.0,  $\text{CHCl}_3$ ).

$^1\text{H NMR}$  (400 MHz,  $\text{CDCl}_3$ )  $\delta$  8.23 (s, 1H), 7.83 (d,  $J = 8.9$  Hz, 1H), 7.62 (d,  $J = 8.0$  Hz, 1H), 7.60 – 7.55 (m, 2H), 7.43 (s, 1H), 7.36 – 7.29 (m, 2H), 7.20 – 7.14 (m, 2H), 7.14 – 7.06 (m, 2H), 7.00 (t,  $J = 2.0$  Hz, 1H), 6.95 – 6.85 (m, 2H), 6.79 (d,  $J = 8.0$  Hz, 1H), 6.75 (d,  $J = 8.5$  Hz, 1H).

$^{13}\text{C NMR}$  (101 MHz,  $\text{CDCl}_3$ )  $\delta$  153.9, 140.3, 136.5, 136.4, 134.6, 134.0, 133.9, 132.6, 131.8, 130.7, 130.5, 129.9, 129.0, 129.0, 128.8, 128.2, 127.9, 127.1, 123.8, 122.5, 119.9, 110.7.

**HRMS** (ESI) calcd for  $\text{C}_{24}\text{H}_{18}\text{ClO}_3\text{S}^+$   $m/z$   $[\text{M} + \text{H}]^+$ : 421.0660; found: 421.0656.

**HPLC** (Daicel Chiralpak AD-H, hexane/*i*-PrOH = 80/20, flow rate 1.0 mL/min,  $\lambda = 254$  nm):  $t_1$  (major) = 8.105 min,  $t_2$  (minor) = 11.693 min.

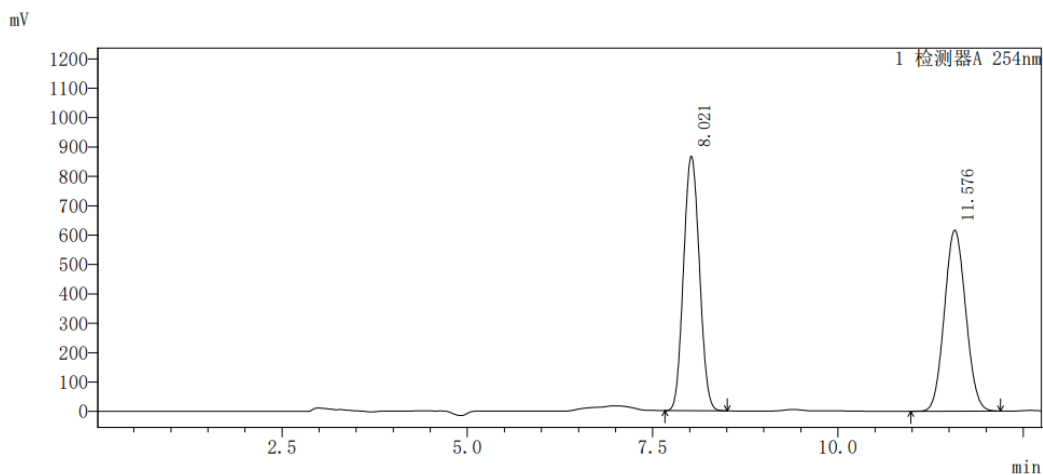

| 峰号 | 保留时间   | 面积       | 面积%     | 高度      |
|----|--------|----------|---------|---------|
| 1  | 8.021  | 12943341 | 51.209  | 866734  |
| 2  | 11.576 | 12331955 | 48.791  | 616673  |
| 总计 |        | 25275297 | 100.000 | 1483406 |

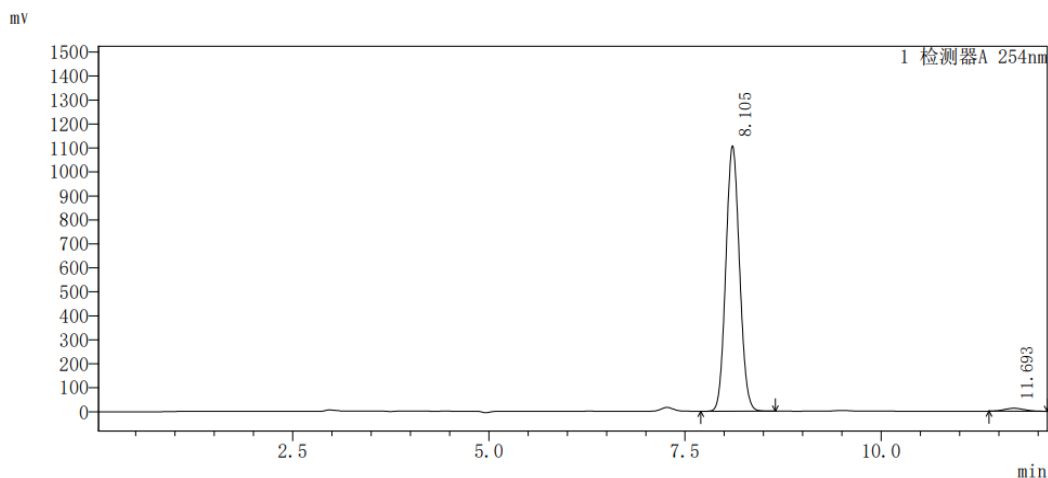

| 峰号 | 保留时间   | 面积       | 面积%     | 高度      |
|----|--------|----------|---------|---------|
| 1  | 8.105  | 13428255 | 98.426  | 1106844 |
| 2  | 11.693 | 214719   | 1.574   | 12299   |
| 总计 |        | 13642974 | 100.000 | 1119143 |

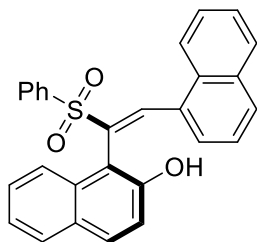

### 3la

White foam. 60.2 mg. Yield = 69%.  $[\alpha]_D^{20} = +202.712^\circ$  (c = 1.0,  $\text{CHCl}_3$ ).

$^1\text{H NMR}$  (400 MHz,  $\text{CDCl}_3$ )  $\delta$  9.13 (s, 1H), 8.26 (d, J = 8.4 Hz, 1H), 7.77 – 7.70 (m, 2H), 7.67 – 7.55 (m, 5H), 7.54 – 7.46 (m, 2H), 7.36 – 7.27 (m, 2H), 7.22 – 7.14 (m, 2H), 7.06 (d, J = 7.3 Hz, 1H), 7.00 – 6.92 (m, 2H), 6.79 (d, J = 8.4 Hz, 1H), 6.75 – 6.70 (m, 1H).

$^{13}\text{C NMR}$  (101 MHz,  $\text{CDCl}_3$ )  $\delta$  154.5, 139.9, 136.7, 136.6, 133.8, 133.4, 132.1, 132.0, 131.8, 130.8, 129.0, 129.0, 128.8, 128.8, 127.9, 127.2, 126.9, 126.7, 126.3, 125.3, 123.5, 123.2, 122.6, 119.6, 111.3.

**HPLC** (Daicel Chiralpak AD-H, hexane/*i*-PrOH = 80/20, flow rate 1.0 mL/min,  $\lambda = 220$  nm):  $t_1$  (major) = 11.811 min,  $t_2$  (minor) = 13.692 min.

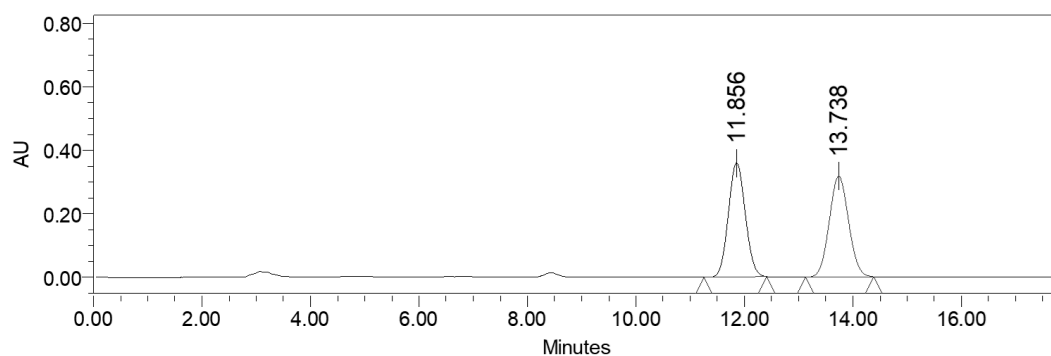

|   | Retention Time | Area    | % Area | Height |
|---|----------------|---------|--------|--------|
| 1 | 11.856         | 7783472 | 49.80  | 359280 |
| 2 | 13.738         | 7847164 | 50.20  | 317473 |

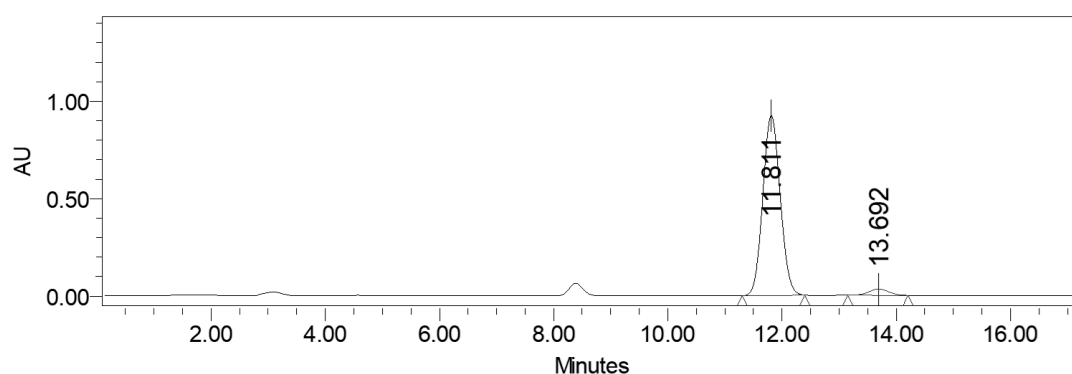

|   | Retention Time | Area     | % Area | Height |
|---|----------------|----------|--------|--------|
| 1 | 11.811         | 19517773 | 96.19  | 923589 |
| 2 | 13.692         | 773498   | 3.81   | 31975  |

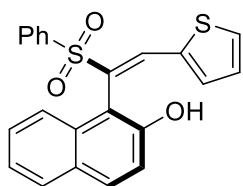

### 3ma

White foam. 62.8 mg. Yield = 80%.  $[\alpha]_D^{20} = -235.772^\circ$  ( $c = 0.3$ ,  $\text{CHCl}_3$ ).

$^1\text{H NMR}$  (400 MHz,  $\text{CDCl}_3$ )  $\delta$  8.48 (s, 1H), 7.88 (d,  $J = 8.9$  Hz, 1H), 7.67 (d,  $J = 8.1$  Hz, 1H), 7.64 – 7.60 (m, 2H), 7.40 – 7.30 (m, 2H), 7.28 – 7.09 (m, 6H), 6.93 – 6.85 (m, 2H), 6.79 (d,  $J = 8.5$  Hz, 1H).

$^{13}\text{C NMR}$  (101 MHz,  $\text{CDCl}_3$ )  $\delta$  154.3, 137.1, 135.7, 135.5, 135.2, 133.7, 133.1, 132.8, 132.7, 130.8, 129.4, 128.9, 128.9, 128.9, 128.2, 127.0, 126.9, 123.7, 122.4, 120.0, 110.1.

**HPLC** (Daicel Chiralpak AD-H, hexane/*i*-PrOH = 80/20, flow rate 1.0 mL/min,  $\lambda = 220$  nm):  $t_1$  (major) = 10.461 min,  $t_2$  (minor) = 22.949 min.

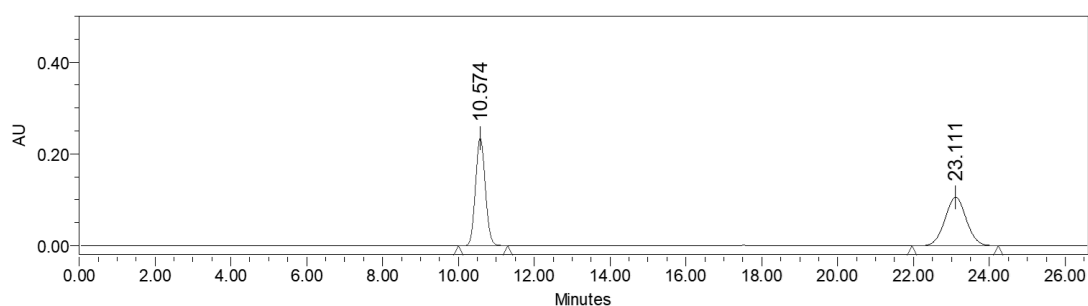

|   | Retention Time | Area    | % Area | Height |
|---|----------------|---------|--------|--------|
| 1 | 10.574         | 4199030 | 50.58  | 234221 |
| 2 | 23.111         | 4101960 | 49.42  | 105235 |

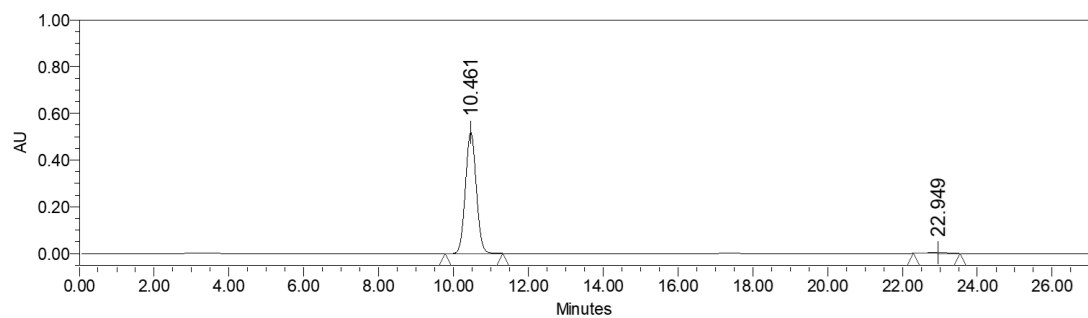

|   | Retention Time | Area     | % Area | Height |
|---|----------------|----------|--------|--------|
| 1 | 10.461         | 10437362 | 98.44  | 519086 |
| 2 | 22.949         | 165903   | 1.56   | 4270   |

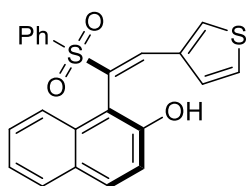

### 3na

White foam. 60.1 mg. Yield = 76%.  $[\alpha]_D^{20} = -162.932^\circ$  ( $c = 1.0$ ,  $\text{CHCl}_3$ ).

$^1\text{H NMR}$  (400 MHz,  $\text{CDCl}_3$ )  $\delta$  8.32 (s, 1H), 7.84 (d,  $J = 8.9$  Hz, 1H), 7.65 (d,  $J = 8.1$  Hz, 1H), 7.61 – 7.55 (m, 2H), 7.39 – 7.29 (m, 3H), 7.21 – 7.08 (m, 4H), 6.94 – 6.86 (m, 2H), 6.79 (d,  $J = 8.5$  Hz, 1H), 6.24 (dd,  $J = 5.1, 1.3$  Hz, 1H).

$^{13}\text{C NMR}$  (101 MHz,  $\text{CDCl}_3$ )  $\delta$  153.7, 136.9, 135.8, 134.3, 133.7, 132.5, 132.3, 131.8, 128.9, 128.8, 128.8, 128.1, 127.5, 127.0, 126.5, 123.8, 122.8, 119.9, 111.2.

**HPLC** (Daicel Chiralpak AD-H, hexane/*i*-PrOH = 80/20, flow rate 1.0 mL/min,  $\lambda = 254$  nm):  $t_1$  (major) = 10.901 min,  $t_2$  (minor) = 17.889 min.

mV

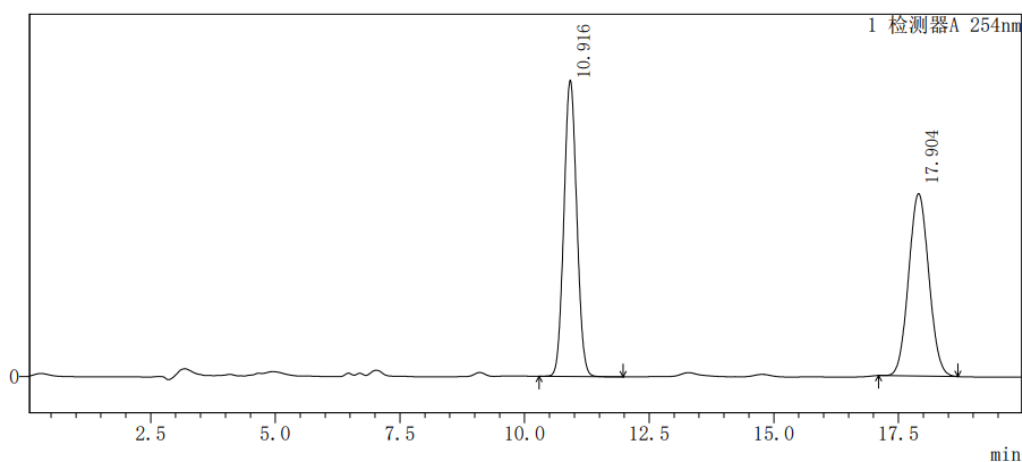

检测器A 254nm

| 峰号 | 保留时间   | 面积      | 面积%     | 高度    |
|----|--------|---------|---------|-------|
| 1  | 10.916 | 822733  | 50.766  | 45928 |
| 2  | 17.904 | 797900  | 49.234  | 28265 |
| 总计 |        | 1620632 | 100.000 | 74193 |

mV

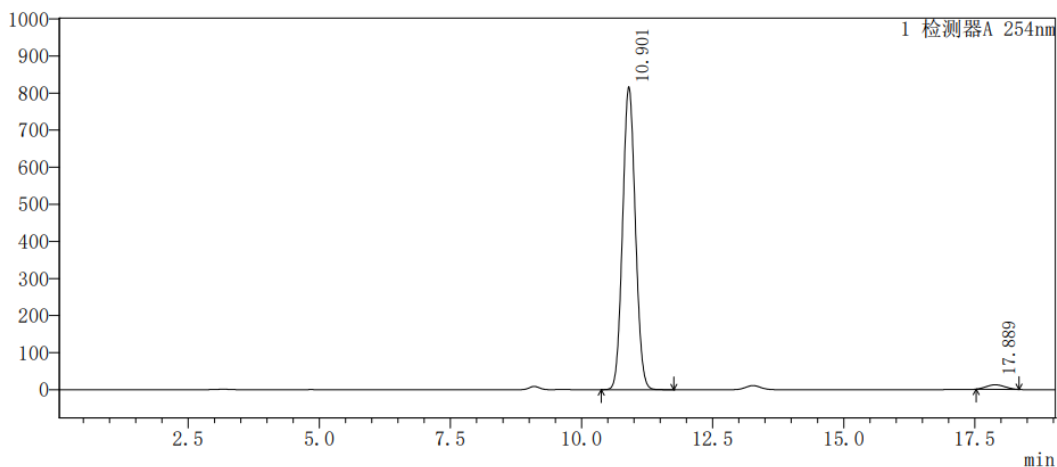

检测器A 254nm

| 峰号 | 保留时间   | 面积       | 面积%     | 高度     |
|----|--------|----------|---------|--------|
| 1  | 10.901 | 13827000 | 97.906  | 817180 |
| 2  | 17.889 | 295674   | 2.094   | 12062  |
| 总计 |        | 14122674 | 100.000 | 829242 |

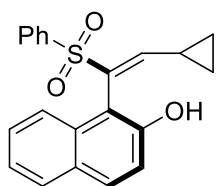

### 30a

White foam. 37.0 mg. Yield = 53%.  $[\alpha]_D^{20} = -37.021^\circ$  (c = 0.6, CHCl<sub>3</sub>).

<sup>1</sup>H NMR (400 MHz, CDCl<sub>3</sub>)  $\delta$  7.77 (d,  $J = 8.8$  Hz, 1H), 7.65 (d,  $J = 8.3$  Hz, 1H), 7.60 (s, 1H), 7.58 – 7.52 (m, 2H), 7.36 – 7.31 (m, 1H), 7.28 (d,  $J = 8.9$  Hz, 1H), 7.22 – 7.12 (m, 3H), 7.07 – 7.01 (m, 1H), 6.94 – 6.88 (m, 2H), 0.98 – 0.88 (m, 1H), 0.88 – 0.75 (m, 4H).

<sup>13</sup>C NMR (101 MHz, CDCl<sub>3</sub>)  $\delta$  154.2, 153.2, 137.4, 133.5, 132.9, 132.8, 131.8, 128.8, 128.8, 128.5, 128.1, 126.7, 123.4, 123.1, 119.8, 110.5, 13.0, 9.4, 9.2.

HRMS (ESI) calcd for C<sub>21</sub>H<sub>19</sub>O<sub>3</sub>S<sup>+</sup> m/z [M + H]<sup>+</sup>: 351.1049; found: 351.1051.

HPLC (Daicel Chiralpak AD-H, hexane/*i*-PrOH = 80/20, flow rate 1.0 mL/min,  $\lambda = 254$  nm):  $t_1$  (major) = 7.012 min,  $t_2$  (minor) = 10.928 min.

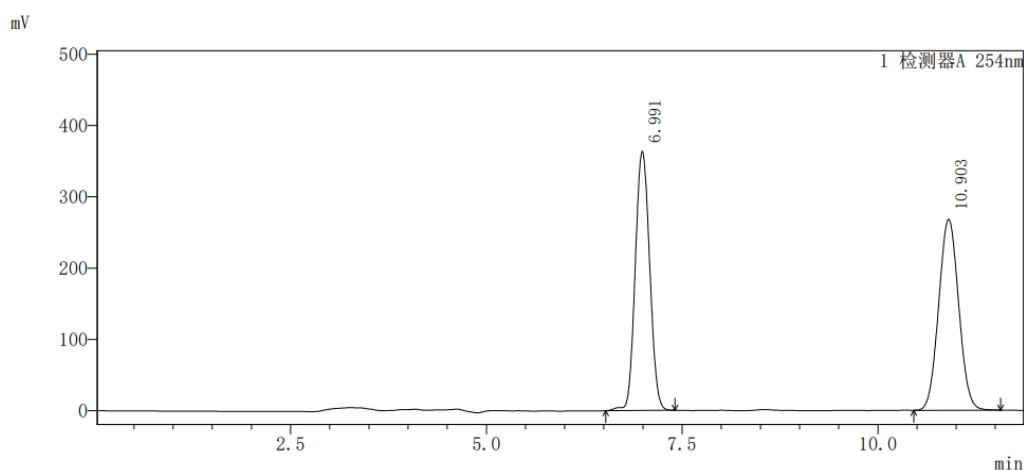

| 检测器A 254nm |        |         |         |        |
|------------|--------|---------|---------|--------|
| 峰号         | 保留时间   | 面积      | 面积%     | 高度     |
| 1          | 6.991  | 4668497 | 49.547  | 363352 |
| 2          | 10.903 | 4753813 | 50.453  | 267803 |
| 总计         |        | 9422310 | 100.000 | 631155 |

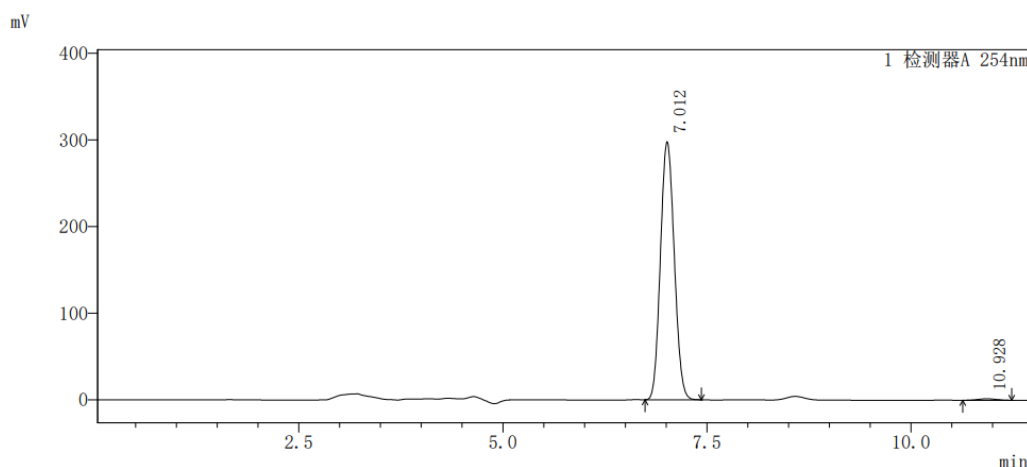

| 检测器A 254nm |        |         |         |        |
|------------|--------|---------|---------|--------|
| 峰号         | 保留时间   | 面积      | 面积%     | 高度     |
| 1          | 7.012  | 3511596 | 99.231  | 297675 |
| 2          | 10.928 | 27207   | 0.769   | 1687   |
| 总计         |        | 3538803 | 100.000 | 299363 |



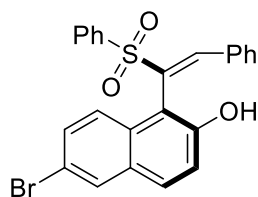

### 3pa

White foam. 72.4 mg. Yield = 78%.  $[\alpha]_D^{20} = -118.708^\circ$  (c = 1.0, CHCl<sub>3</sub>).

<sup>1</sup>H NMR (400 MHz, CDCl<sub>3</sub>) δ 8.31 (s, 1H), 7.78 (d, *J* = 2.1 Hz, 1H), 7.73 (d, *J* = 9.0 Hz, 1H), 7.60 – 7.53 (m, 2H), 7.47 (s, 1H), 7.43 – 7.34 (m, 1H), 7.33 (d, *J* = 8.9 Hz, 1H), 7.24 – 7.16 (m, 3H), 7.10 – 7.02 (m, 2H), 6.98 – 6.90 (m, 3H), 6.67 (d, *J* = 9.0 Hz, 1H).

<sup>13</sup>C NMR (101 MHz, CDCl<sub>3</sub>) δ 154.3, 142.4, 136.5, 134.0, 133.9, 132.0, 131.3, 131.1, 130.6, 130.4, 130.1, 128.9, 128.9, 128.9, 124.6, 121.1, 117.5, 111.4.

HPLC (Daicel Chiralpak AD-H, hexane/*i*-PrOH = 80/20, flow rate 1.0 mL/min, λ = 254 nm): t<sub>1</sub> (major) = 9.484 min, t<sub>2</sub> (minor) = 23.159 min.

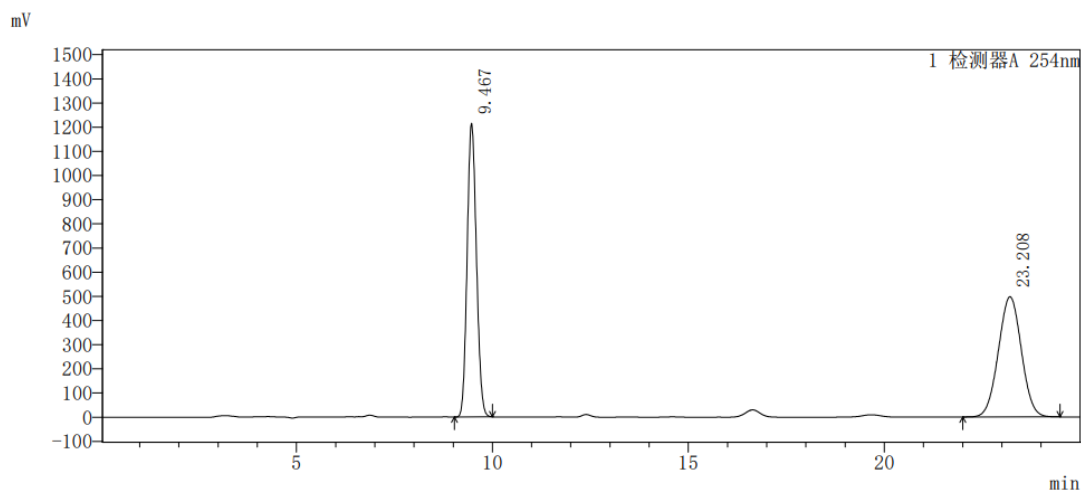

检测器A 254nm

| 峰号 | 保留时间   | 面积       | 面积%     | 高度      |
|----|--------|----------|---------|---------|
| 1  | 9.467  | 20018677 | 49.656  | 1215358 |
| 2  | 23.208 | 20296207 | 50.344  | 497456  |
| 总计 |        | 40314884 | 100.000 | 1712814 |

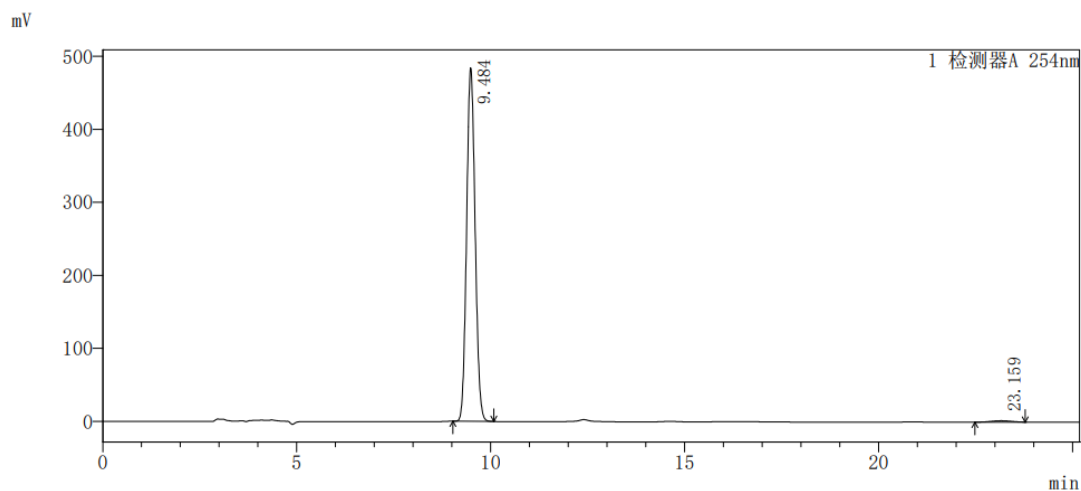

检测器A 254nm

| 峰号 | 保留时间   | 面积      | 面积%     | 高度     |
|----|--------|---------|---------|--------|
| 1  | 9.484  | 7388617 | 99.026  | 484183 |
| 2  | 23.159 | 72675   | 0.974   | 1979   |
| 总计 |        | 7461291 | 100.000 | 486162 |

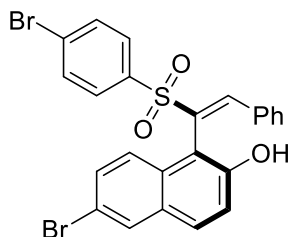

### 3pg

White foam. 101.5 mg. Yield = 93%.  $[\alpha]_D^{20} = -71.002^\circ$  (c = 1.0,  $\text{CHCl}_3$ ).

$^1\text{H NMR}$  (400 MHz,  $\text{CDCl}_3$ )  $\delta$  8.30 (s, 1H), 7.83 (d,  $J = 2.1$  Hz, 1H), 7.766 (d,  $J = 9.0$  Hz, 1H), 7.44 – 7.38 (m, 2H), 7.37 – 7.32 (m, 3H), 7.25 – 7.19 (m, 2H), 7.11 – 7.05 (m, 2H), 7.02 (dd,  $J = 9.0, 2.0$  Hz, 1H), 6.99 – 6.94 (m, 2H), 6.71 (d,  $J = 9.0$  Hz, 1H).

$^{13}\text{C NMR}$  (101 MHz,  $\text{CDCl}_3$ )  $\delta$  154.1, 142.9, 135.8, 133.5, 132.1, 131.8, 131.5, 131.3, 130.6, 130.4, 130.4, 130.3, 130.3, 130.1, 129.4, 128.9, 124.5, 120.9, 117.7, 110.9.

**HRMS** (ESI) calcd for  $\text{C}_{24}\text{H}_{17}\text{Br}_2\text{O}_3\text{S}^+$  m/z  $[\text{M} + \text{H}]^+$ : 542.9260; found: 542.9257.

**HPLC** (Daicel Chiralpak AD-H, hexane/*i*-PrOH = 80/20, flow rate 1.0 mL/min,  $\lambda = 254$  nm):  $t_1$  (major) = 8.282 min,  $t_2$  (minor) = 15.163 min.

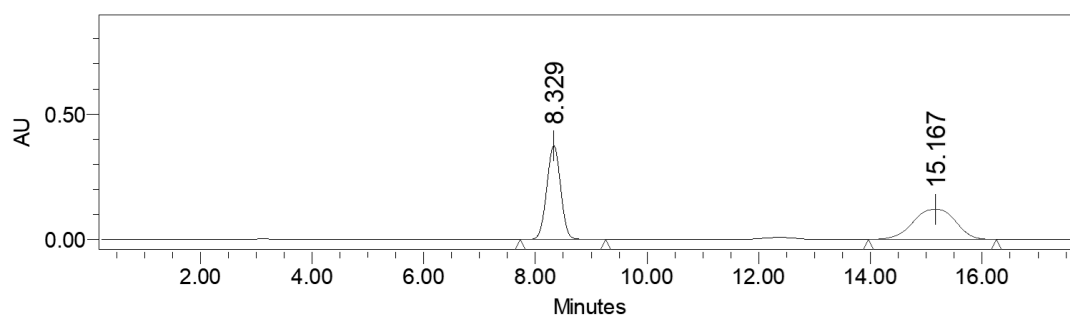

|   | Retention Time | Area    | % Area | Height |
|---|----------------|---------|--------|--------|
| 1 | 8.329          | 6431975 | 50.50  | 373488 |
| 2 | 15.167         | 6305561 | 49.50  | 119864 |

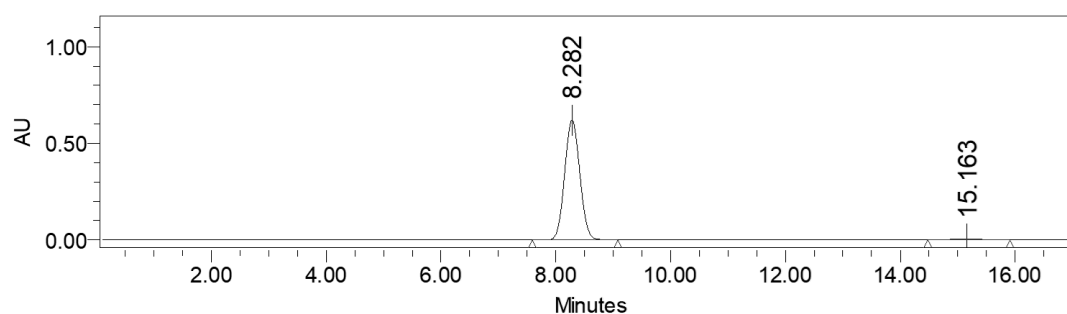

|   | Retention Time | Area     | % Area | Height |
|---|----------------|----------|--------|--------|
| 1 | 8.282          | 11357966 | 98.32  | 620948 |
| 2 | 15.163         | 194297   | 1.68   | 4230   |

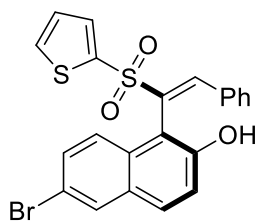

### 3ph

White foam. 87.5 mg. Yield = 93%.  $[\alpha]_D^{20} = -75.740^\circ$  ( $c = 1.0$ ,  $\text{CHCl}_3$ ).

$^1\text{H NMR}$  (400 MHz,  $\text{CDCl}_3$ )  $\delta$  8.31 (s, 1H), 7.83 (d,  $J = 2.1$  Hz, 1H), 7.77 (d,  $J = 8.9$  Hz, 1H), 7.46 (dd,  $J = 5.0, 1.3$  Hz, 1H), 7.38 – 7.30 (m, 2H), 7.26 (dd,  $J = 3.8, 1.4$  Hz, 1H), 7.23 – 7.16 (m, 1H), 7.10 – 7.01 (m, 3H), 7.00 – 6.94 (m, 2H), 6.83 (d,  $J = 9.0$  Hz, 1H), 6.79 (dd,  $J = 5.0, 3.8$  Hz, 1H)

$^{13}\text{C NMR}$  (101 MHz,  $\text{CDCl}_3$ )  $\delta$  154.4, 142.2, 137.0, 135.6, 135.4, 134.0, 131.9, 131.4, 131.2, 131.1, 130.4, 130.3, 130.2, 130.1, 128.9, 128.0, 124.4, 121.1, 117.6, 111.2.

**HRMS** (ESI) calcd for  $\text{C}_{22}\text{H}_{16}\text{BrO}_3\text{S}_2^+$   $m/z$   $[\text{M} + \text{H}]^+$ : 470.9719; found: 470.9714.

**HPLC** (Daicel Chiralpak AD-H, hexane/*i*-PrOH = 80/20, flow rate 1.0 mL/min,  $\lambda = 280$  nm):  $t_1$  (major) = 9.095 min,  $t_2$  (minor) = 20.096 min.

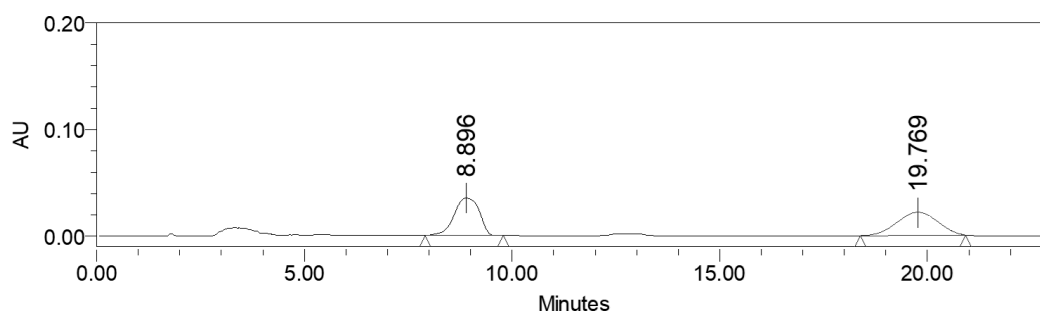

|   | Retention Time | Area    | % Area | Height |
|---|----------------|---------|--------|--------|
| 1 | 8.896          | 1482985 | 50.04  | 35216  |
| 2 | 19.769         | 1480687 | 49.96  | 21752  |

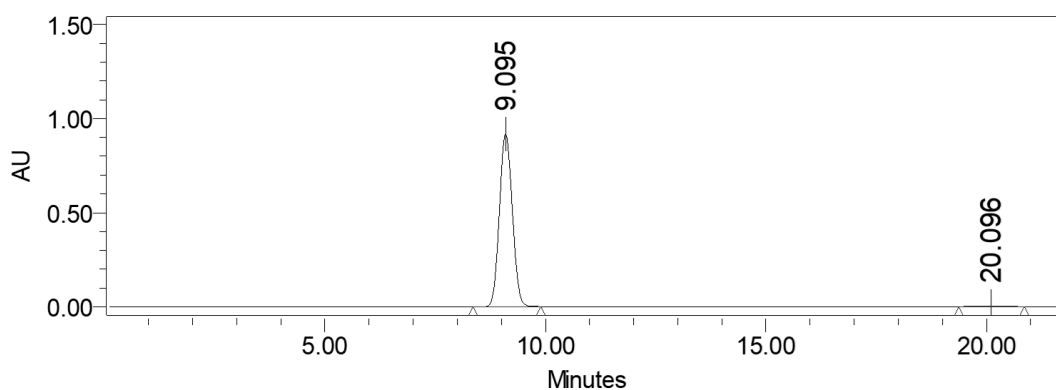

|   | Retention Time | Area     | % Area | Height |
|---|----------------|----------|--------|--------|
| 1 | 9.095          | 18641788 | 99.08  | 917405 |
| 2 | 20.096         | 173007   | 0.92   | 3409   |

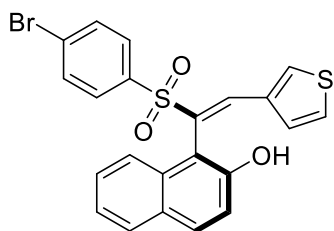

### 3ng

White foam. 67.3 mg. Yield = 71%.  $[\alpha]_D^{20} = -35.498^\circ$  (c = 1.0, CHCl<sub>3</sub>).

<sup>1</sup>H NMR (400 MHz, CDCl<sub>3</sub>) δ 8.32 (s, 1H), 7.86 (d, *J* = 9.0 Hz, 1H), 7.69 (d, *J* = 8.1 Hz, 1H), 7.44 – 7.39 (m, 2H), 7.35 – 7.29 (m, 3H), 7.23 – 7.13 (m, 3H), 7.01 – 6.92 (m, 2H), 6.81 (d, *J* = 8.5 Hz, 1H), 6.27 (dd, *J* = 5.2, 1.1 Hz, 1H).

<sup>13</sup>C NMR (101 MHz, CDCl<sub>3</sub>) δ 153.8, 136.2, 136.2, 134.2, 132.5, 132.2, 132.1, 132.1, 130.3, 129.1, 129.0, 128.3, 127.4, 127.3, 126.7, 124.0, 122.6, 119.8, 110.8.

HRMS (ESI) calcd for C<sub>22</sub>H<sub>16</sub>BrO<sub>3</sub>S<sub>2</sub><sup>+</sup> m/z [M + H]<sup>+</sup>: 470.9719; found: 470.9717.

HPLC (Daicel Chiralpak AD-H, hexane/*i*-PrOH = 80/20, flow rate 1.0 mL/min, λ = 254 nm): t<sub>1</sub> (major) = 9.743 min, t<sub>2</sub> (minor) = 13.859 min.

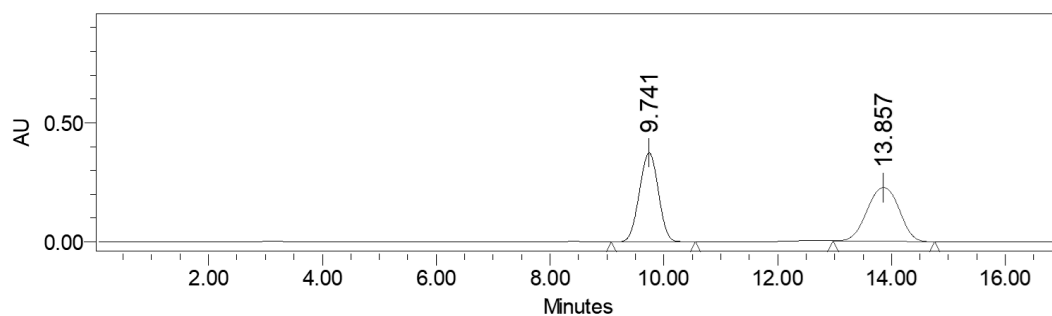

|   | Retention Time | Area    | % Area | Height |
|---|----------------|---------|--------|--------|
| 1 | 9.741          | 8666025 | 49.58  | 374032 |
| 2 | 13.857         | 8811702 | 50.42  | 225525 |

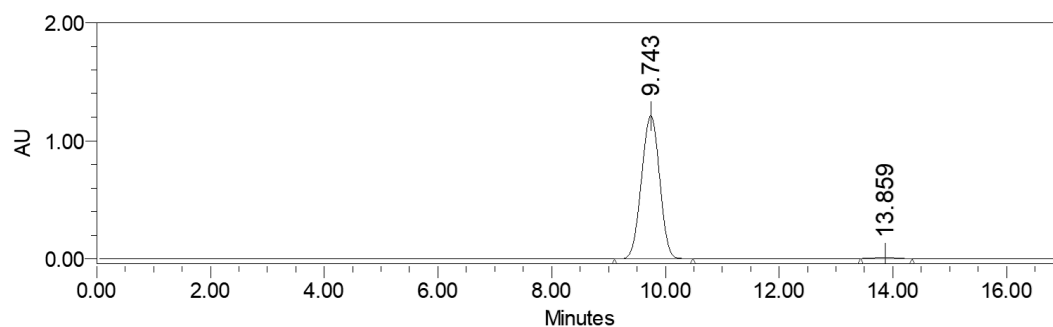

|   | Retention Time | Area     | % Area | Height  |
|---|----------------|----------|--------|---------|
| 1 | 9.743          | 26827499 | 98.74  | 1210079 |
| 2 | 13.859         | 343038   | 1.26   | 11125   |

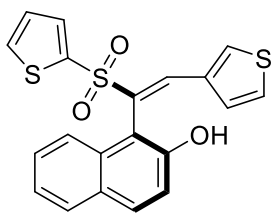

### 3nh

White foam. 58.1 mg. Yield = 73%.  $[\alpha]_D^{20} = -109.573^\circ$  ( $c = 1.0$ ,  $\text{CHCl}_3$ ).

$^1\text{H NMR}$  (400 MHz,  $\text{CDCl}_3$ )  $\delta$  8.31 (s, 1H), 7.87 (d,  $J = 9.0$  Hz, 1H), 7.71 (d,  $J = 8.4$  Hz, 1H), 7.43 (dt,  $J = 4.9, 1.1$  Hz, 2H), 7.31 (dd,  $J = 8.9, 1.5$  Hz, 1H), 7.27 – 7.24 (m, 1H), 7.21 – 7.14 (m, 2H), 7.05 – 6.97 (m, 2H), 6.95 – 6.91 (m, 1H), 6.81 – 6.74 (m, 1H), 6.28 (dd,  $J = 5.2, 1.2$  Hz, 1H).

$^{13}\text{C NMR}$  (101 MHz,  $\text{CDCl}_3$ )  $\delta$  153.9, 137.8, 135.4, 135.3, 134.8, 134.3, 132.9, 132.3, 131.7, 128.8, 128.2, 127.8, 127.4, 127.2, 126.5, 123.8, 122.6, 119.7, 119.7, 110.8.

**HRMS** (ESI) calcd for  $\text{C}_{20}\text{H}_{15}\text{O}_3\text{S}_3^+$   $m/z$   $[\text{M} + \text{H}]^+$ : 399.0178; found: 399.0176.

**HPLC** (Daicel Chiralpak AD-H, hexane/*i*-PrOH = 80/20, flow rate 1.0 mL/min,  $\lambda = 230$  nm):  $t_1$  (major) = 11.996 min,  $t_2$  (minor) = 20.660 min.

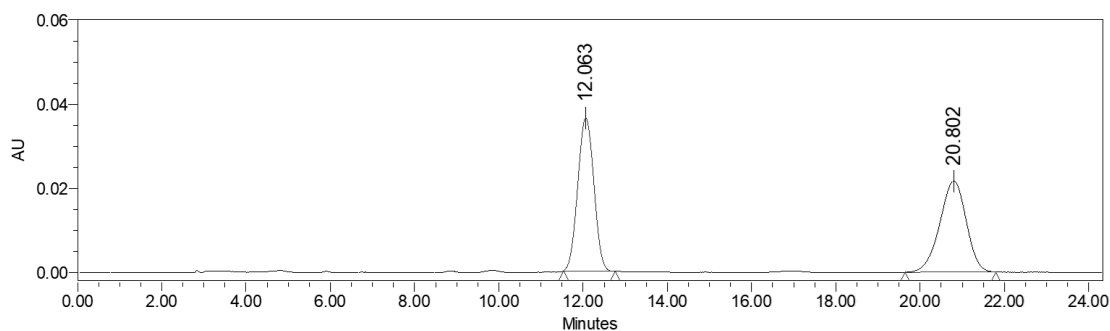

|   | Retention Time | Area   | % Area | Height |
|---|----------------|--------|--------|--------|
| 1 | 12.063         | 963767 | 50.54  | 36341  |
| 2 | 20.802         | 943041 | 49.46  | 21649  |

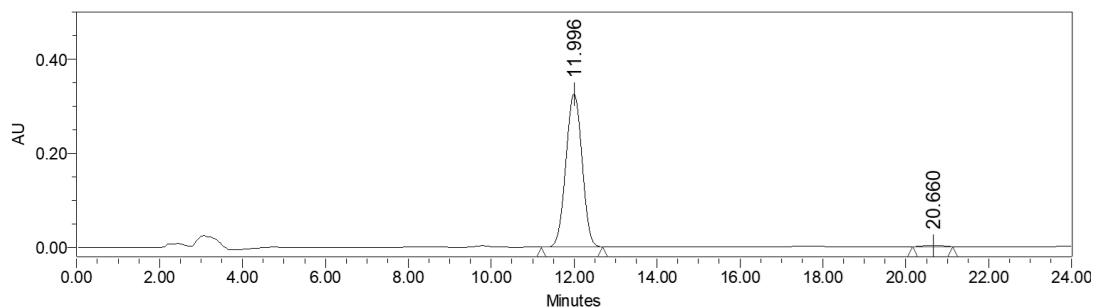

|   | Retention Time | Area    | % Area | Height |
|---|----------------|---------|--------|--------|
| 1 | 11.996         | 8810487 | 98.91  | 325097 |
| 2 | 20.660         | 97160   | 1.09   | 2913   |

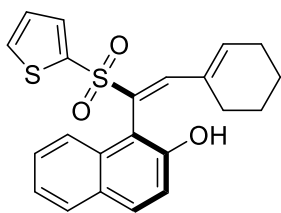

### 3qh

White foam. 49.5 mg. Yield = 62%.  $[\alpha]_D^{20} = +14.146^\circ$  (c = 1.0,  $\text{CHCl}_3$ ).

$^1\text{H NMR}$  (400 MHz,  $\text{CDCl}_3$ )  $\delta$  7.86 (s, 1H), 7.78 (d,  $J = 8.9$  Hz, 1H), 7.66 (d,  $J = 8.1$  Hz, 1H), 7.37 (dd,  $J = 5.0, 1.4$  Hz, 1H), 7.24 (d,  $J = 8.9$  Hz, 1H), 7.21 – 7.15 (m, 1H), 7.15 – 7.06 (m, 3H), 7.00 (d,  $J = 8.4$  Hz, 1H), 6.70 (dd,  $J = 4.9, 3.8$  Hz, 1H), 6.40 (t,  $J = 4.2$  Hz, 1H), 2.220 – 2.10 (m, 2H), 1.51 – 1.37 (m, 2H), 1.23 – 1.12 (m, 3H), 0.96 – 0.83 (m, 1H).

$^{13}\text{C NMR}$  (101 MHz,  $\text{CDCl}_3$ )  $\delta$  154.0, 146.0, 144.8, 137.9, 135.1, 134.6, 134.5, 132.0, 130.0, 128.3, 128.0, 127.6, 126.9, 123.5, 123.0, 119.3, 111.8, 27.0, 24.5, 22.1, 21.1.

**HRMS** (ESI) calcd for  $\text{C}_{22}\text{H}_{21}\text{O}_3\text{S}_2^+$  m/z  $[\text{M} + \text{H}]^+$ : 397.0927; found: 397.0923.

**HPLC** (Daicel Chiralpak AD-H, hexane/*i*-PrOH = 80/20, flow rate 1.0 mL/min,  $\lambda = 300$  nm):  $t_1$  (major) = 6.744 min,  $t_2$  (minor) = 9.568 min.

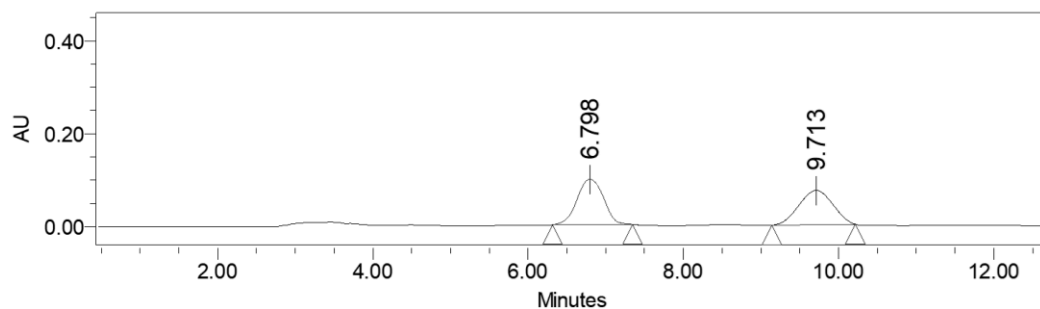

|   | Retention Time | Area    | % Area | Height |
|---|----------------|---------|--------|--------|
| 1 | 6.798          | 2311505 | 50.80  | 97655  |
| 2 | 9.713          | 2239130 | 49.20  | 73982  |

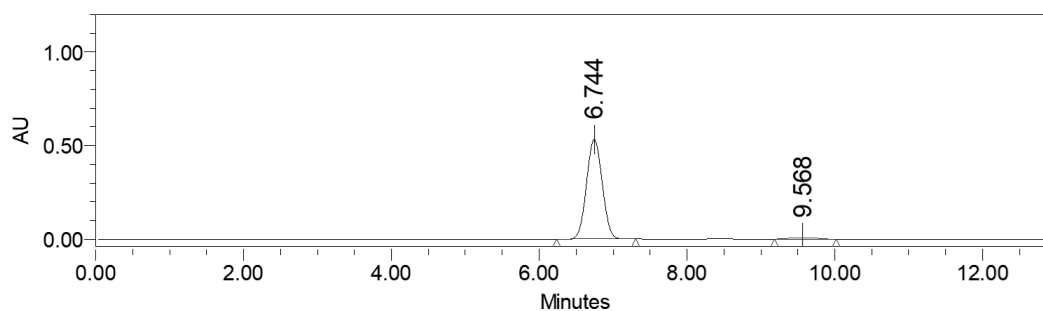

|   | Retention Time | Area    | % Area | Height |
|---|----------------|---------|--------|--------|
| 1 | 6.744          | 7848550 | 97.70  | 532342 |
| 2 | 9.568          | 184521  | 2.30   | 7641   |

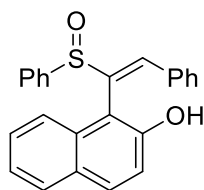

4

Yellow oil. 107.9 mg. Yield = 57%.

**<sup>1</sup>H NMR** (400 MHz, DMSO)  $\delta$  10.37 (s, 1H), 7.86 (d,  $J$  = 8.9 Hz, 1H), 7.66 (d,  $J$  = 8.0 Hz, 1H), 7.61 (s, 1H), 7.32 (d,  $J$  = 8.9 Hz, 1H), 7.25 – 7.17 (m, 1H), 7.144 – 7.05 (m, 9H), 7.04 – 6.99 (m, 1H), 6.74 – 6.66 (m, 1H), 6.41 (d,  $J$  = 8.5 Hz, 1H).

**<sup>13</sup>C NMR** (101 MHz, DMSO)  $\delta$  153.9, 142.5, 142.1, 134.0, 131.7, 131.4, 130.9, 128.7, 128.6, 128.5, 128.2, 127.9, 127.5, 126.2, 124.6, 122.7, 122.6, 118.1, 110.3.

**HRMS** (ESI) calcd for C<sub>24</sub>H<sub>19</sub>O<sub>2</sub>S<sup>+</sup> m/z [M + H]<sup>+</sup>: 371.1100; found: 371.1093.

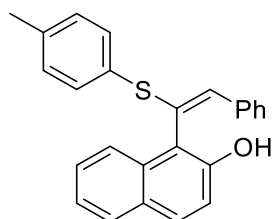

5

White foam. 203.0 mg. Yield = 55%. (*E/Z* mixture of ratio: 1/0.4).

**<sup>1</sup>H NMR** (400 MHz, CDCl<sub>3</sub>)  $\delta$  7.85 (d,  $J$  = 8.4 Hz, 0.49H), 7.77-7.66 (m, 5.48H), 7.59 (d,  $J$  = 8.8 Hz, 0.47H), 7.52 – 7.48 (m, 0.39H), 7.48 – 7.43 (m, 1.04H), 7.43 – 7.38 (m, 1.04H), 7.37 – 7.29 (m, 5.51H), 7.18 – 7.11 (m, 3.24H), 7.11 – 7.04 (m, 1.18H), 6.99 (d,  $J$  = 8.0 Hz, 2.00H), 6.91 (d,  $J$  = 8.8 Hz, 0.45H), 6.73 (d,  $J$  = 8.0 Hz, 1.99H), 6.69 (s, 0.42H), 5.95 (s, 0.94H), 5.27 (s, 0.39H), 2.29 (s, 1.27H), 2.07 (s, 3.00H).

**<sup>13</sup>C NMR** (101 MHz, CDCl<sub>3</sub>)  $\delta$  149.9, 149.5, 143.9, 142.9, 139.5, 138.6, 136.9, 136.2, 133.5, 132.9, 130.9, 130.4, 130.0, 129.9, 129.9, 129.5, 129.5, 129.2, 129.1, 129.0, 129.0, 128.8, 128.7, 128.6, 128.5, 128.4, 128.4, 128.1, 126.9, 126.6, 126.0, 125.7, 125.3, 124.8, 124.1, 123.9, 123.6, 120.5, 118.4, 117.9, 116.4, 116.0, 112.4, 100.6, 21.3, 21.0.

**HRMS** (ESI) calcd for C<sub>25</sub>H<sub>20</sub>NaOS<sup>+</sup> m/z [M + Na]<sup>+</sup>: 391.1127; found: 391.1128.

## 7. X-ray crystal structures.

The crystal of compound (**S**)-**3aa** was obtained by slow evaporation of petroleum ether and dichloromethane solution at room temperature.

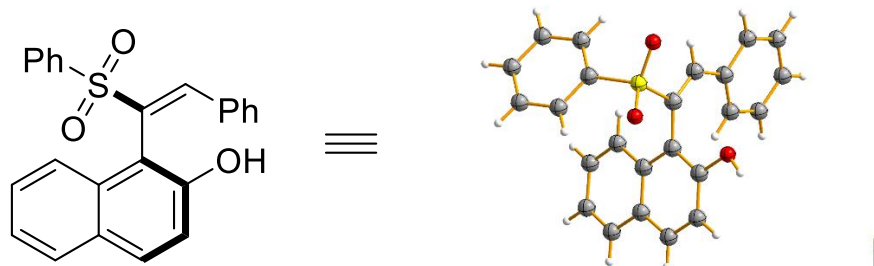

CCDC 2251662

Atomic displacement parameters for non-H atoms are at 30% probability level.

### Crystal data and structure refinement for B22071706A0089\_0m.

|                                             |                                                               |
|---------------------------------------------|---------------------------------------------------------------|
| Identification code                         | B22071706A0089_0m                                             |
| Empirical formula                           | C <sub>24</sub> H <sub>18</sub> O <sub>3</sub> S              |
| Formula weight                              | 386.44                                                        |
| Temperature/K                               | 150.0                                                         |
| Crystal system                              | orthorhombic                                                  |
| Space group                                 | P2 <sub>1</sub> 2 <sub>1</sub> 2 <sub>1</sub>                 |
| a/Å                                         | 9.6878(5)                                                     |
| b/Å                                         | 9.8802(5)                                                     |
| c/Å                                         | 19.6818(10)                                                   |
| α/°                                         | 90                                                            |
| β/°                                         | 90                                                            |
| γ/°                                         | 90                                                            |
| Volume/Å <sup>3</sup>                       | 1883.89(17)                                                   |
| Z                                           | 4                                                             |
| ρ <sub>calc</sub> /cm <sup>3</sup>          | 1.363                                                         |
| μ/mm <sup>-1</sup>                          | 1.108                                                         |
| F(000)                                      | 808.0                                                         |
| Crystal size/mm <sup>3</sup>                | 0.06 × 0.05 × 0.03                                            |
| Radiation                                   | GaKα (λ = 1.34138)                                            |
| 2θ range for data collection/°              | 7.816 to 115.984                                              |
| Index ranges                                | -12 ≤ h ≤ 12, -12 ≤ k ≤ 12, -24 ≤ l ≤ 24                      |
| Reflections collected                       | 42198                                                         |
| Independent reflections                     | 3893 [R <sub>int</sub> = 0.0397, R <sub>sigma</sub> = 0.0274] |
| Data/restraints/parameters                  | 3893/0/254                                                    |
| Goodness-of-fit on F <sup>2</sup>           | 1.090                                                         |
| Final R indexes [I ≥ 2σ (I)]                | R <sub>1</sub> = 0.0336, wR <sub>2</sub> = 0.0891             |
| Final R indexes [all data]                  | R <sub>1</sub> = 0.0337, wR <sub>2</sub> = 0.0892             |
| Largest diff. peak/hole / e Å <sup>-3</sup> | 0.70/-0.37                                                    |



Flack parameter

0.079(4)

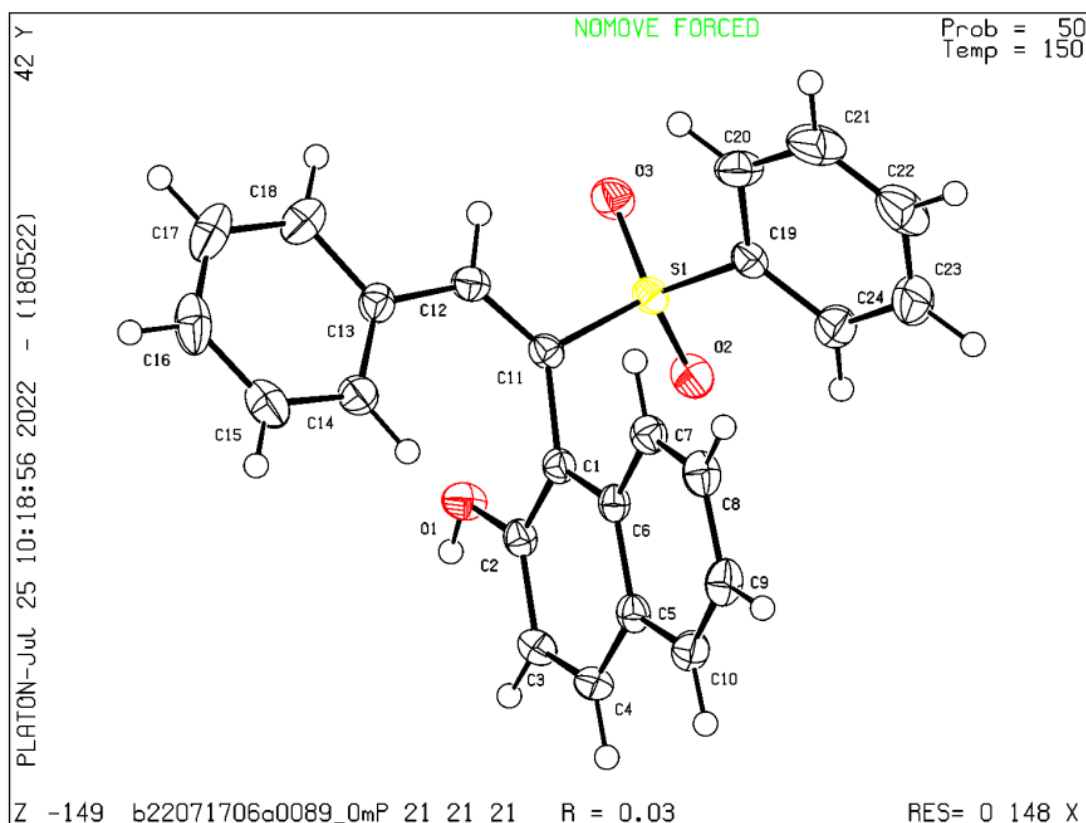

The crystal of compound **(S)-3ha** was obtained by slow evaporation of petroleum ether and dichloromethane solution at room temperature.

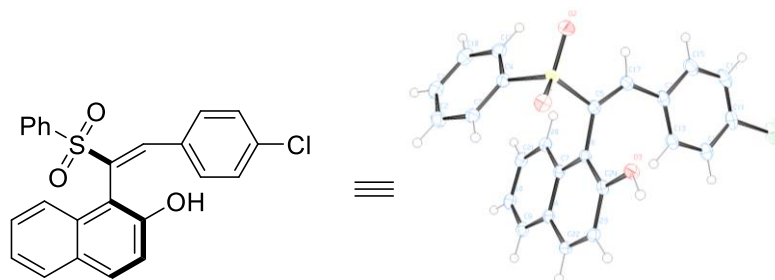

CCDC 2251663

Atomic displacement parameters for non-H atoms are at 30% probability level.

### Crystal data and structure refinement for cxy5077\_0m.

|                     |                                                    |
|---------------------|----------------------------------------------------|
| Identification code | cxy5077_0m                                         |
| Empirical formula   | C <sub>24</sub> H <sub>17</sub> ClO <sub>3</sub> S |
| Formula weight      | 420.89                                             |
| Temperature/K       | 100.0(2)                                           |
| Crystal system      | hexagonal                                          |

|                                             |                                                               |
|---------------------------------------------|---------------------------------------------------------------|
| Space group                                 | P6 <sub>1</sub>                                               |
| a/Å                                         | 21.0471(5)                                                    |
| b/Å                                         | 21.0471(5)                                                    |
| c/Å                                         | 8.1060(3)                                                     |
| α/°                                         | 90                                                            |
| β/°                                         | 90                                                            |
| γ/°                                         | 120                                                           |
| Volume/Å <sup>3</sup>                       | 3109.72(19)                                                   |
| Z                                           | 6                                                             |
| ρ <sub>calc</sub> /cm <sup>3</sup>          | 1.348                                                         |
| μ/mm <sup>-1</sup>                          | 1.817                                                         |
| F(000)                                      | 1308.0                                                        |
| Crystal size/mm <sup>3</sup>                | 0.31 × 0.2 × 0.18                                             |
| Radiation                                   | GaKα (λ = 1.34138)                                            |
| 2θ range for data collection/°              | 7.308 to 114.068                                              |
| Index ranges                                | -26 ≤ h ≤ 26, -26 ≤ k ≤ 26, -10 ≤ l ≤ 10                      |
| Reflections collected                       | 74919                                                         |
| Independent reflections                     | 4242 [R <sub>int</sub> = 0.0456, R <sub>sigma</sub> = 0.0153] |
| Data/restraints/parameters                  | 4242/1/264                                                    |
| Goodness-of-fit on F <sup>2</sup>           | 1.026                                                         |
| Final R indexes [I ≥ 2σ (I)]                | R <sub>1</sub> = 0.0229, wR <sub>2</sub> = 0.0609             |
| Final R indexes [all data]                  | R <sub>1</sub> = 0.0232, wR <sub>2</sub> = 0.0611             |
| Largest diff. peak/hole / e Å <sup>-3</sup> | 0.22/-0.28                                                    |
| Flack parameter                             | 0.005(5)                                                      |

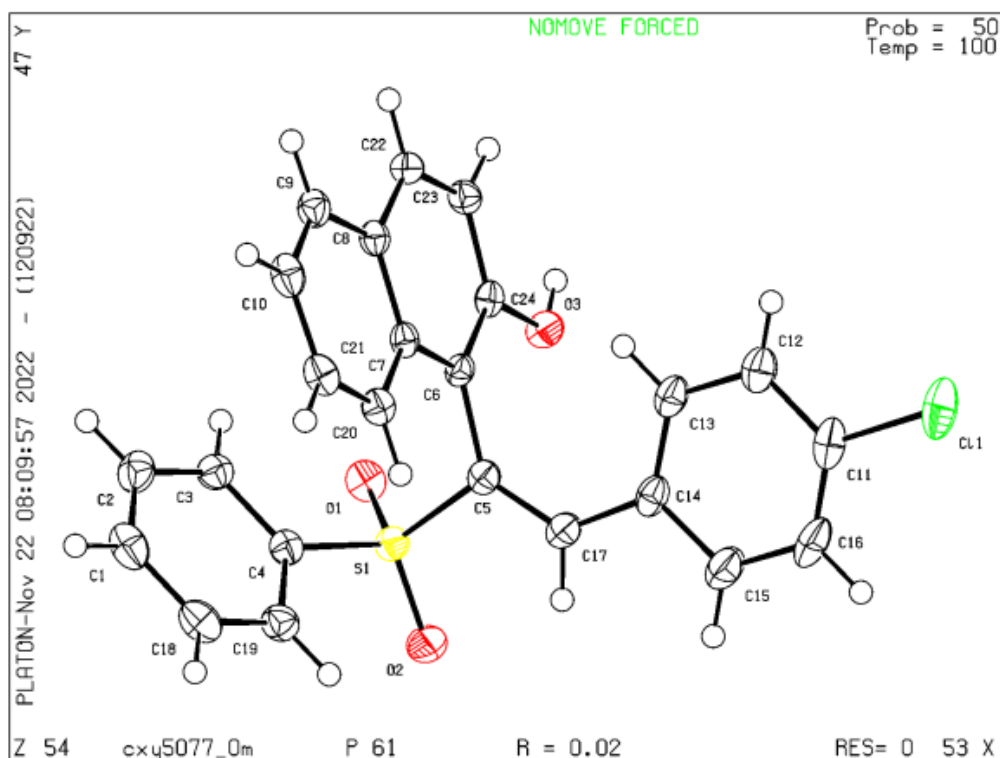

## 8. Copies of NMR Spectra.

$^1\text{H}$  NMR (400 MHz,  $\text{CDCl}_3$ ) of compound **2g'**

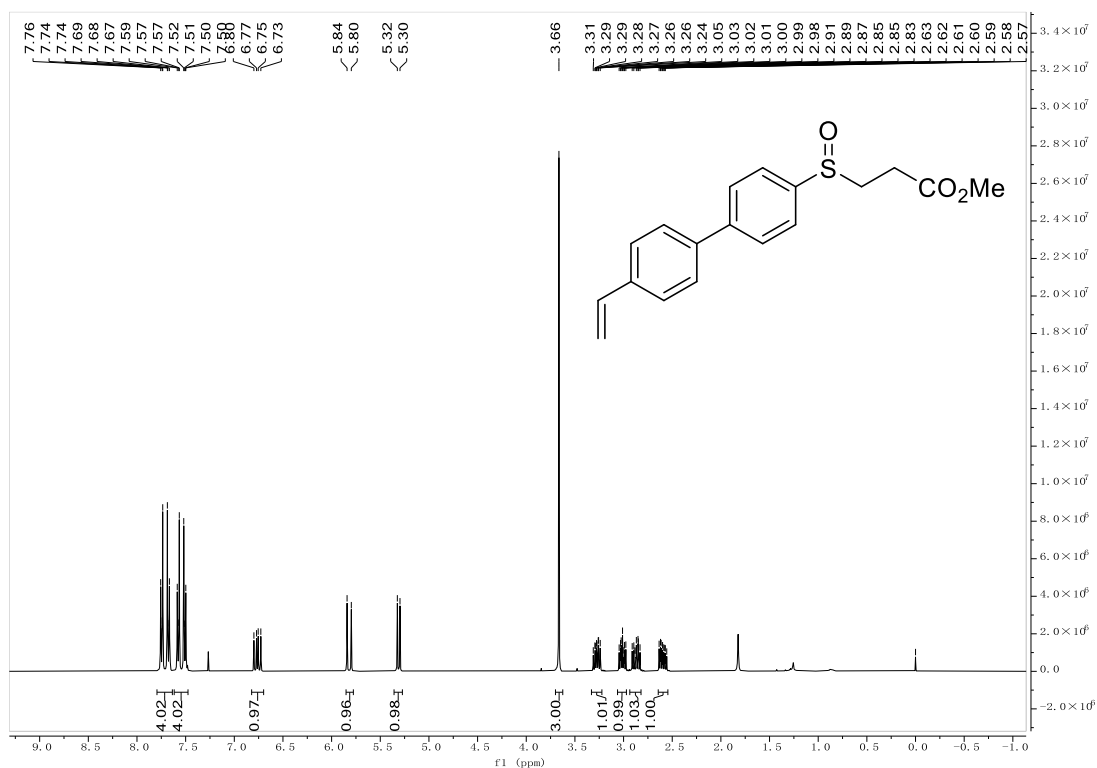

$^{13}\text{C}$  NMR (101 MHz,  $\text{CDCl}_3$ ) of compound **2g'**

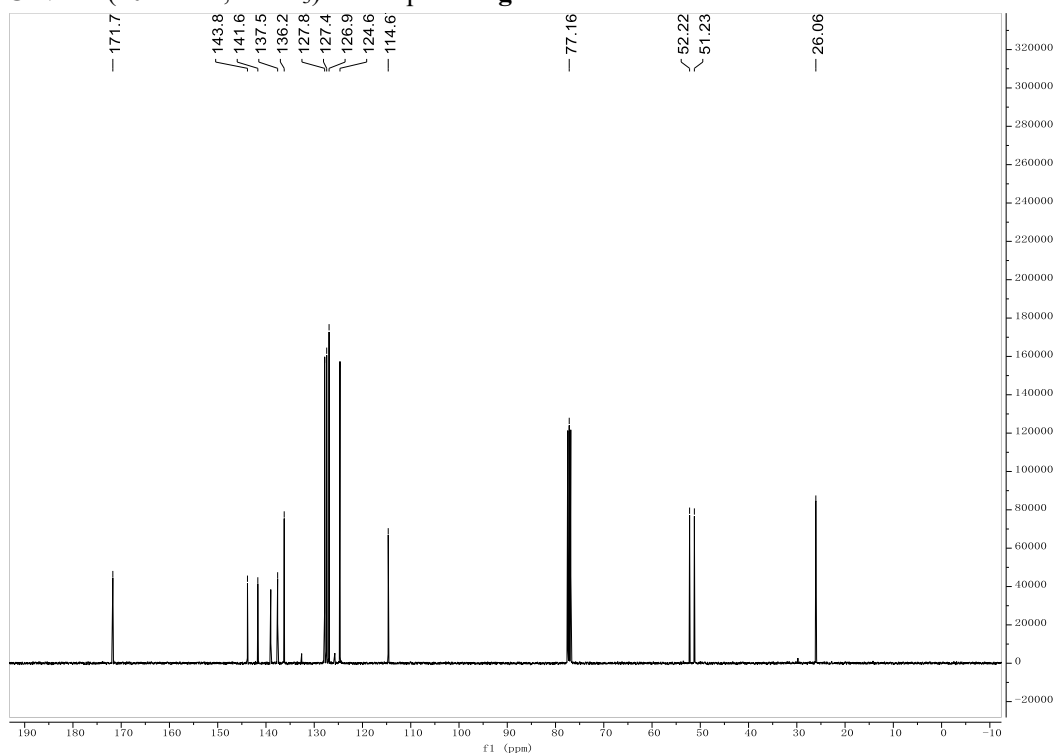

<sup>1</sup>H NMR (400 MHz, CDCl<sub>3</sub>) of compound **3aa**

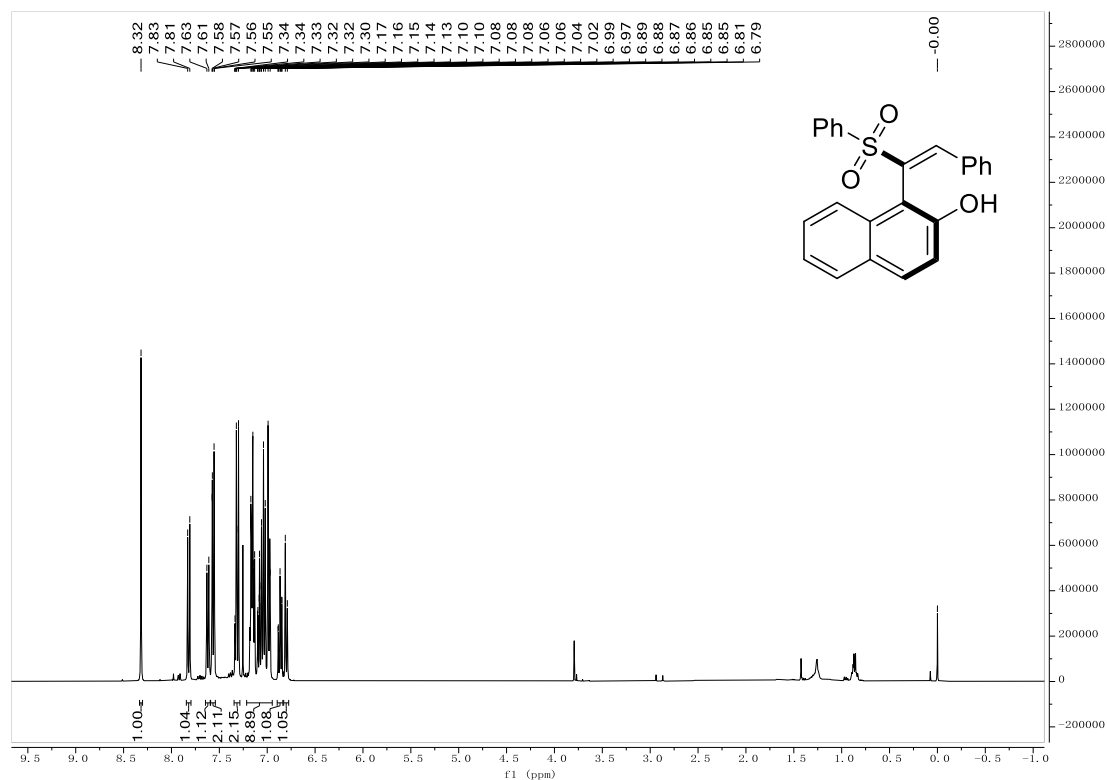

<sup>13</sup>C NMR (101 MHz, CDCl<sub>3</sub>) of compound **3aa**

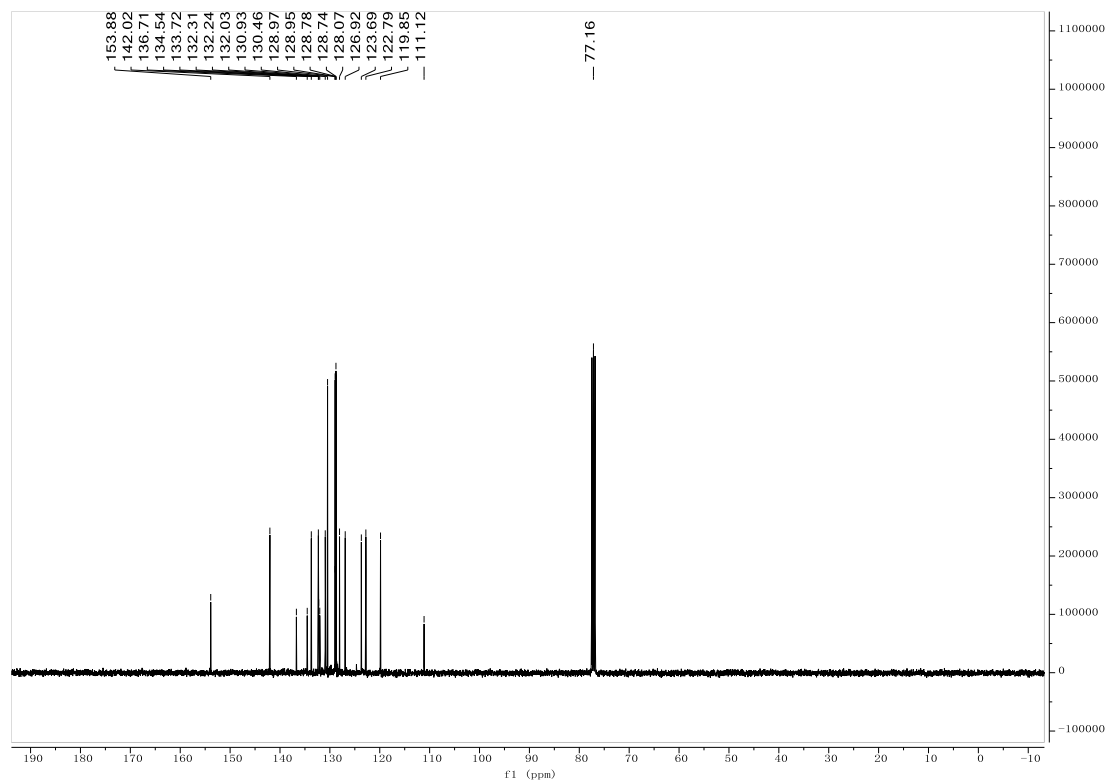

**<sup>1</sup>H NMR (400 MHz, CDCl<sub>3</sub>) of compound 3ab**

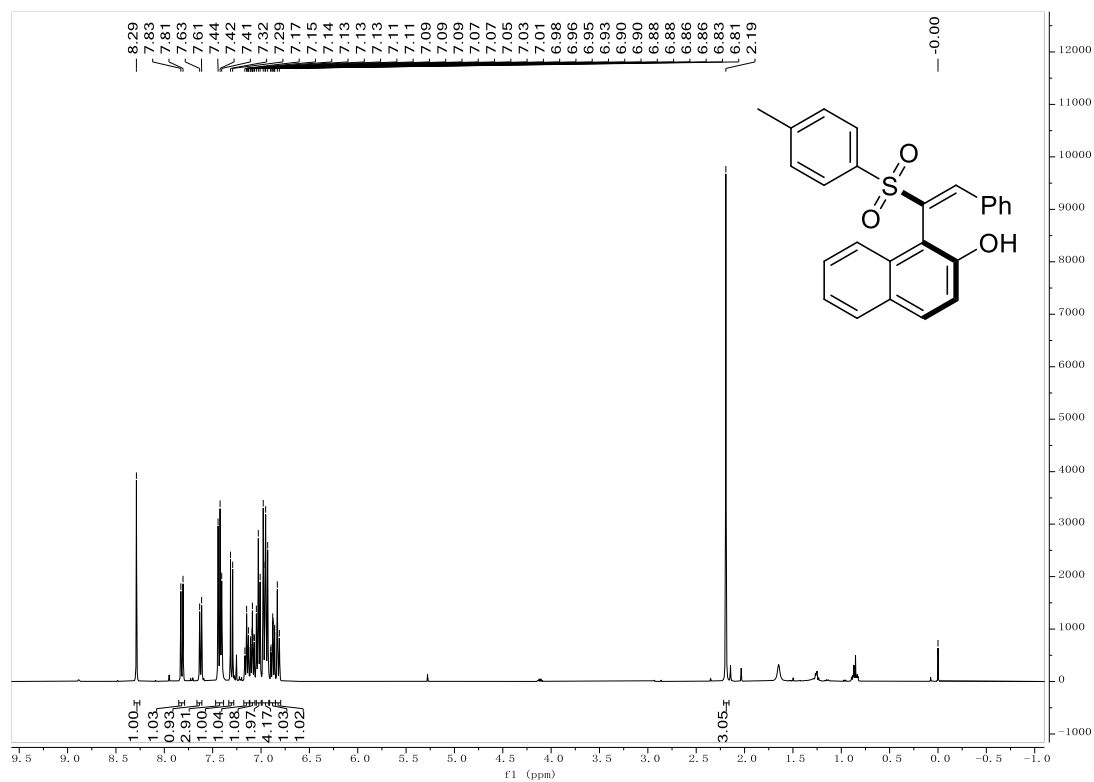

**<sup>13</sup>C NMR (101 MHz, CDCl<sub>3</sub>) of compound 3ab**

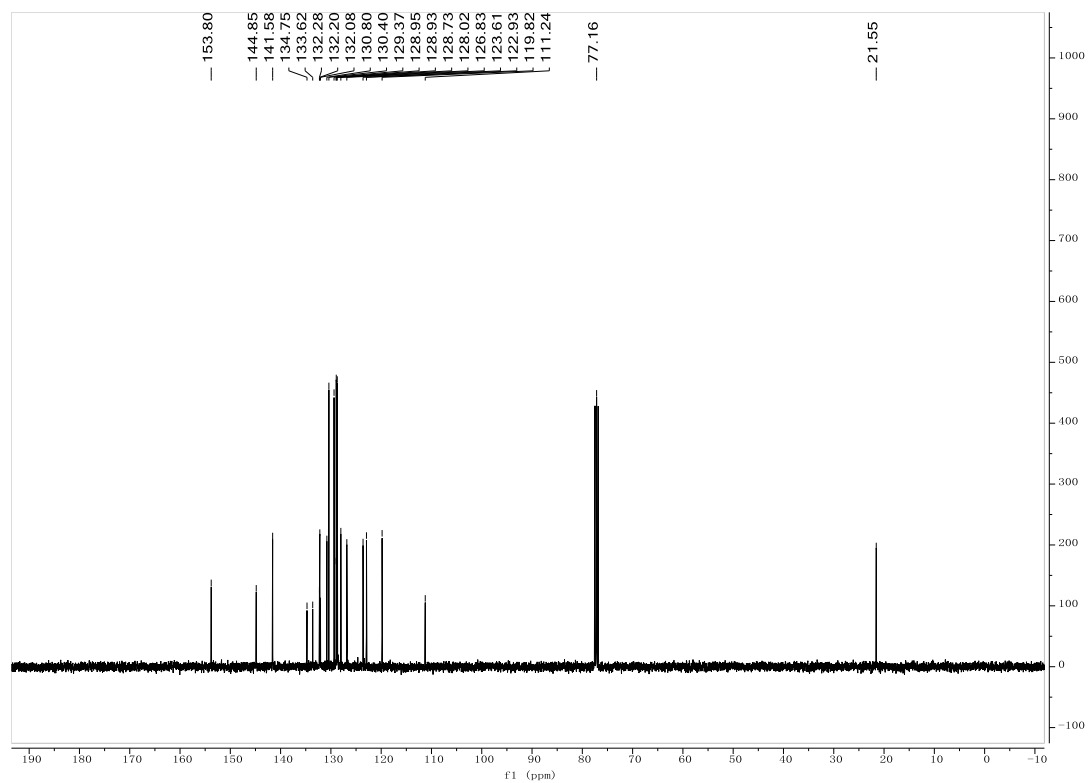

<sup>1</sup>H NMR (400 MHz, CDCl<sub>3</sub>) of compound **3ac**

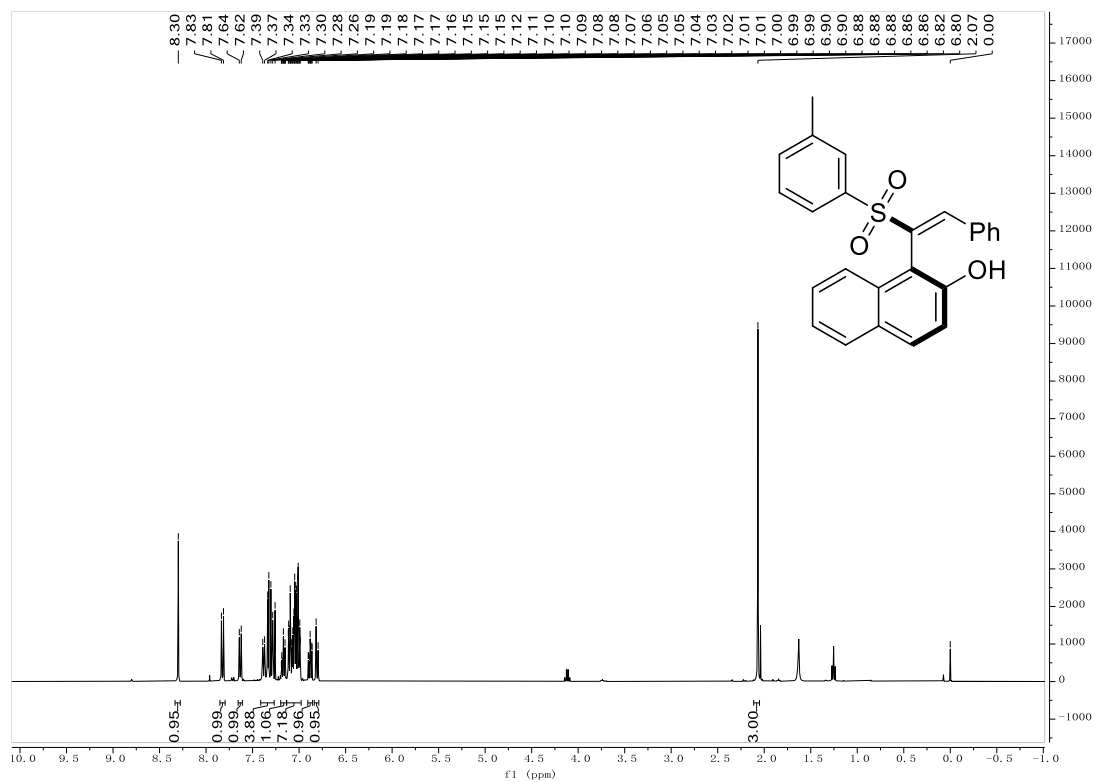

<sup>13</sup>C NMR (101 MHz, CDCl<sub>3</sub>) of compound **3ac**

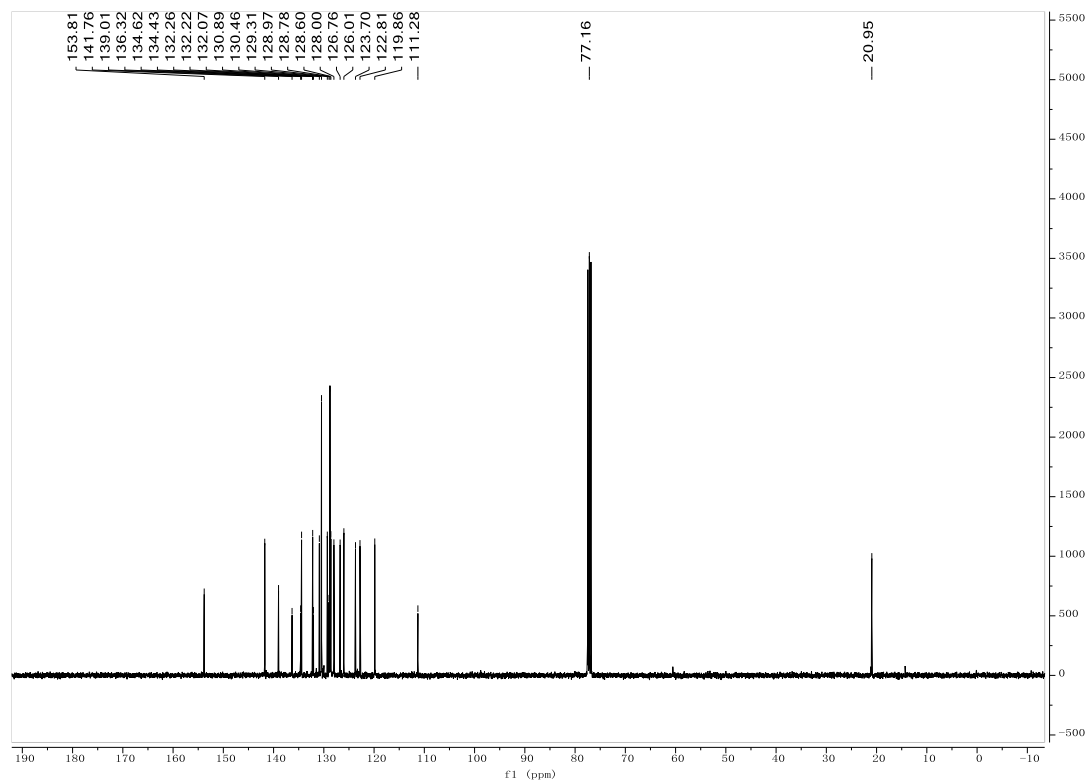

**<sup>1</sup>H NMR (400 MHz, CDCl<sub>3</sub>) of compound 3ad**

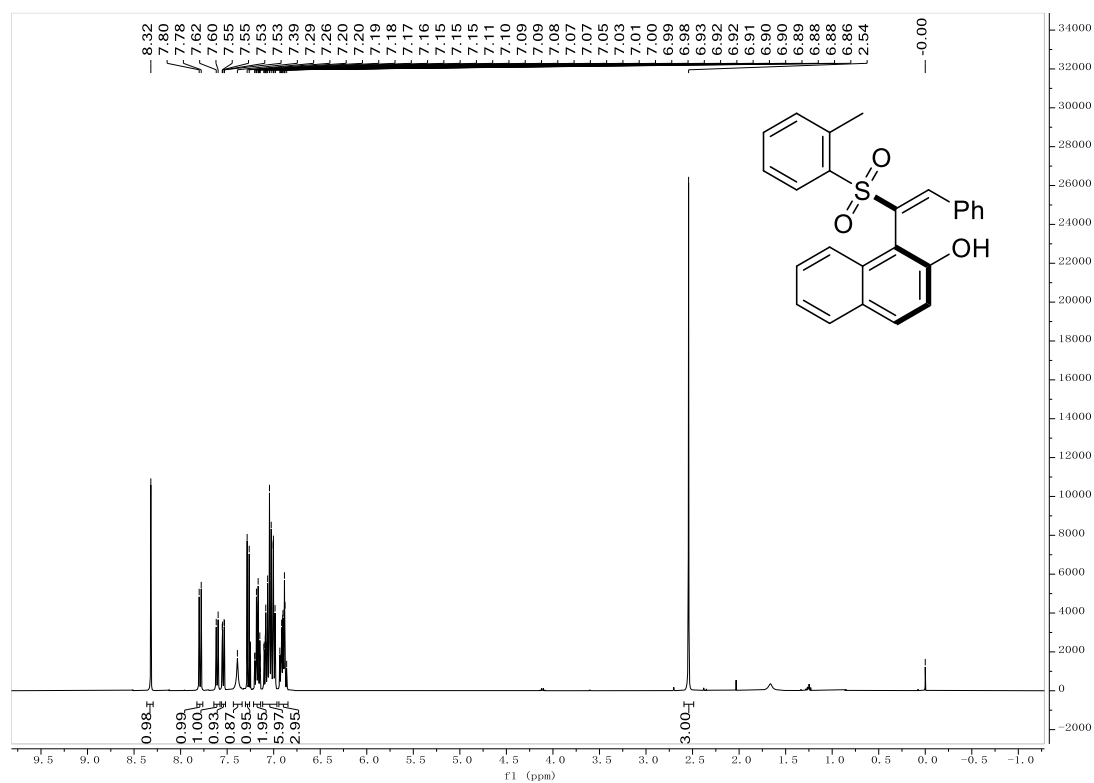

**<sup>13</sup>C NMR (101 MHz, CDCl<sub>3</sub>) of compound 3ad**

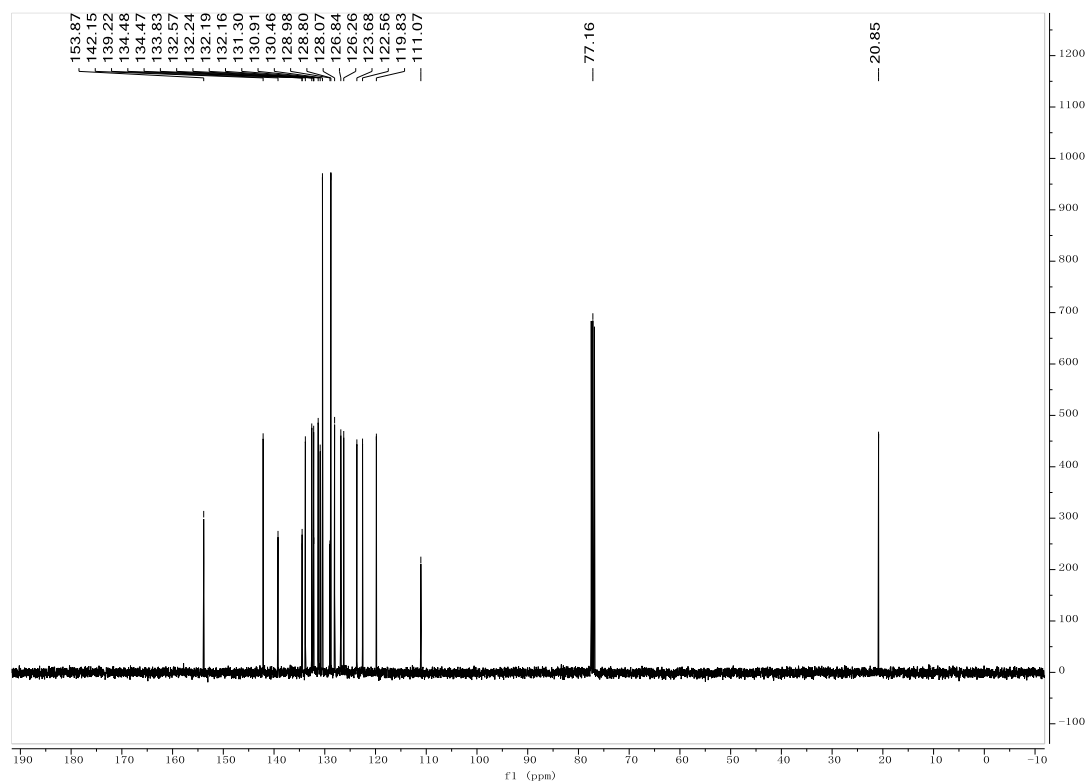

<sup>1</sup>H NMR (400 MHz, CDCl<sub>3</sub>) of compound 3ae

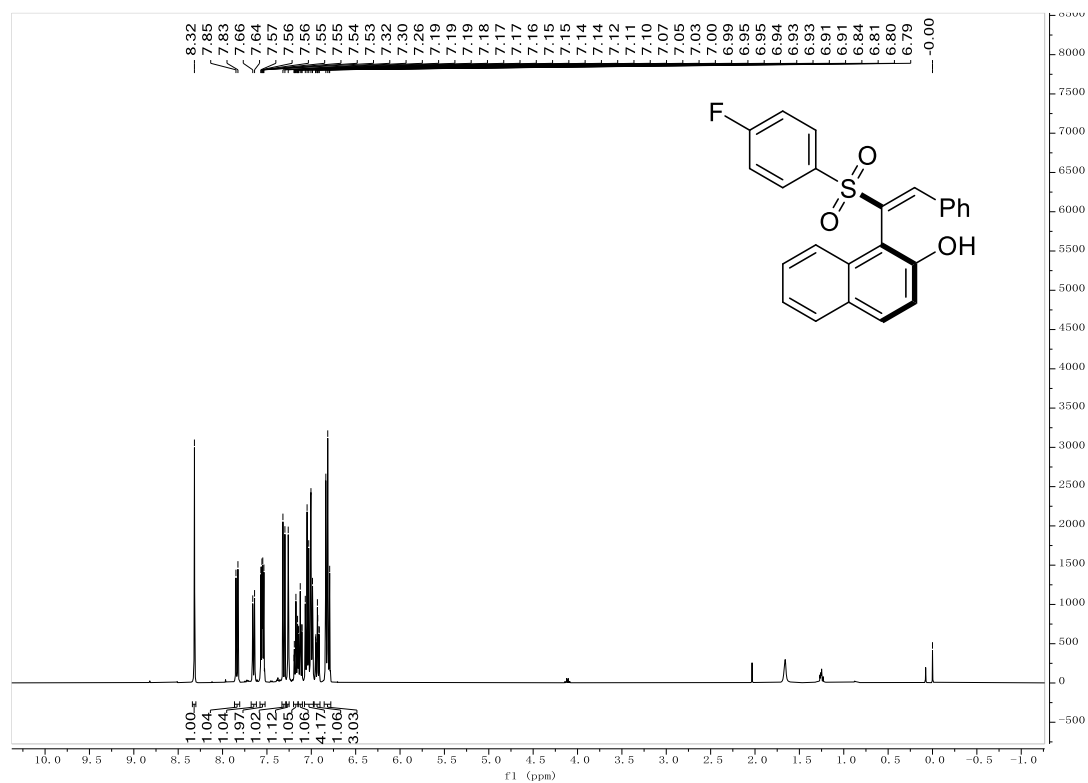

<sup>13</sup>C NMR (101 MHz, CDCl<sub>3</sub>) of compound 3ae

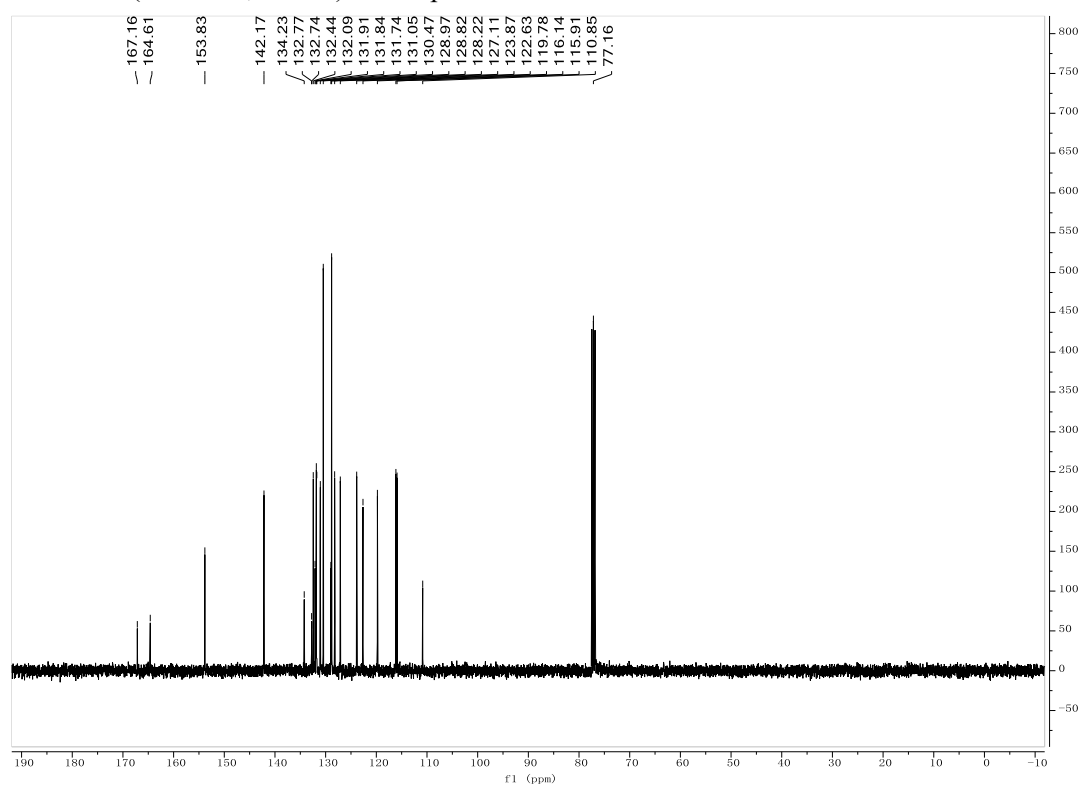



**$^{19}\text{F}$  NMR (376 MHz,  $\text{CDCl}_3$ ) of compound **3ae****

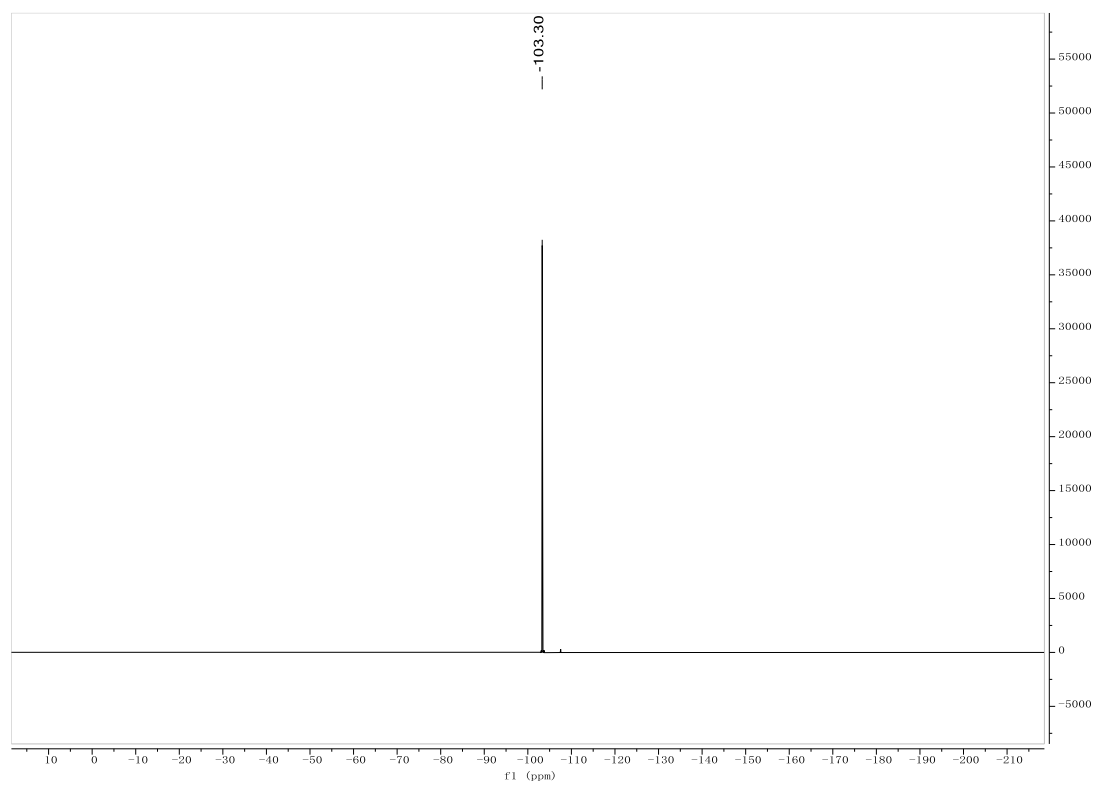

**<sup>1</sup>H NMR (400 MHz, CDCl<sub>3</sub>) of compound 3af**

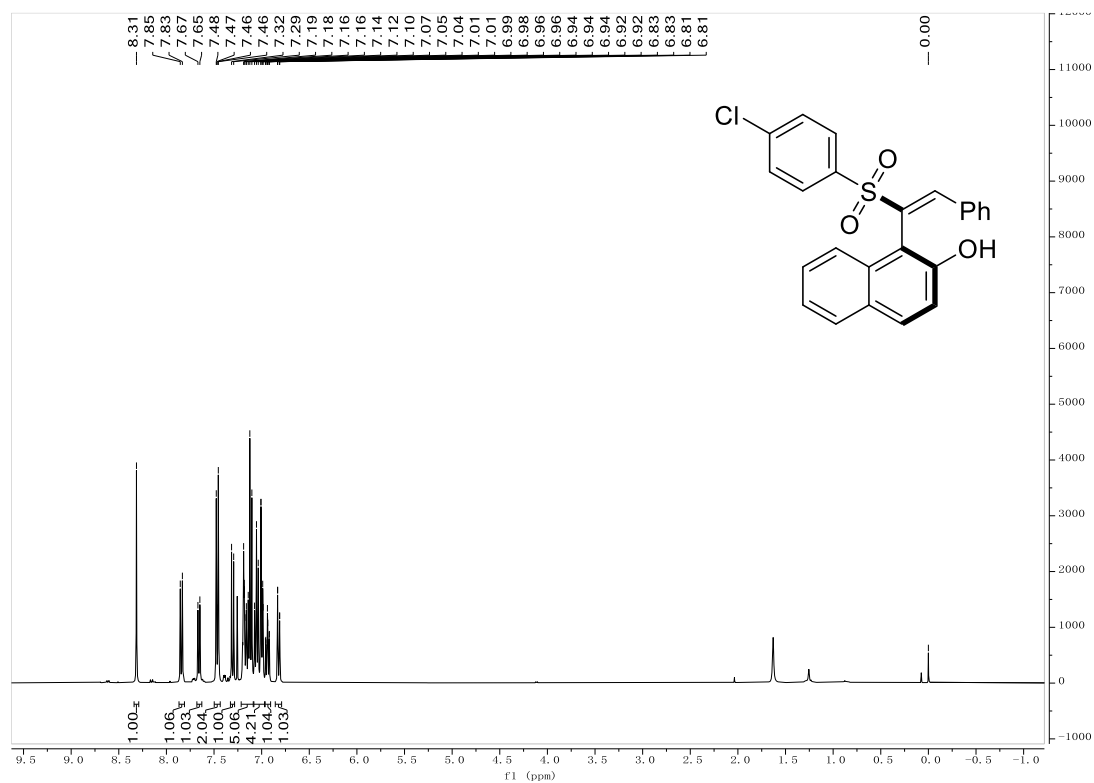

**<sup>13</sup>C NMR (101 MHz, CDCl<sub>3</sub>) of compound 3af**

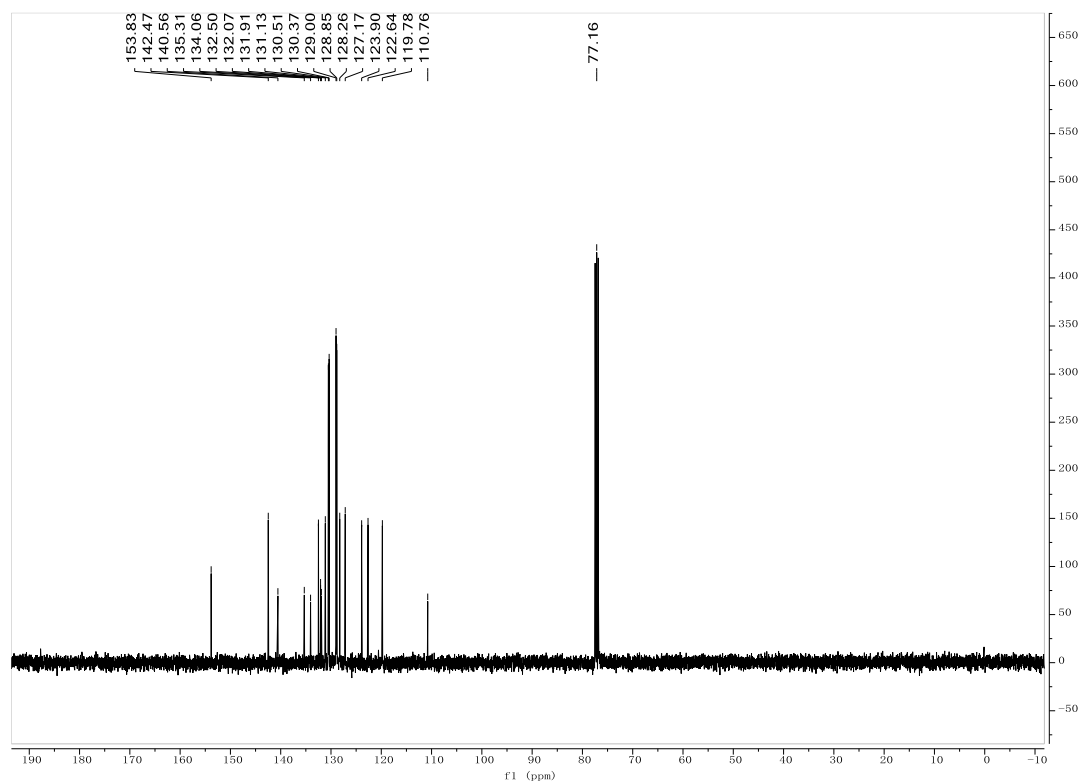

<sup>1</sup>H NMR (400 MHz, CDCl<sub>3</sub>) of compound **3ag**

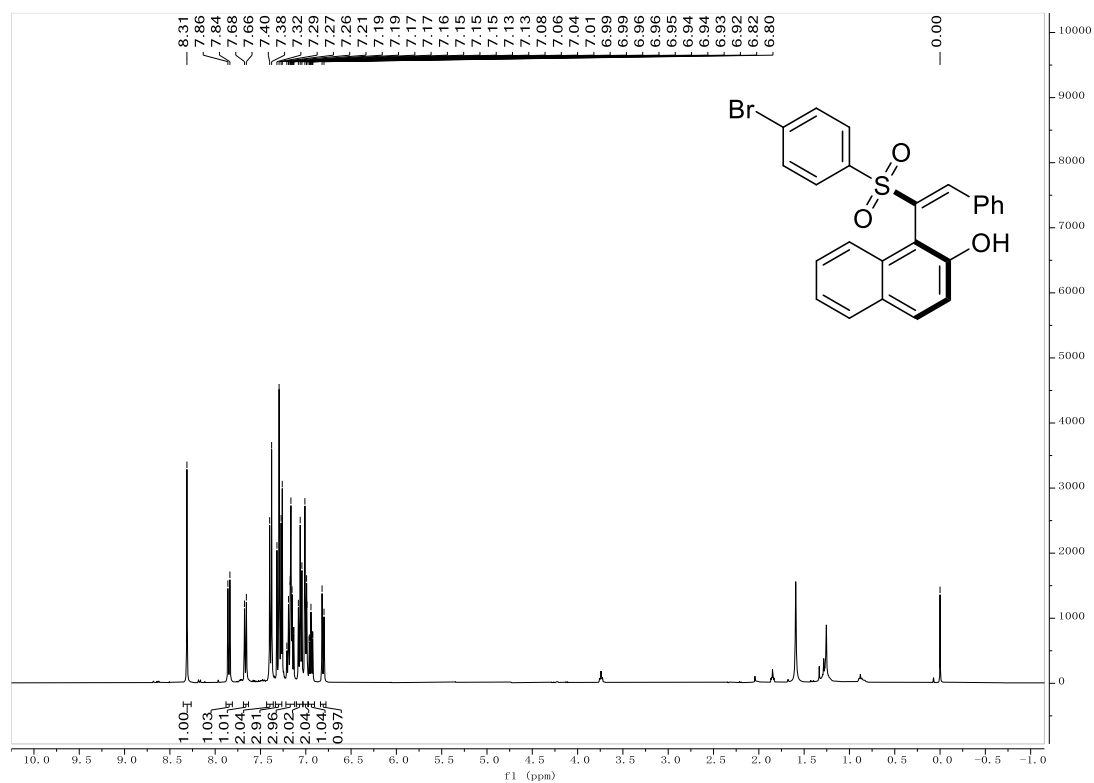

<sup>13</sup>C NMR (101 MHz, CDCl<sub>3</sub>) of compound **3ag**

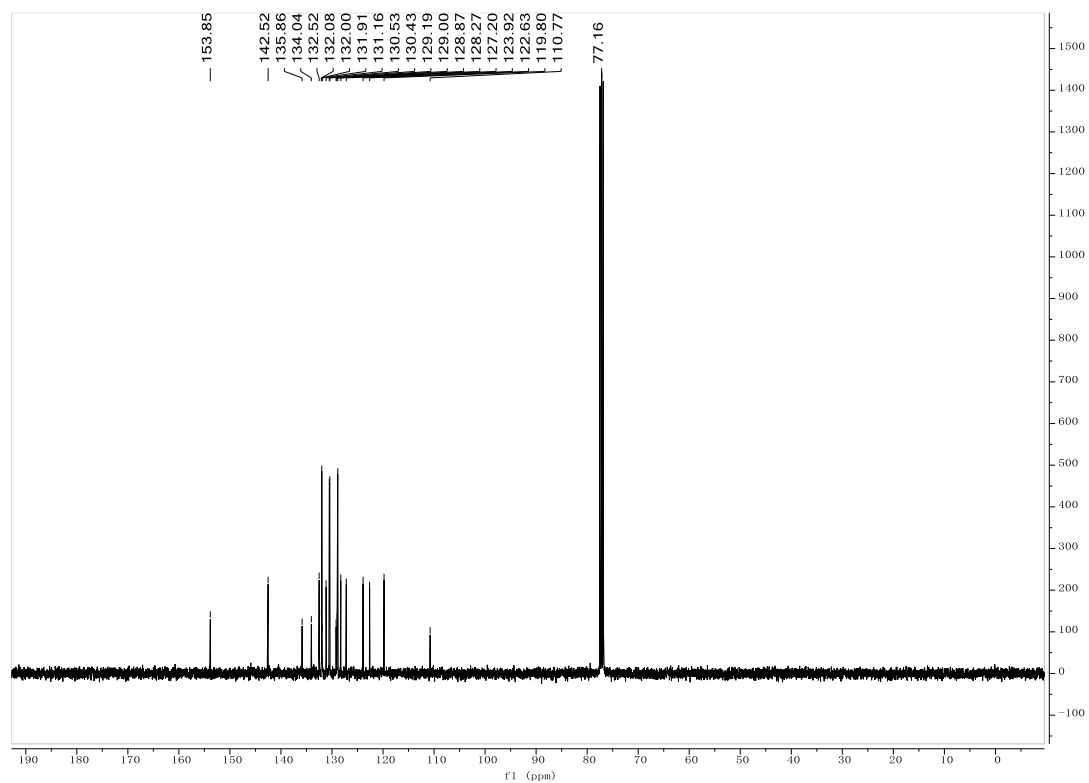

**<sup>1</sup>H NMR (400 MHz, CDCl<sub>3</sub>) of compound 3ah**

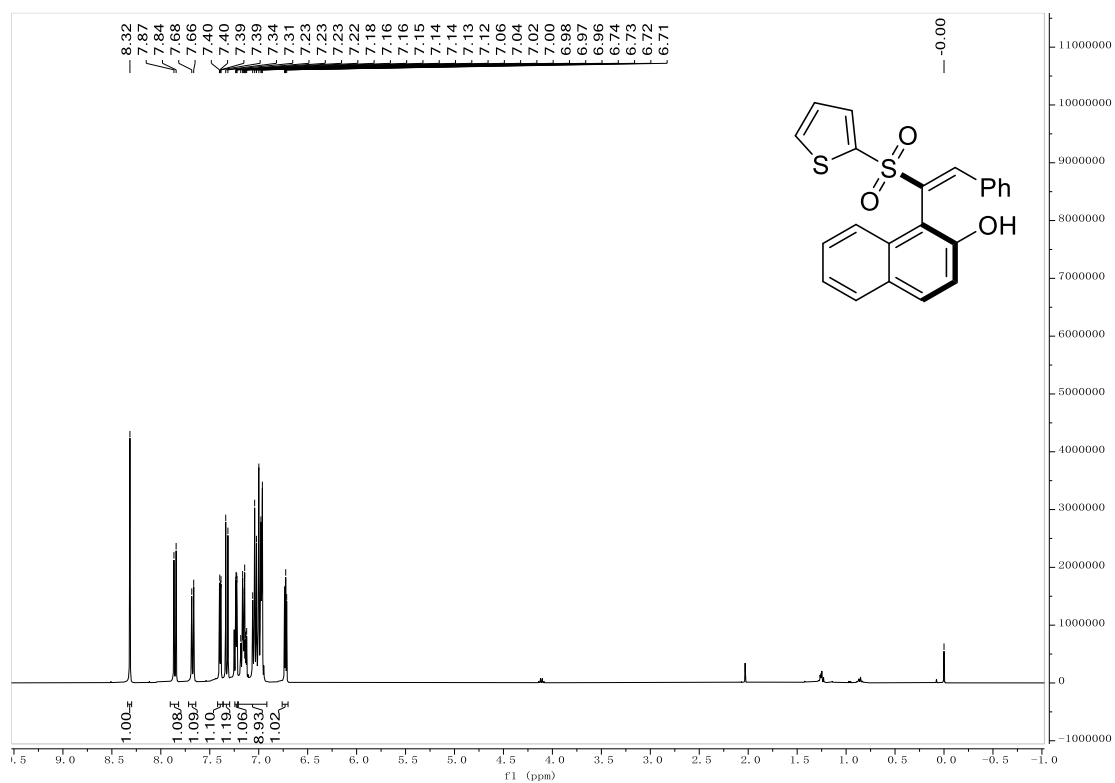

**<sup>13</sup>C NMR (101 MHz, CDCl<sub>3</sub>) of compound 3ah**

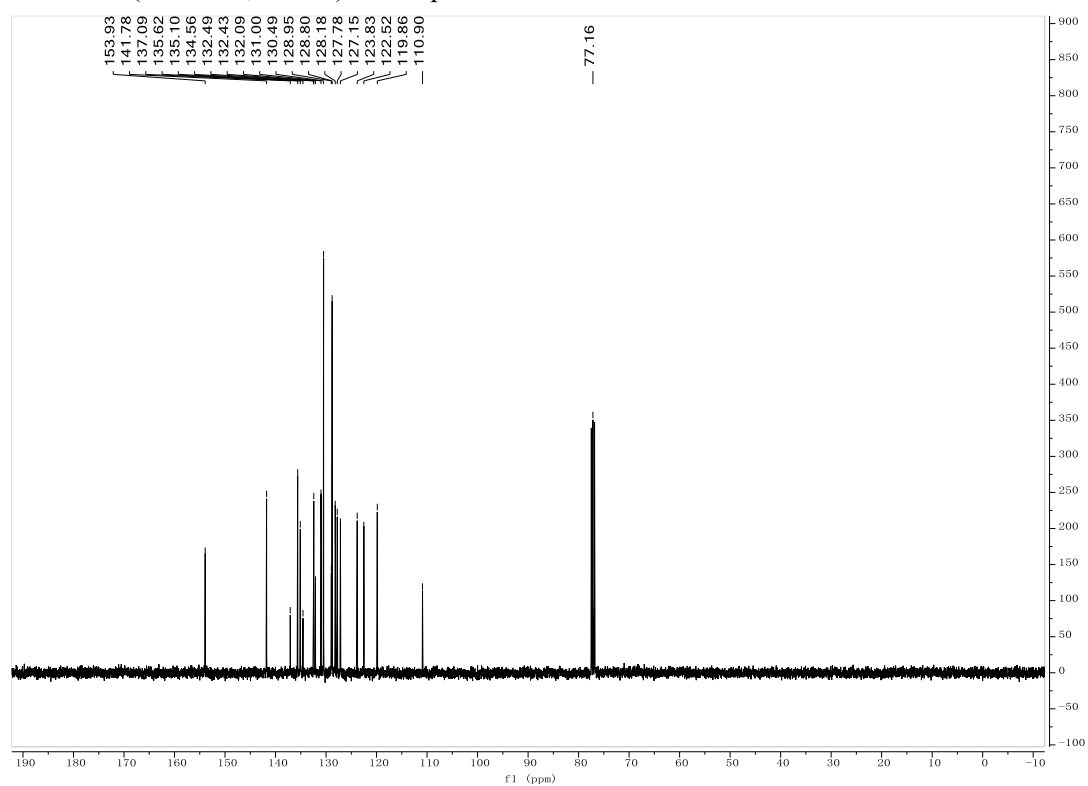

**<sup>1</sup>H NMR (400 MHz, CDCl<sub>3</sub>) of compound 3ag'**

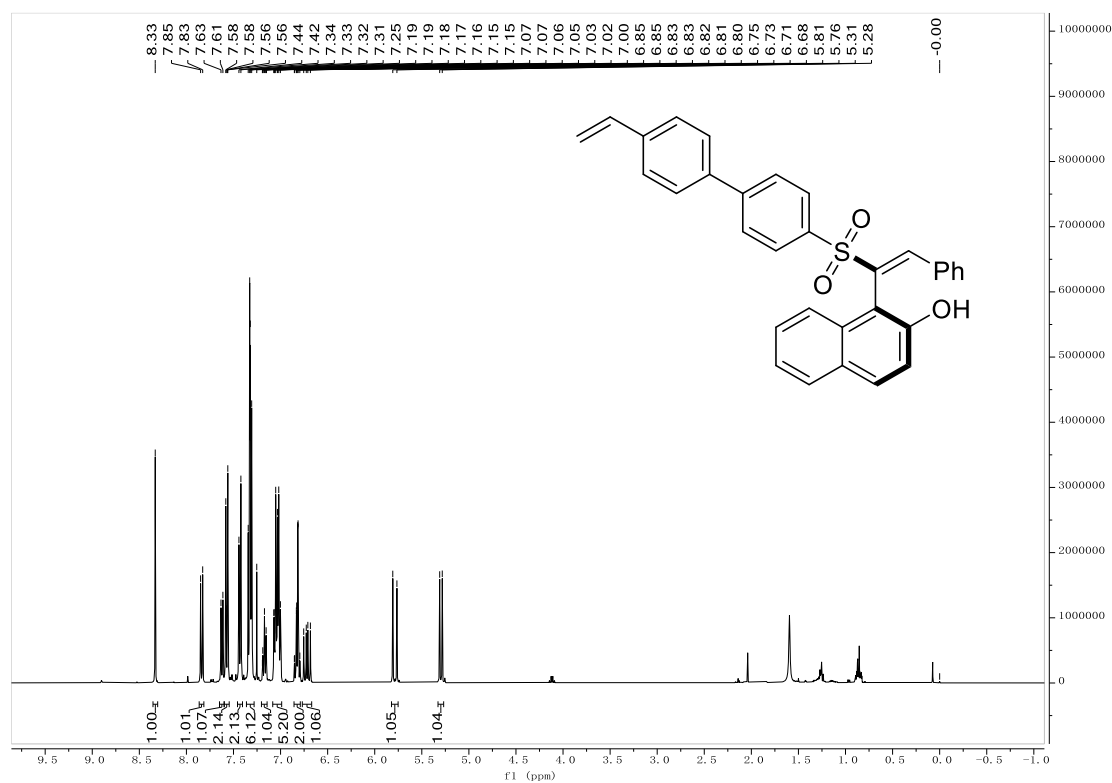

**<sup>13</sup>C NMR (101 MHz, CDCl<sub>3</sub>) of compound 3ag'**

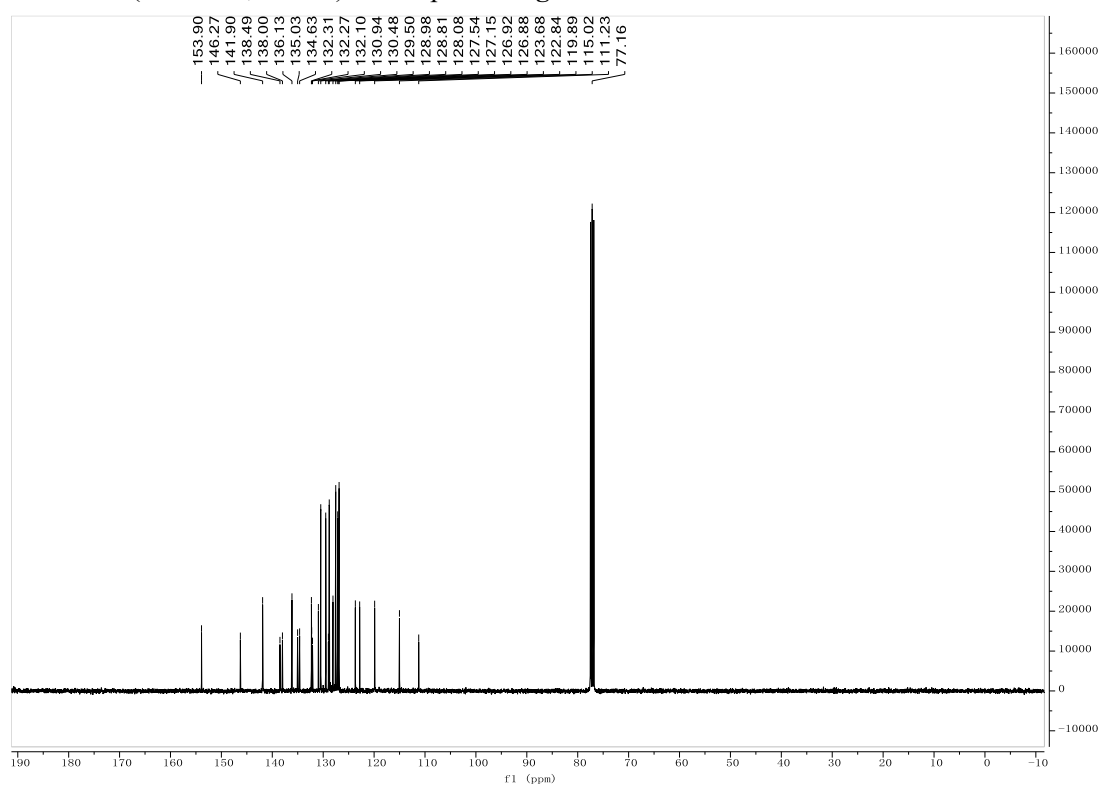

**<sup>1</sup>H NMR (400 MHz, CDCl<sub>3</sub>) of compound 3ba**

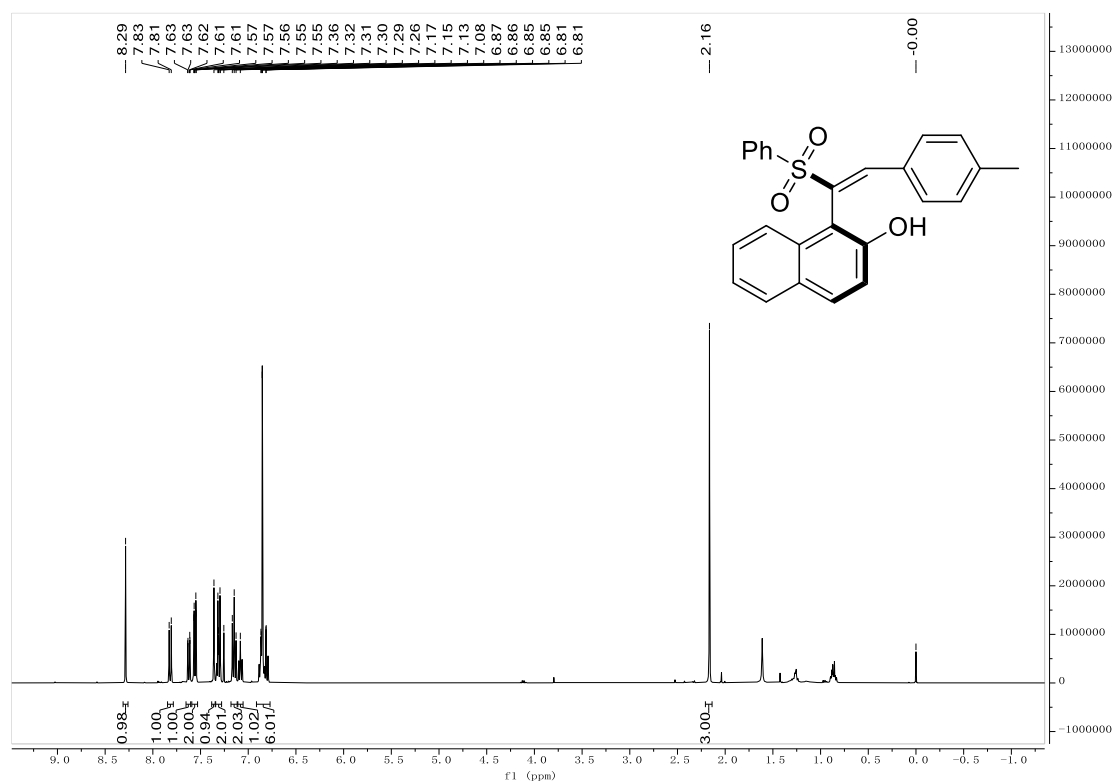

**<sup>13</sup>C NMR (101 MHz, CDCl<sub>3</sub>) of compound 3ba**

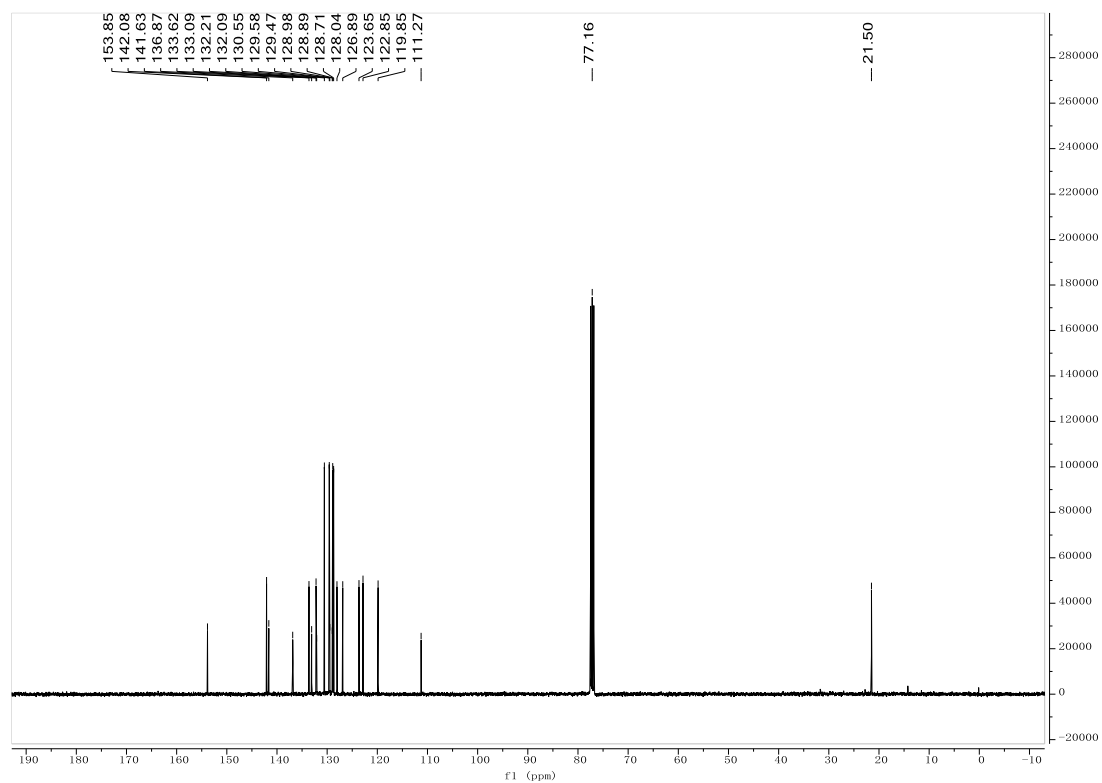

**<sup>1</sup>H NMR (400 MHz, CDCl<sub>3</sub>) of compound 3ca**

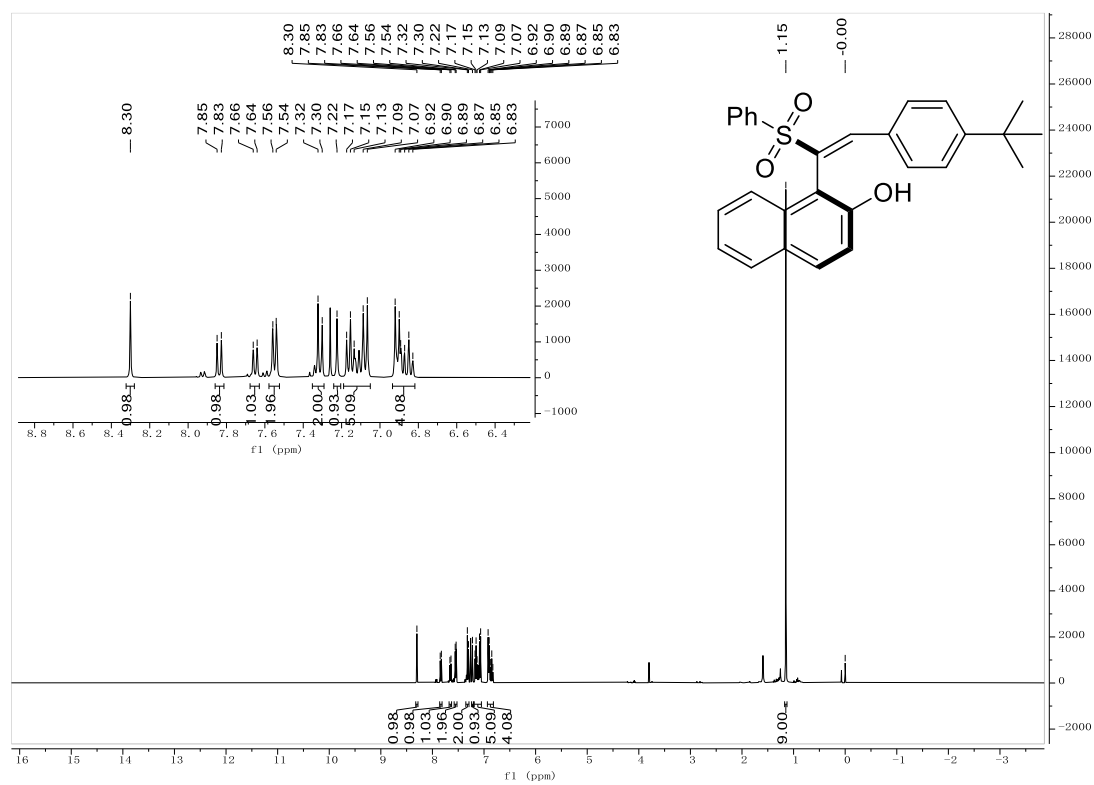

**<sup>13</sup>C NMR (101 MHz, CDCl<sub>3</sub>) of compound 3ca**

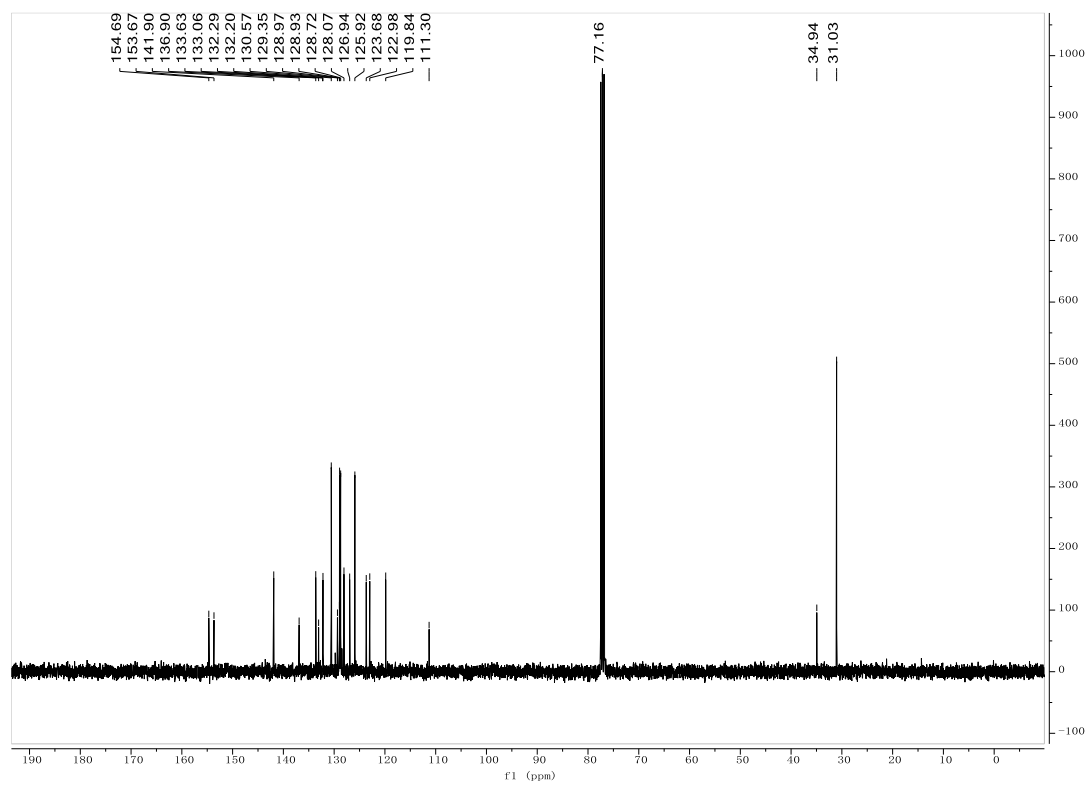

**<sup>1</sup>H NMR (400 MHz, CDCl<sub>3</sub>) of compound 3da**

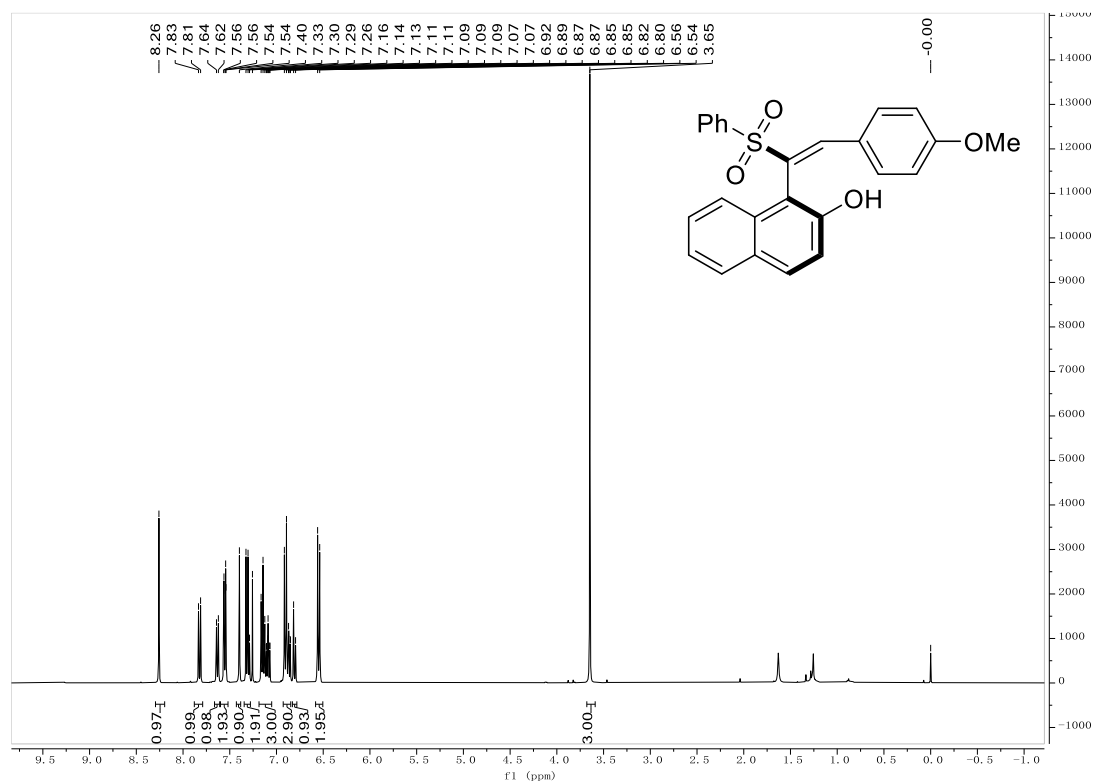

**<sup>13</sup>C NMR (101 MHz, CDCl<sub>3</sub>) of compound 3da**

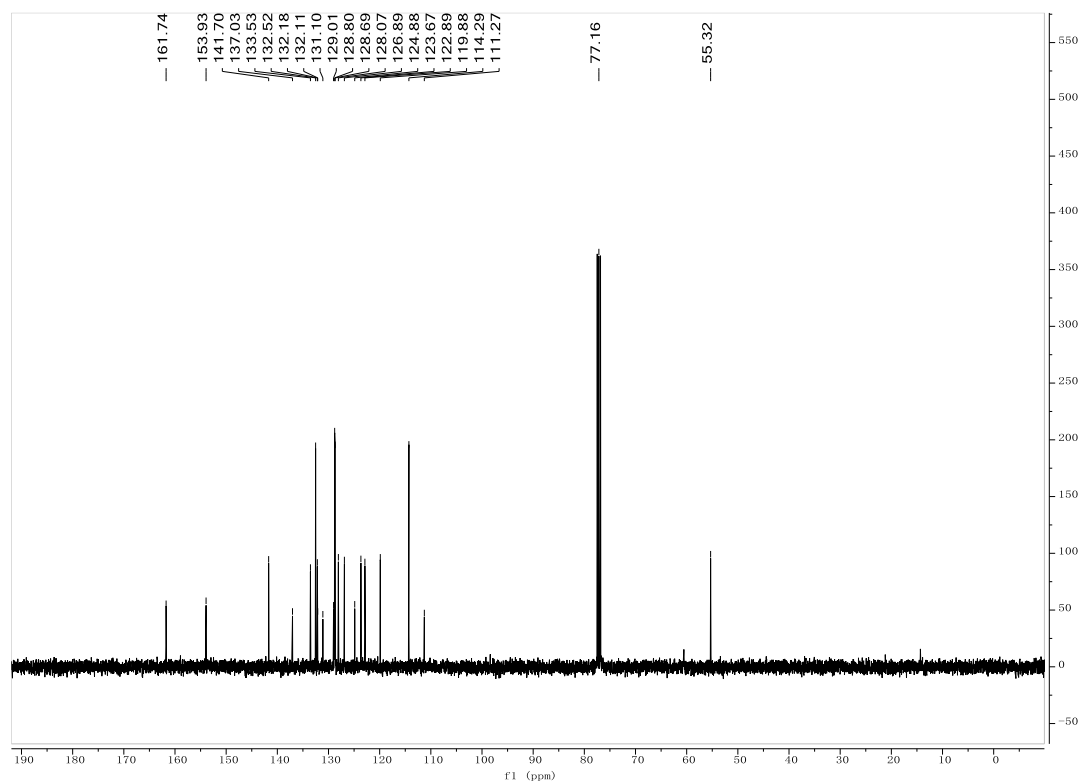



<sup>1</sup>H NMR (400 MHz, CDCl<sub>3</sub>) of compound **3ea**

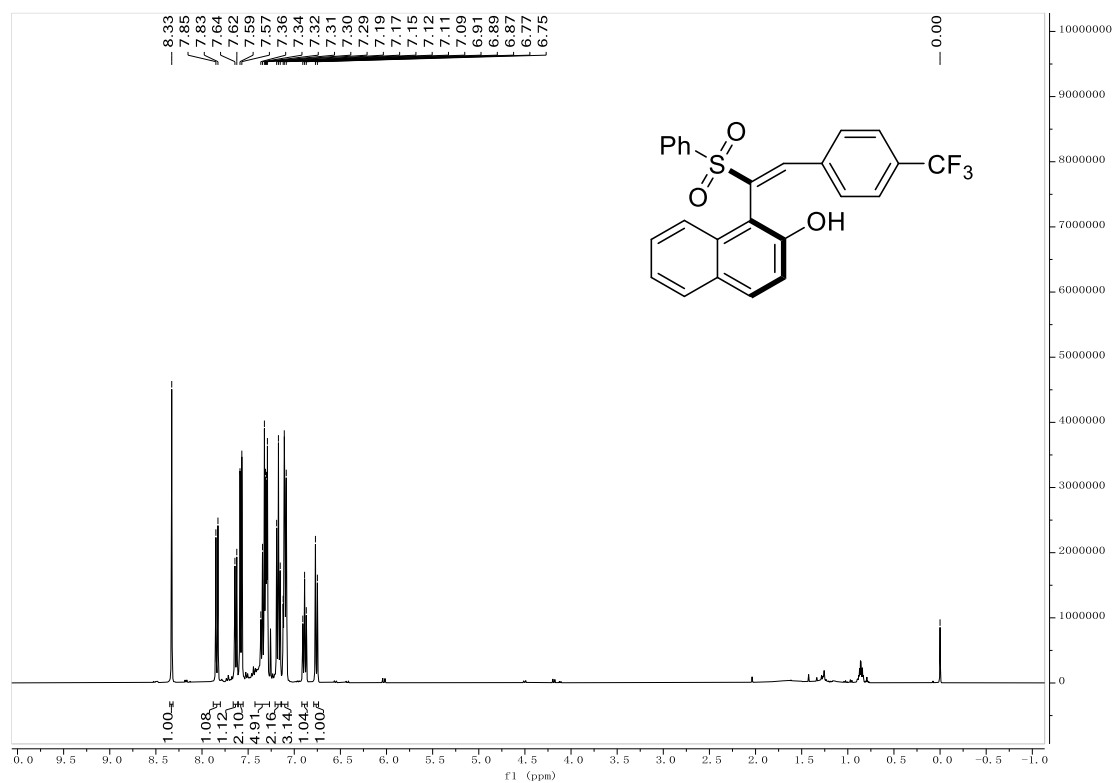

<sup>13</sup>C NMR (101 MHz, CDCl<sub>3</sub>) of compound **3ea**

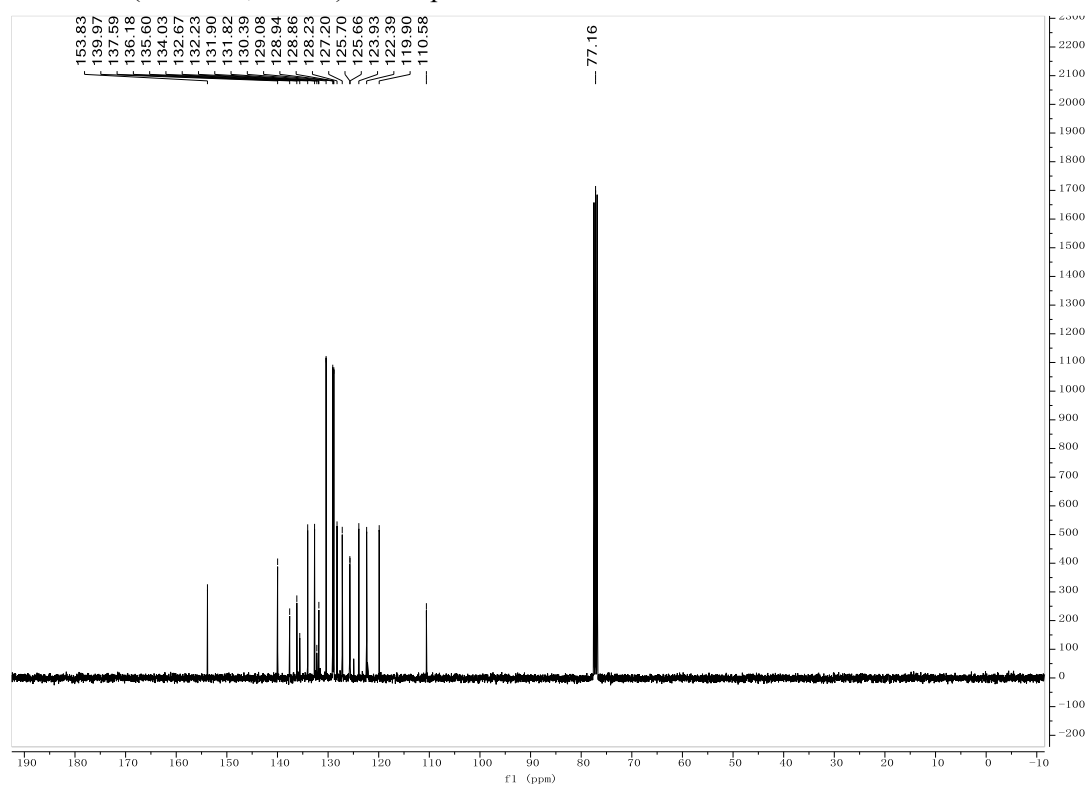

**$^{19}\text{F}$  NMR (376 MHz,  $\text{CDCl}_3$ ) of compound **3ea****

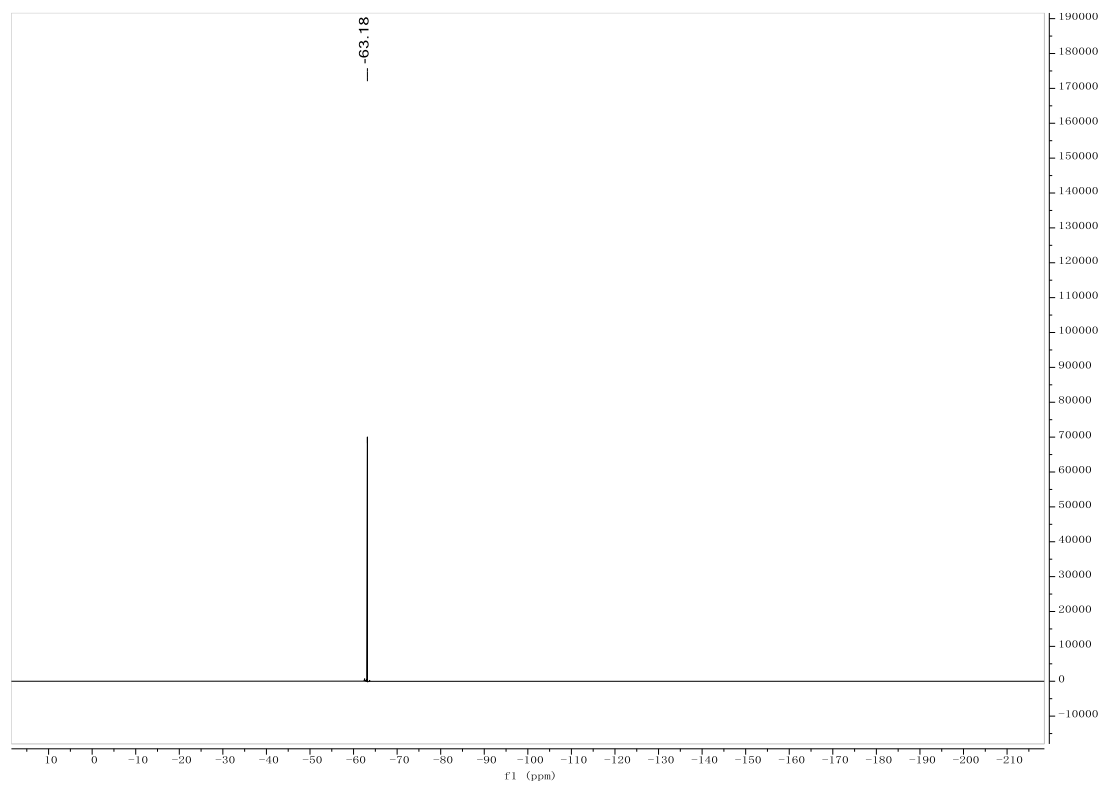

<sup>1</sup>H NMR (400 MHz, CDCl<sub>3</sub>) of compound **3fa**

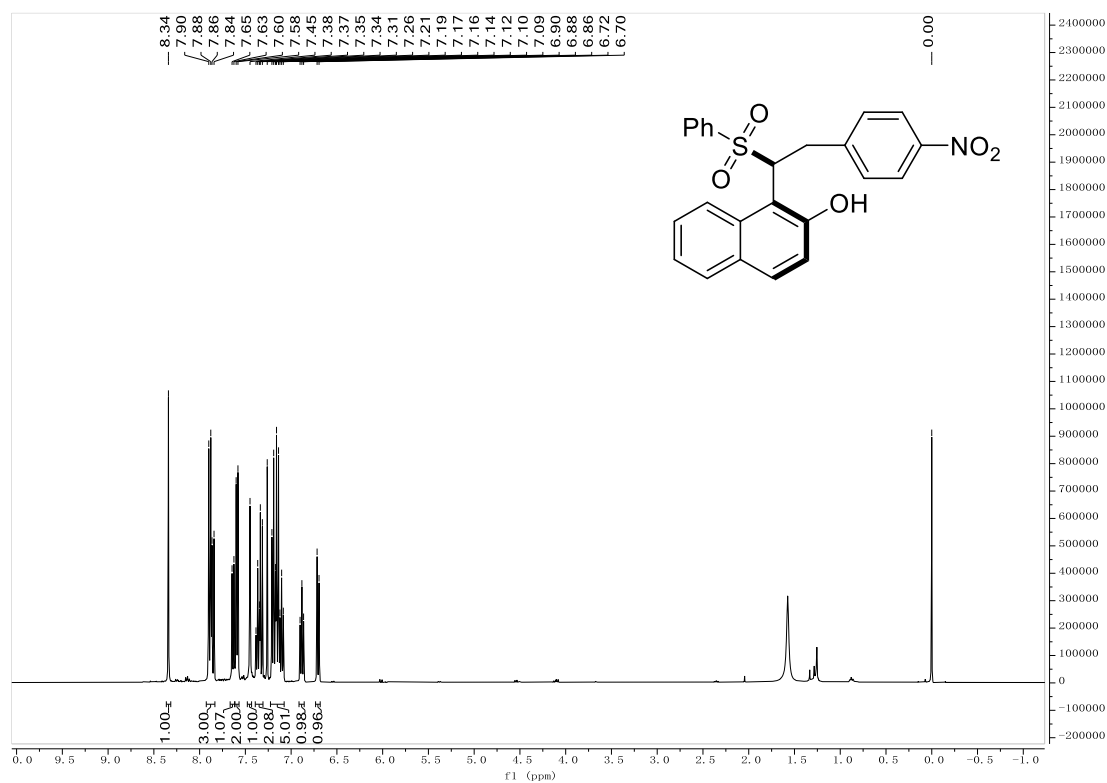

<sup>13</sup>C NMR (101 MHz, CDCl<sub>3</sub>) of compound **3fa**

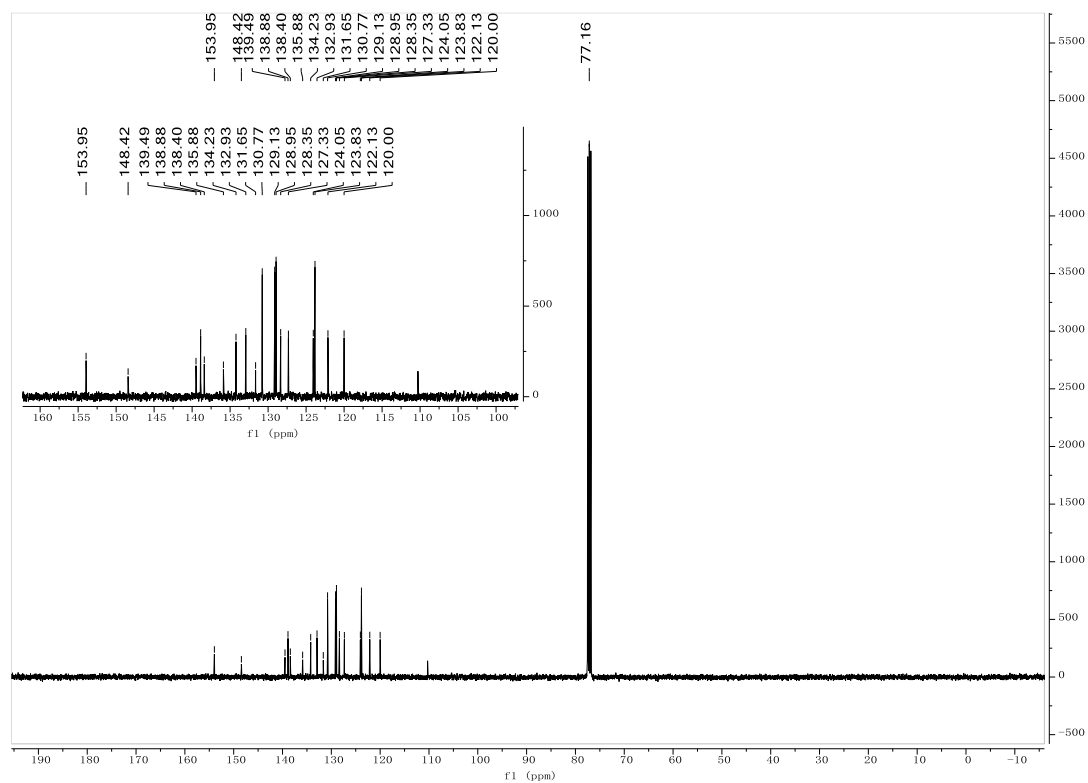

<sup>1</sup>H NMR (400 MHz, CDCl<sub>3</sub>) of compound **3ga**

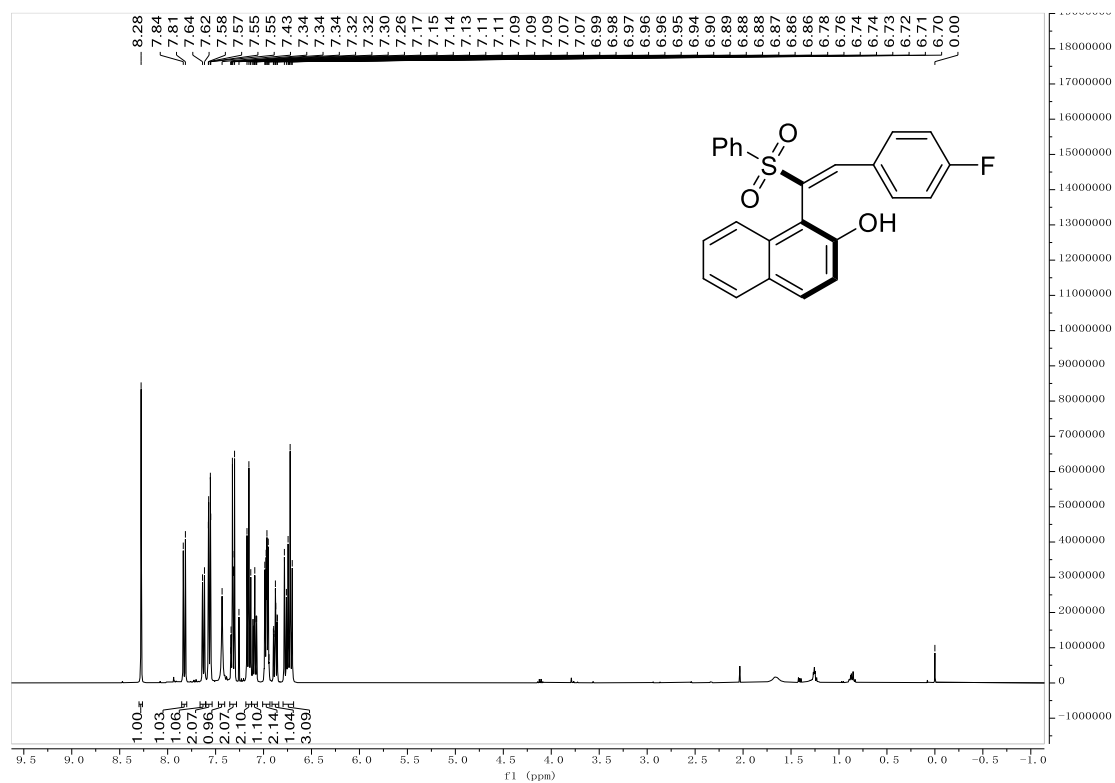

<sup>13</sup>C NMR (101 MHz, CDCl<sub>3</sub>) of compound **3ga**

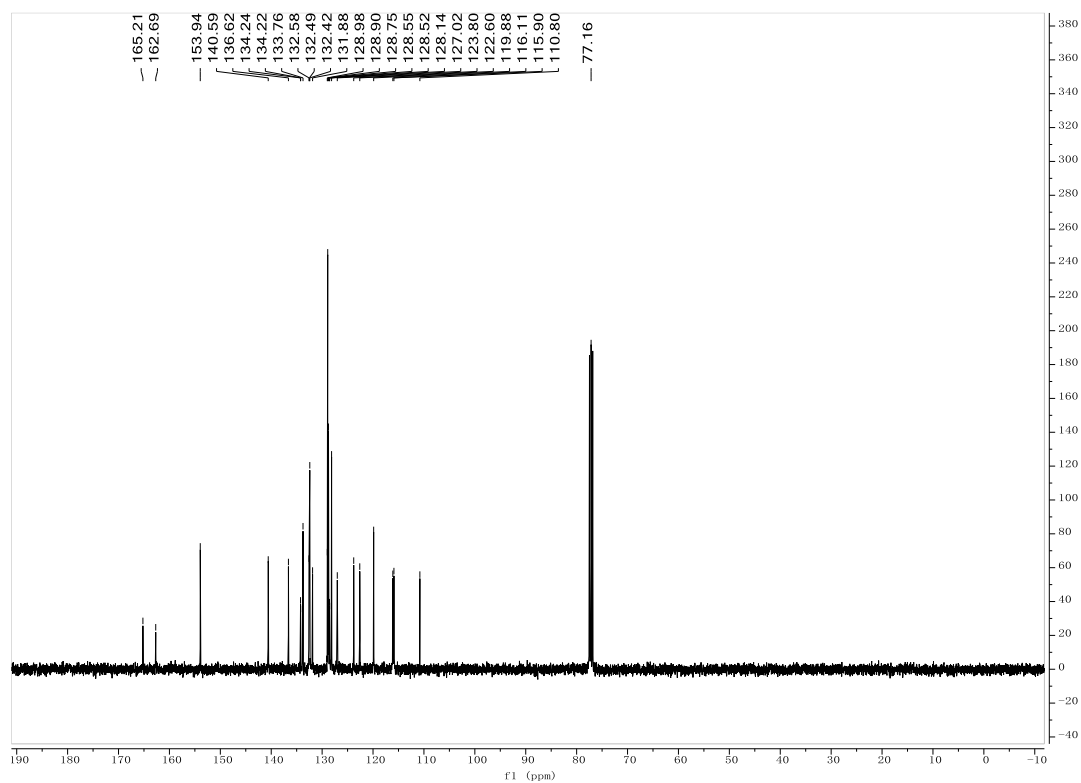

**$^{19}\text{F}$  NMR (376 MHz,  $\text{CDCl}_3$ ) of compound **3ga****

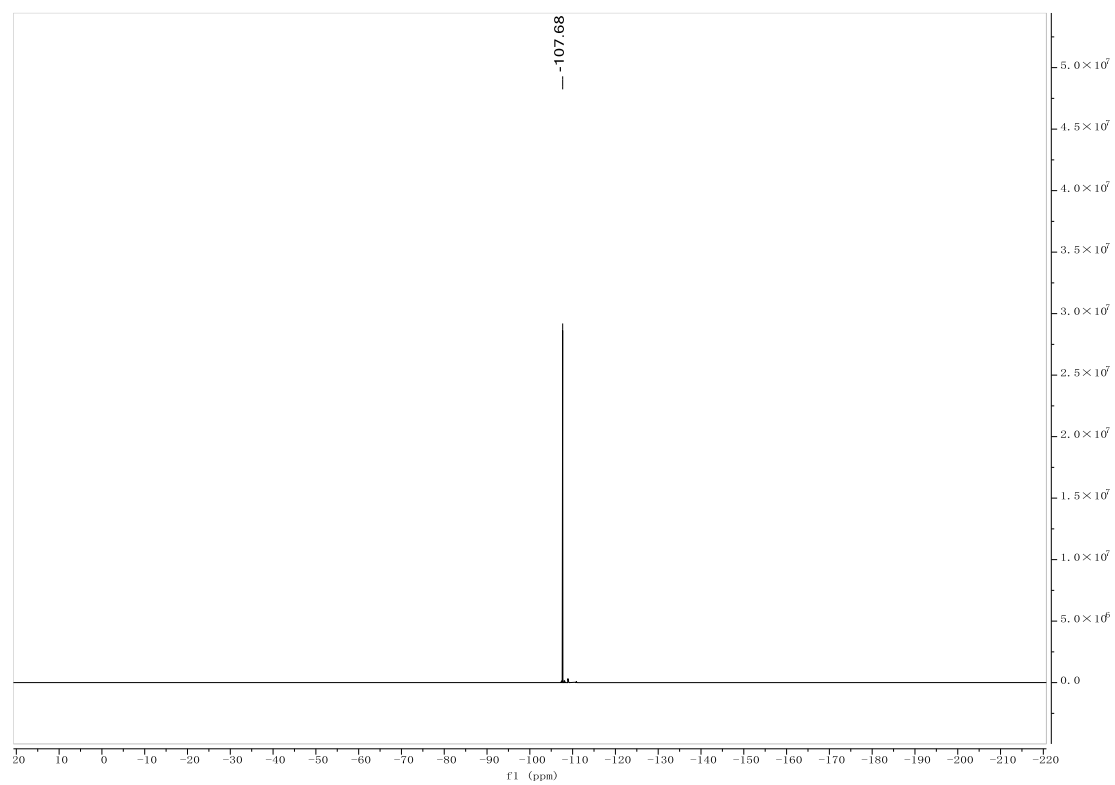

**<sup>1</sup>H NMR (400 MHz, CDCl<sub>3</sub>) of compound 3ha**

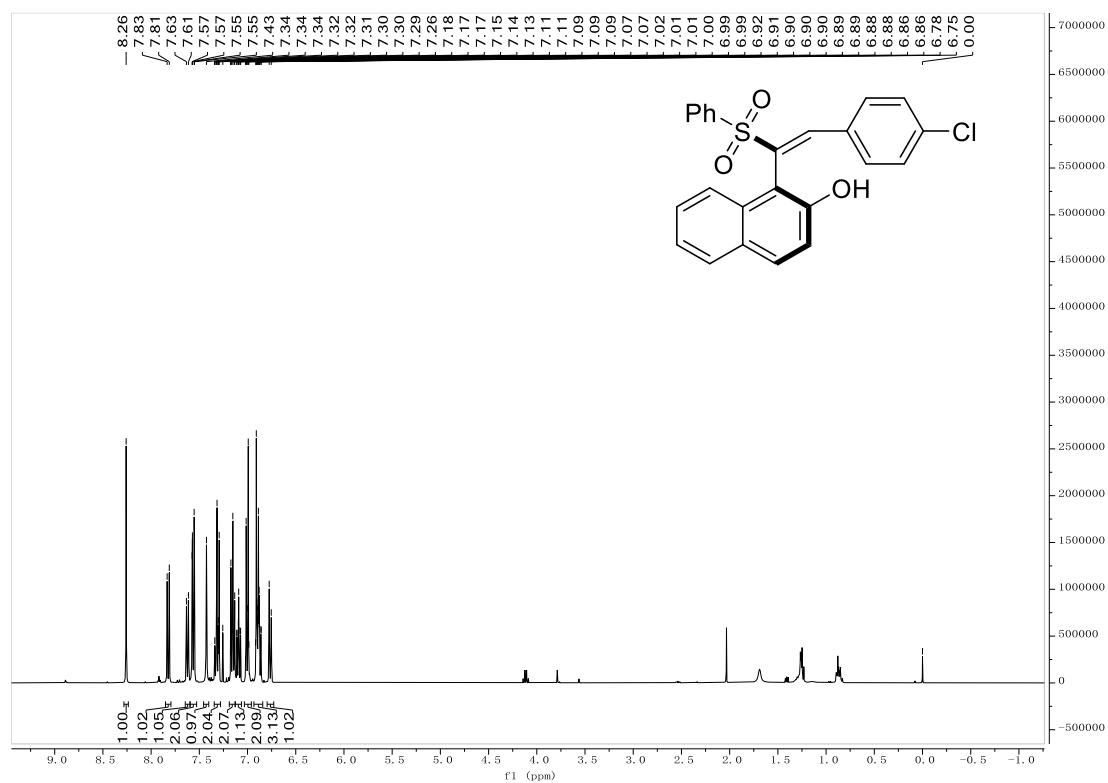

**<sup>13</sup>C NMR (101 MHz, CDCl<sub>3</sub>) of compound 3ha**

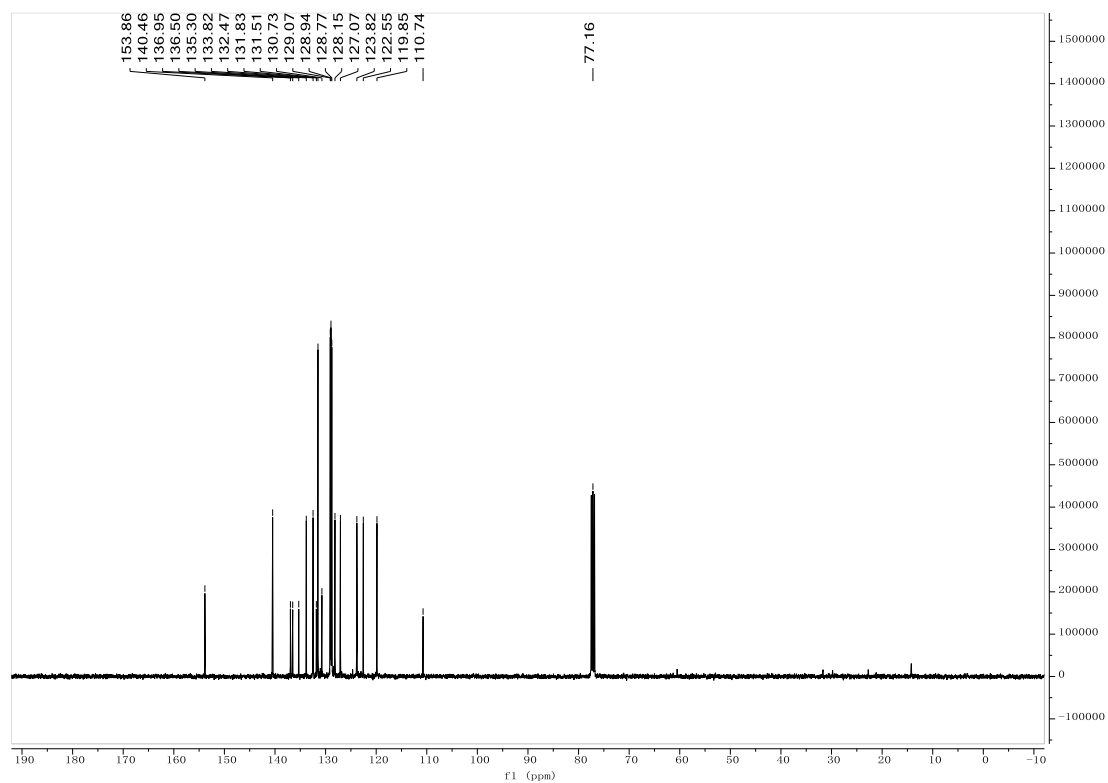

<sup>1</sup>H NMR (400 MHz, CDCl<sub>3</sub>) of compound **3ia**

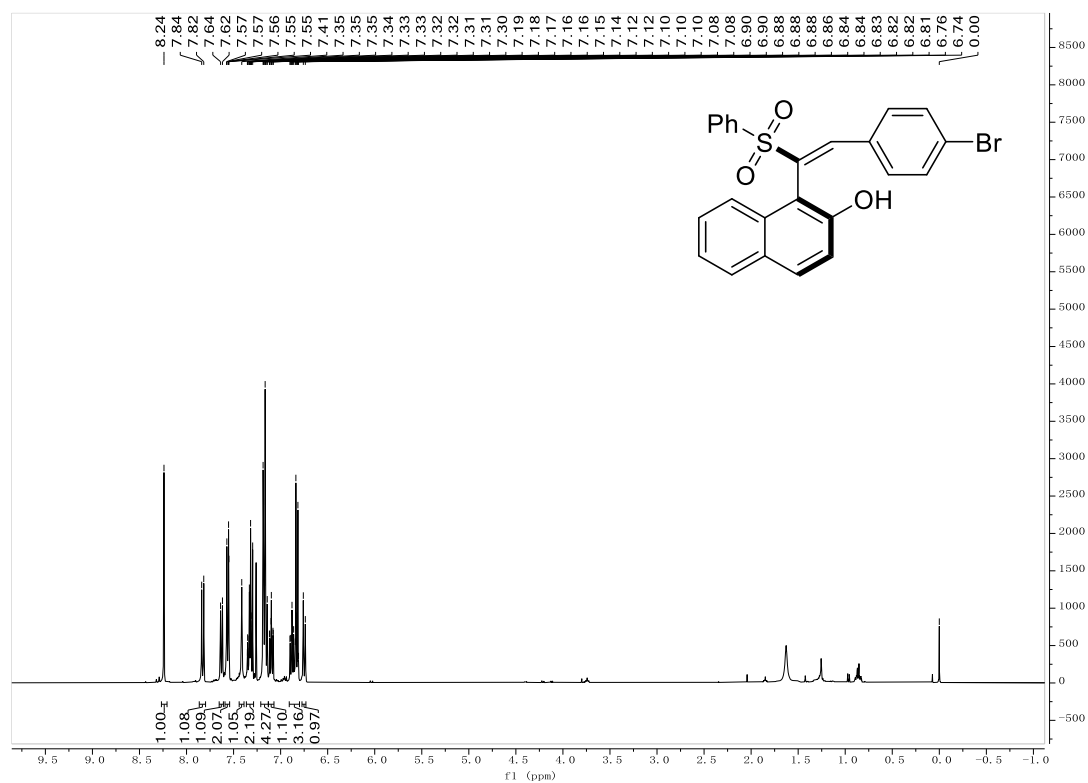

<sup>13</sup>C NMR (101 MHz, CDCl<sub>3</sub>) of compound **3ia**

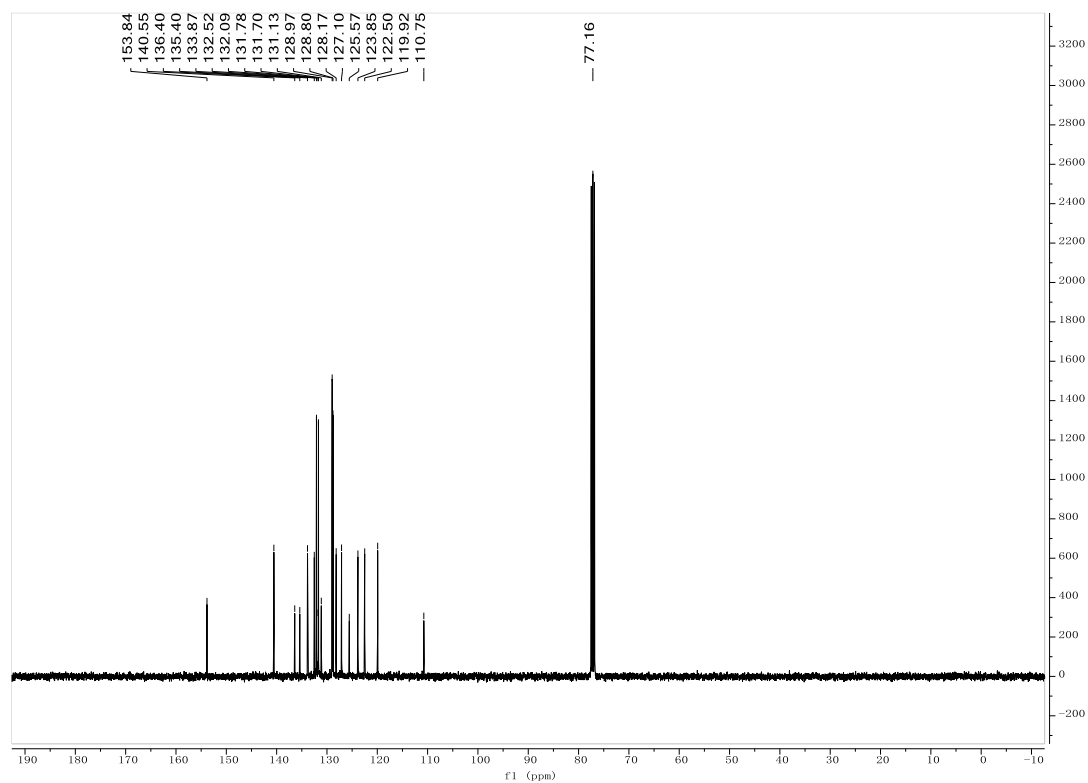

**<sup>1</sup>H NMR (400 MHz, CDCl<sub>3</sub>) of compound 3ja**

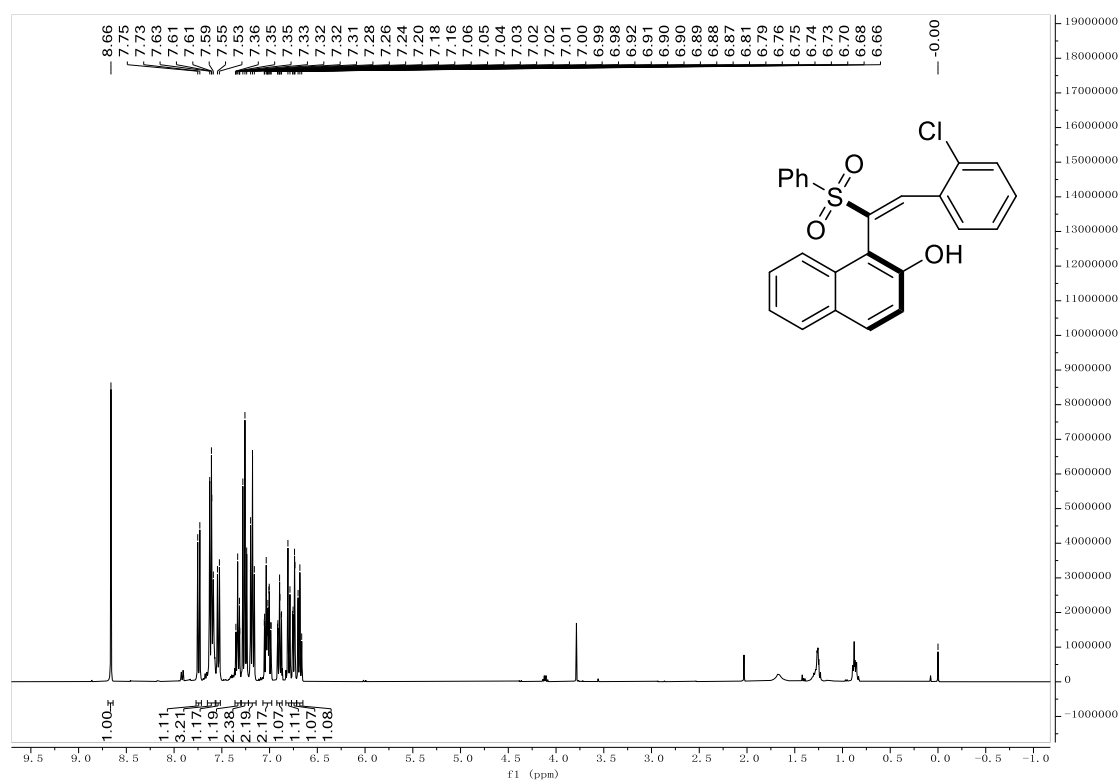

**<sup>13</sup>C NMR (101 MHz, CDCl<sub>3</sub>) of compound 3ja**

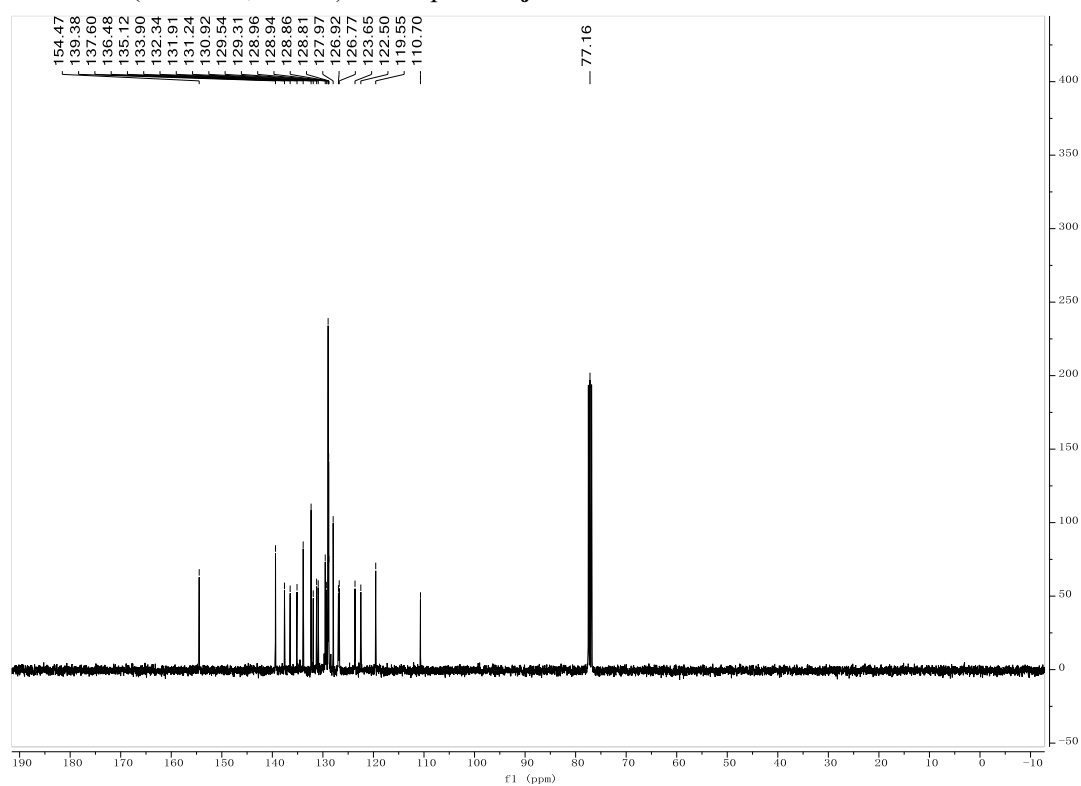



**<sup>1</sup>H NMR (400 MHz, CDCl<sub>3</sub>) of compound 3ka**

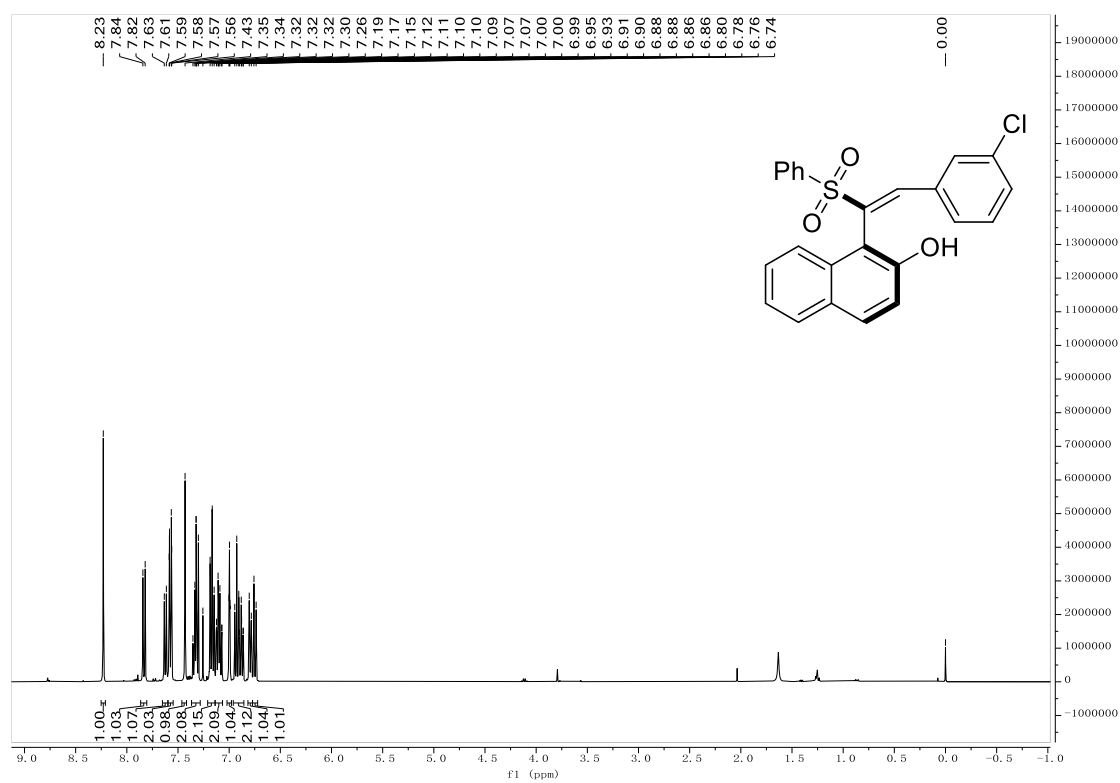

**<sup>13</sup>C NMR (101 MHz, CDCl<sub>3</sub>) of compound 3ka**

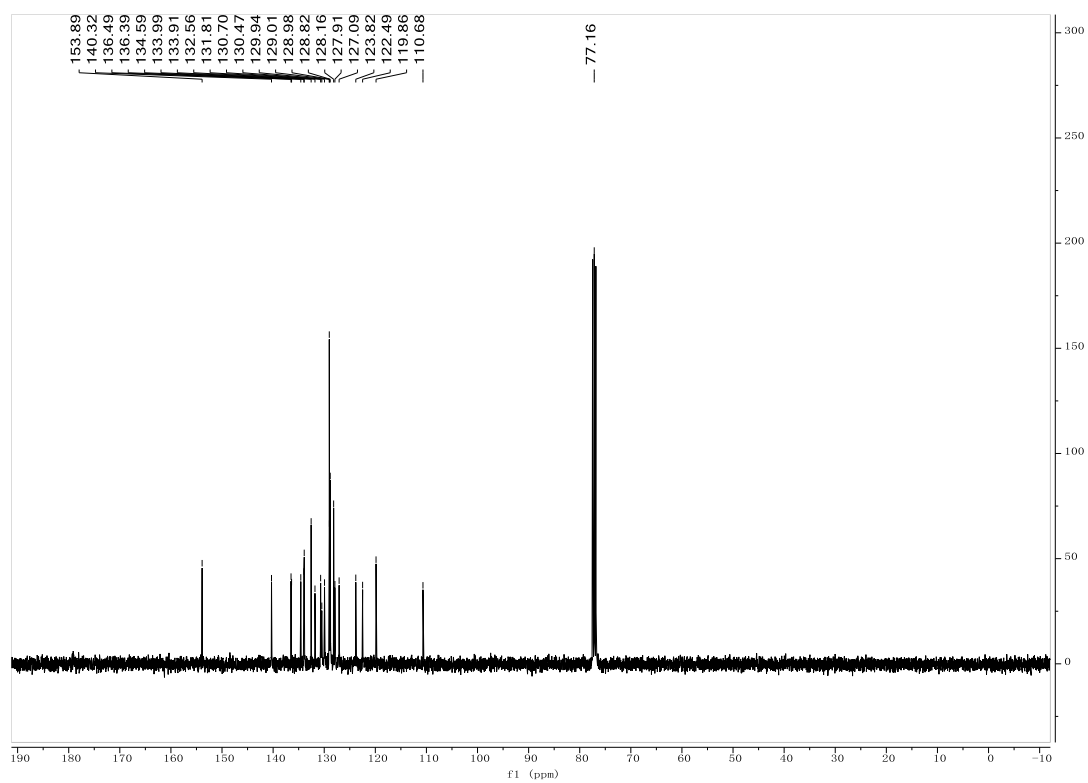

<sup>1</sup>H NMR (400 MHz, CDCl<sub>3</sub>) of compound 31a

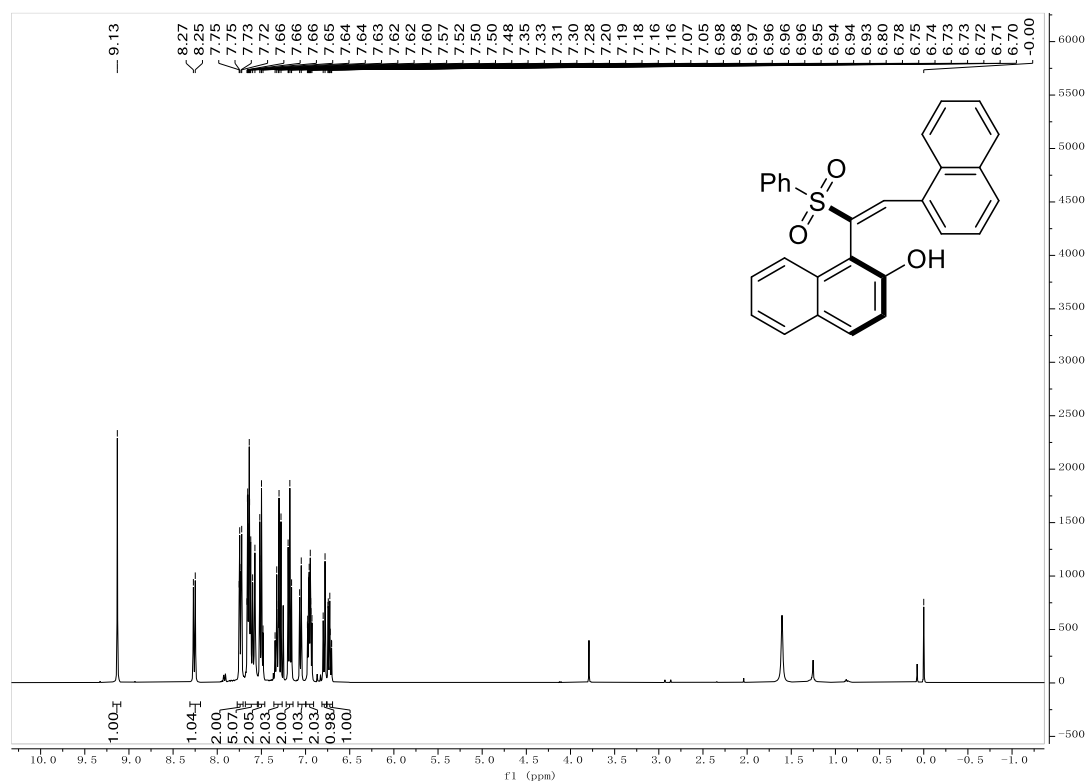

<sup>13</sup>C NMR (101 MHz, CDCl<sub>3</sub>) of compound 31a

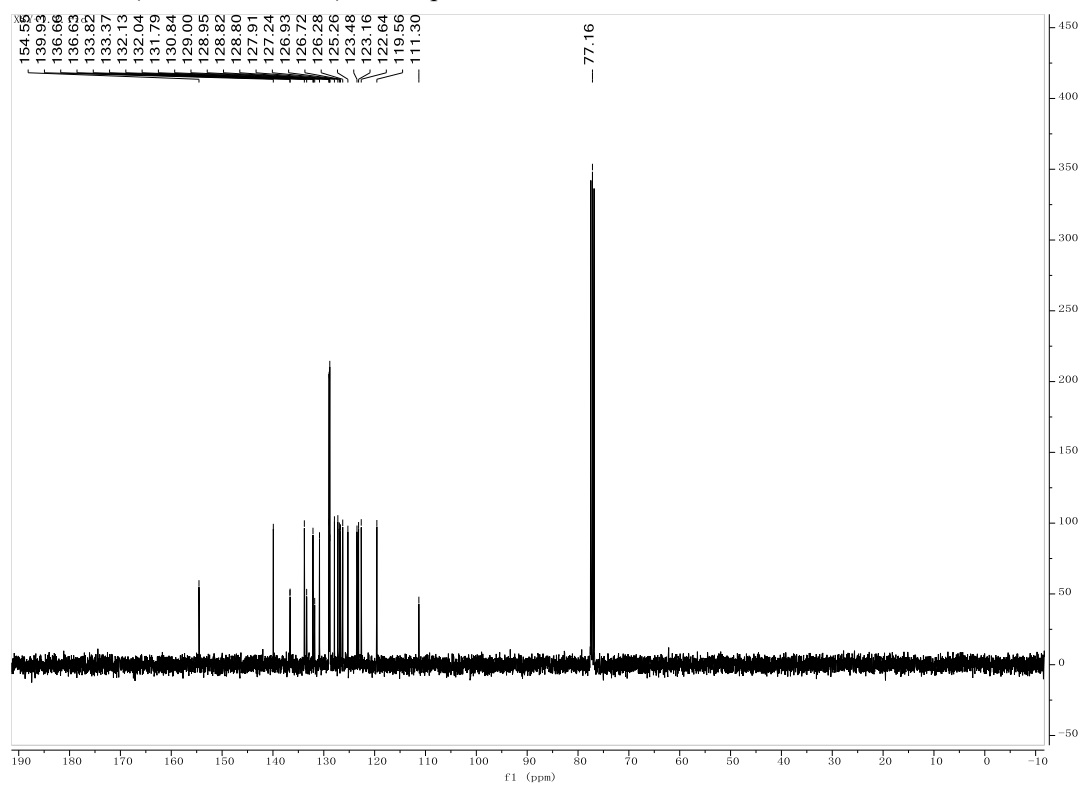

<sup>1</sup>H NMR (400 MHz, CDCl<sub>3</sub>) of compound **3ma**

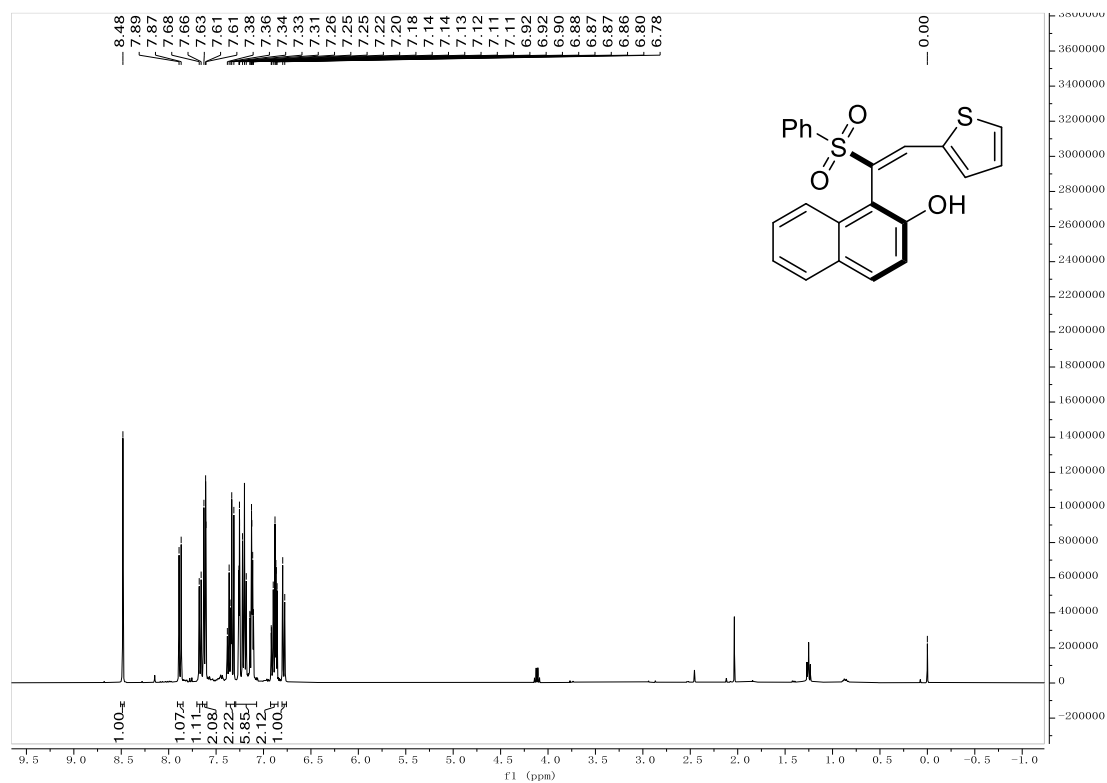

<sup>13</sup>C NMR (101 MHz, CDCl<sub>3</sub>) of compound **3ma**

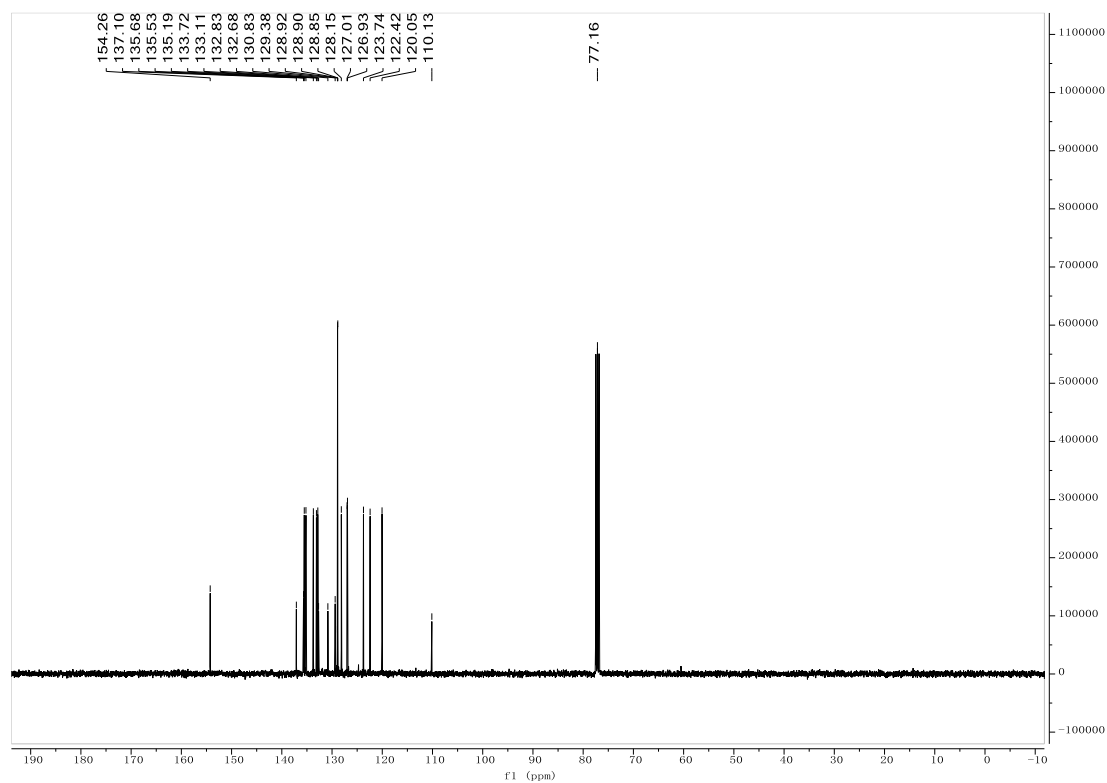

**<sup>1</sup>H NMR (400 MHz, CDCl<sub>3</sub>) of compound 3na**

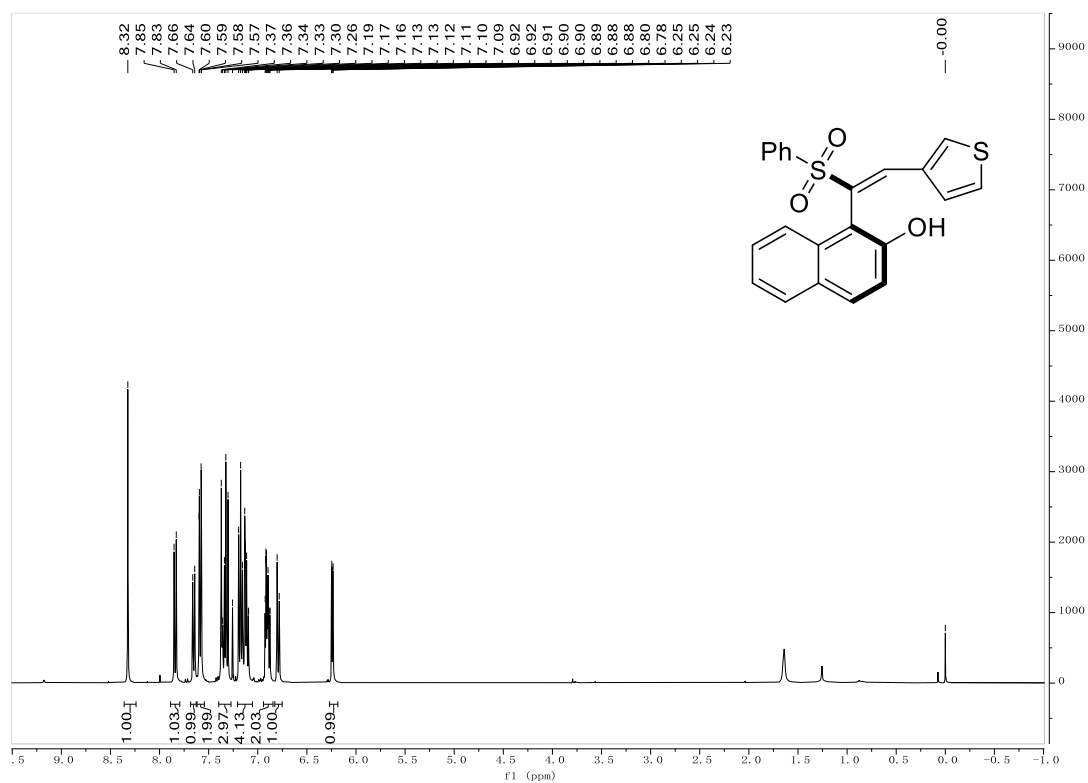

**<sup>13</sup>C NMR (101 MHz, CDCl<sub>3</sub>) of compound 3na**

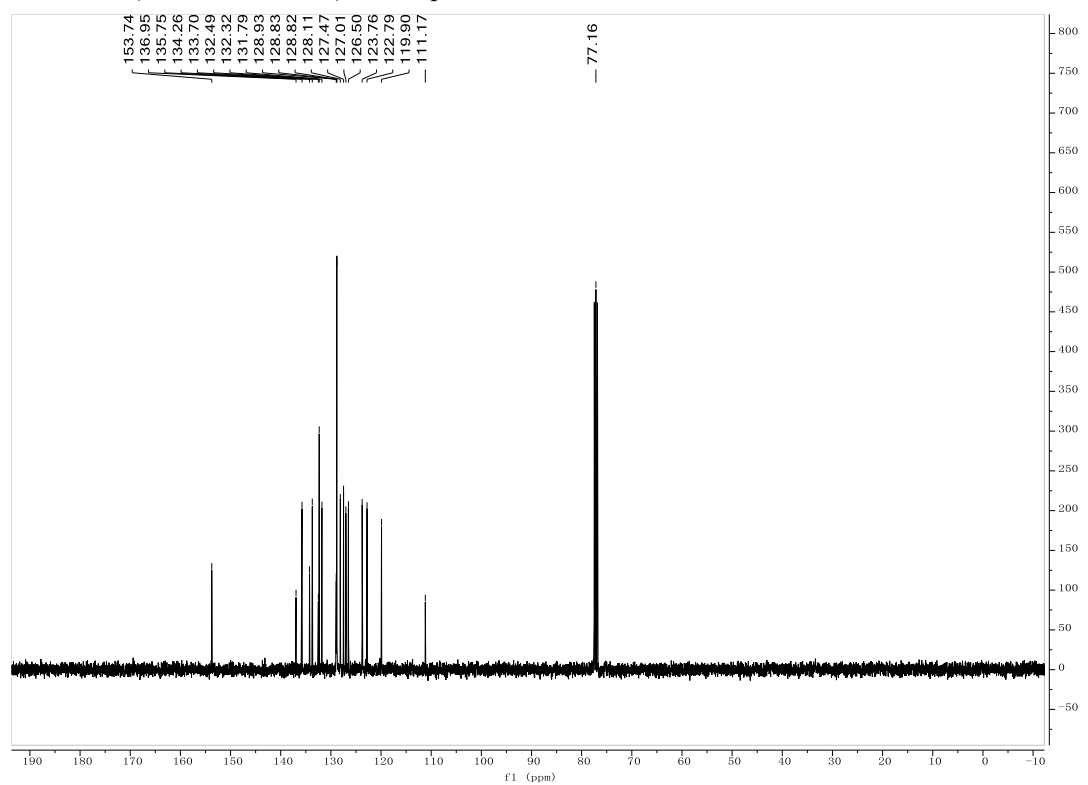

<sup>1</sup>H NMR (400 MHz, CDCl<sub>3</sub>) of compound **3oa**

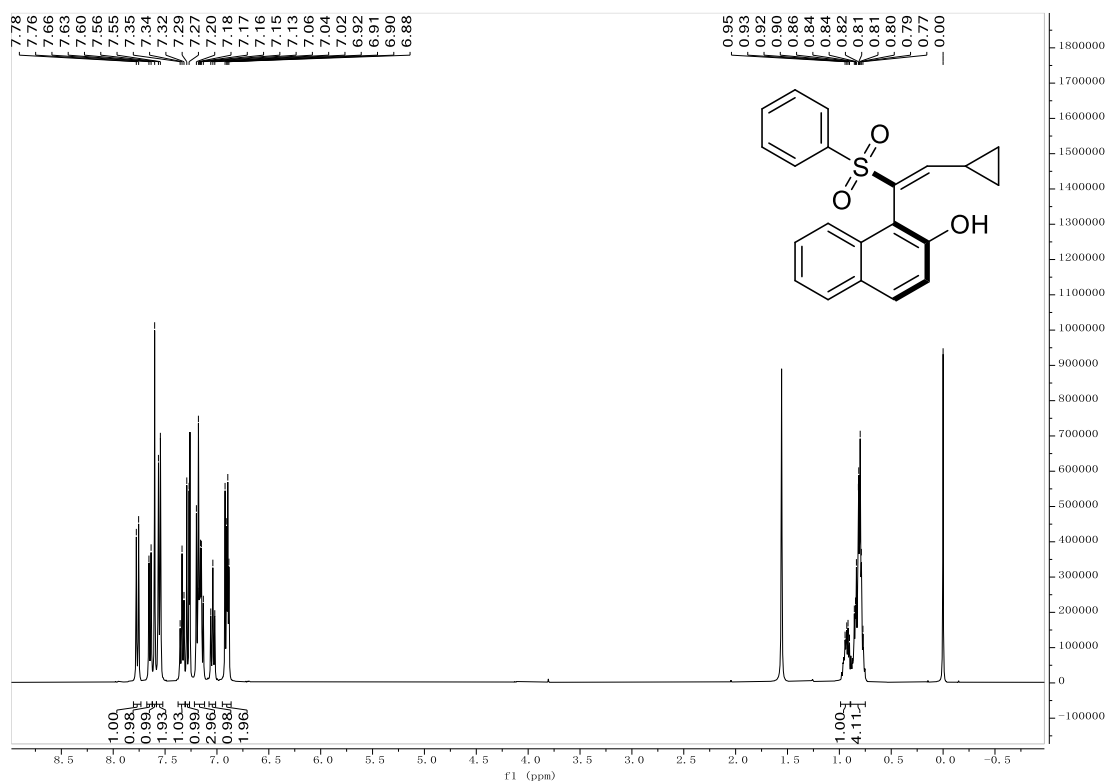

<sup>13</sup>C NMR (101 MHz, CDCl<sub>3</sub>) of compound **3oa**

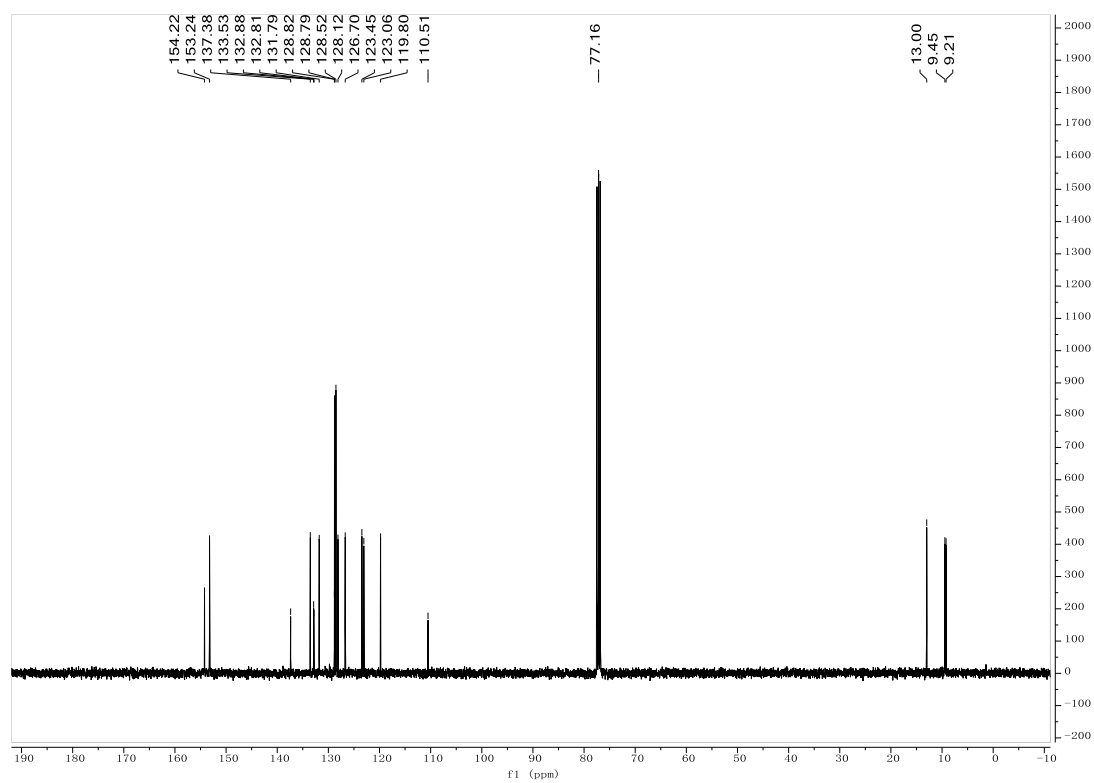

**<sup>1</sup>H NMR (400 MHz, CDCl<sub>3</sub>) of compound 3pa**

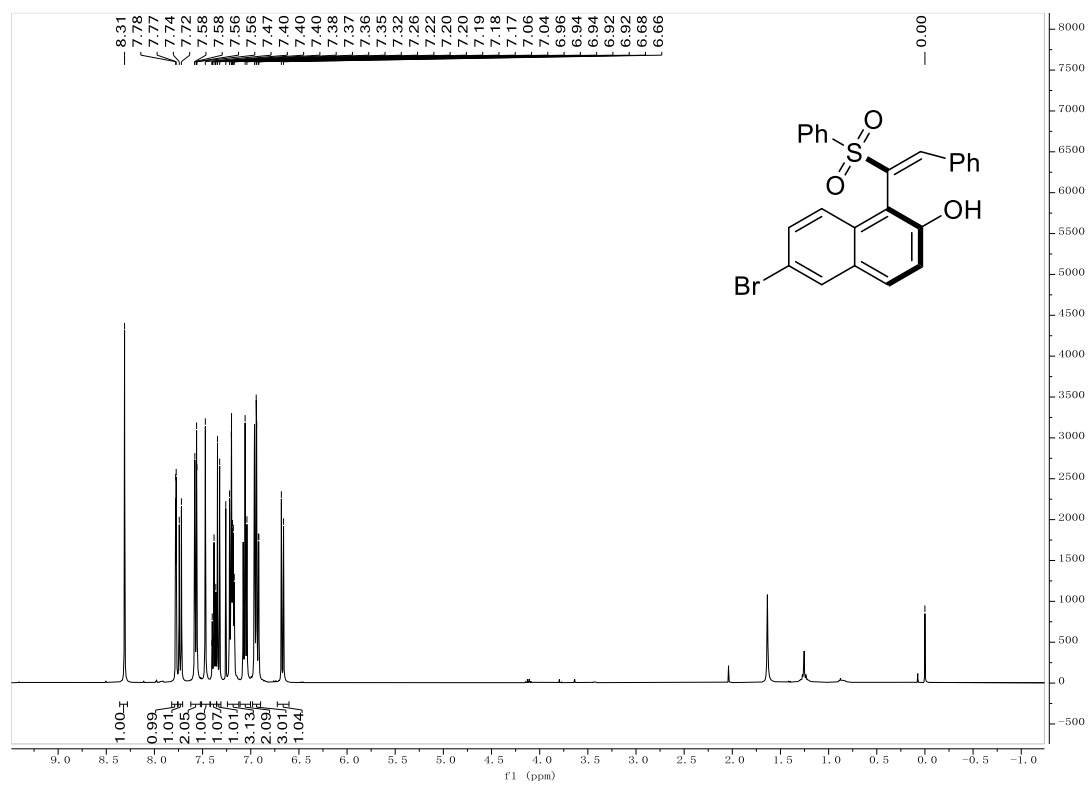

**<sup>13</sup>C NMR (101 MHz, CDCl<sub>3</sub>) of compound 3pa**

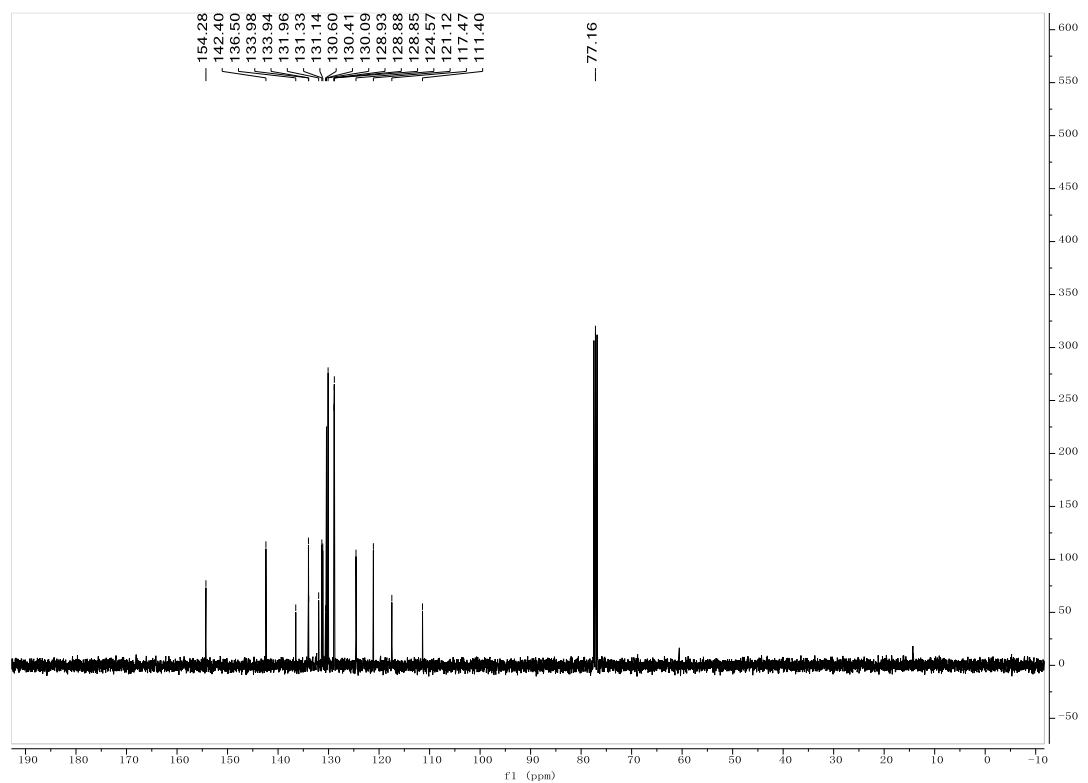

**<sup>1</sup>H NMR (400 MHz, CDCl<sub>3</sub>) of compound 3pg**

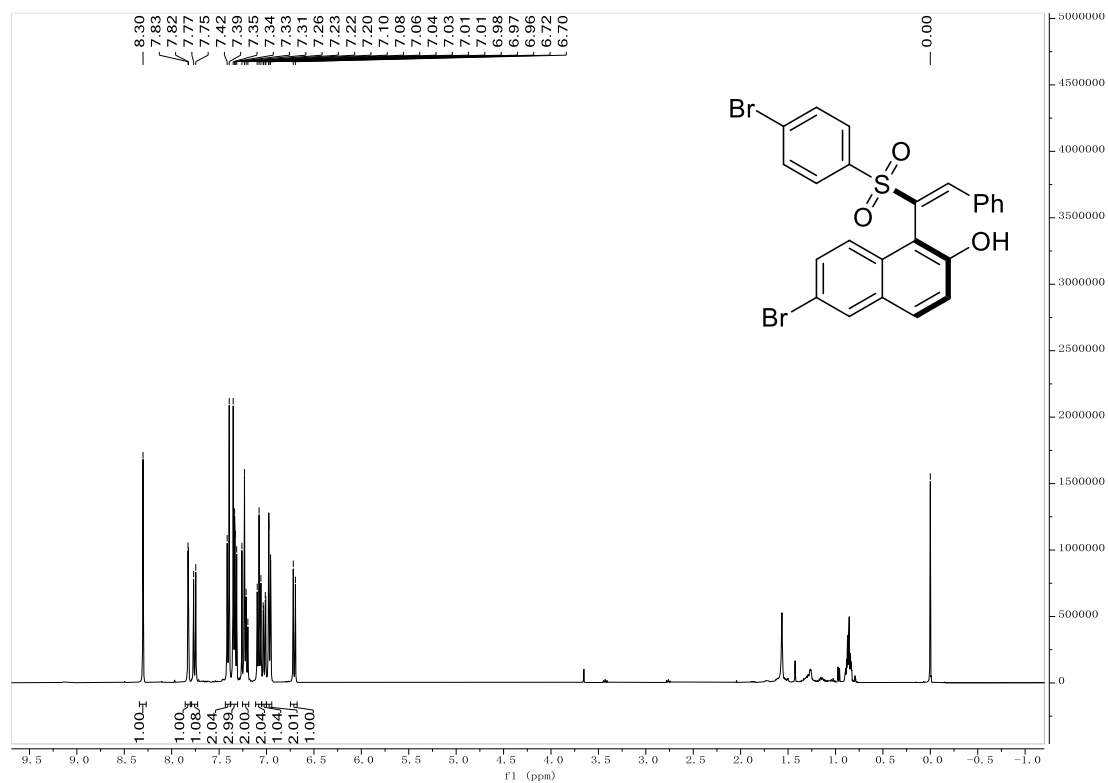

**<sup>13</sup>C NMR (101 MHz, CDCl<sub>3</sub>) of compound 3pg**

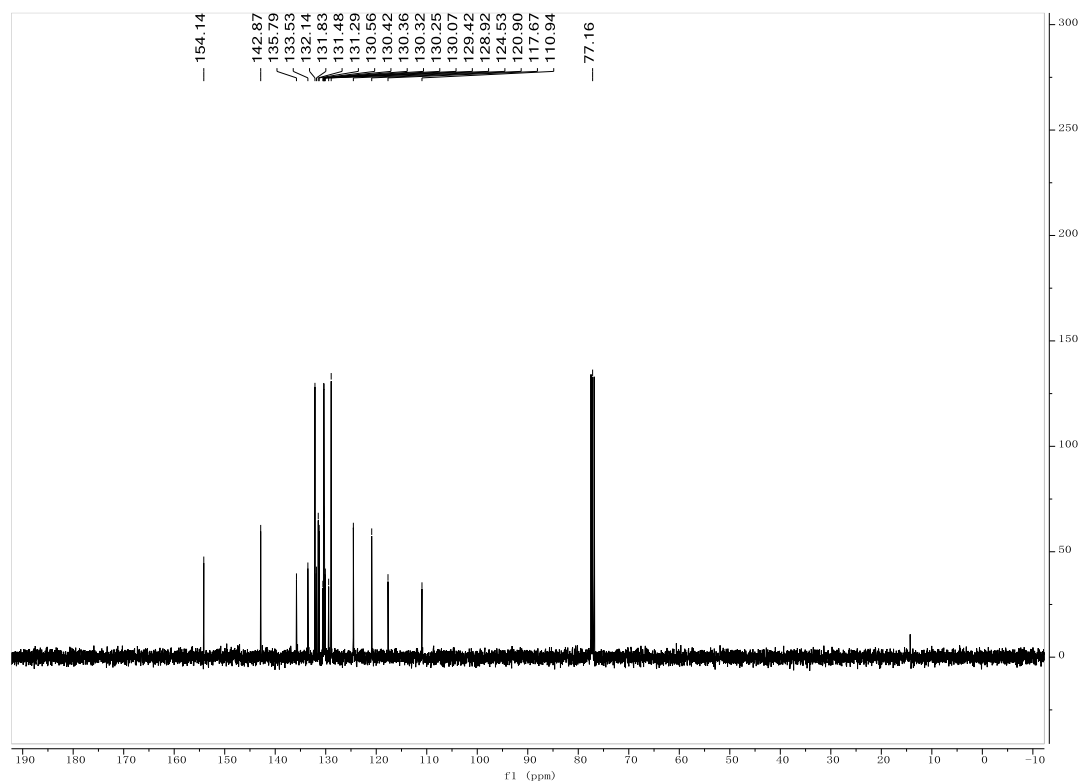

**<sup>1</sup>H NMR (400 MHz, CDCl<sub>3</sub>) of compound 3ph**

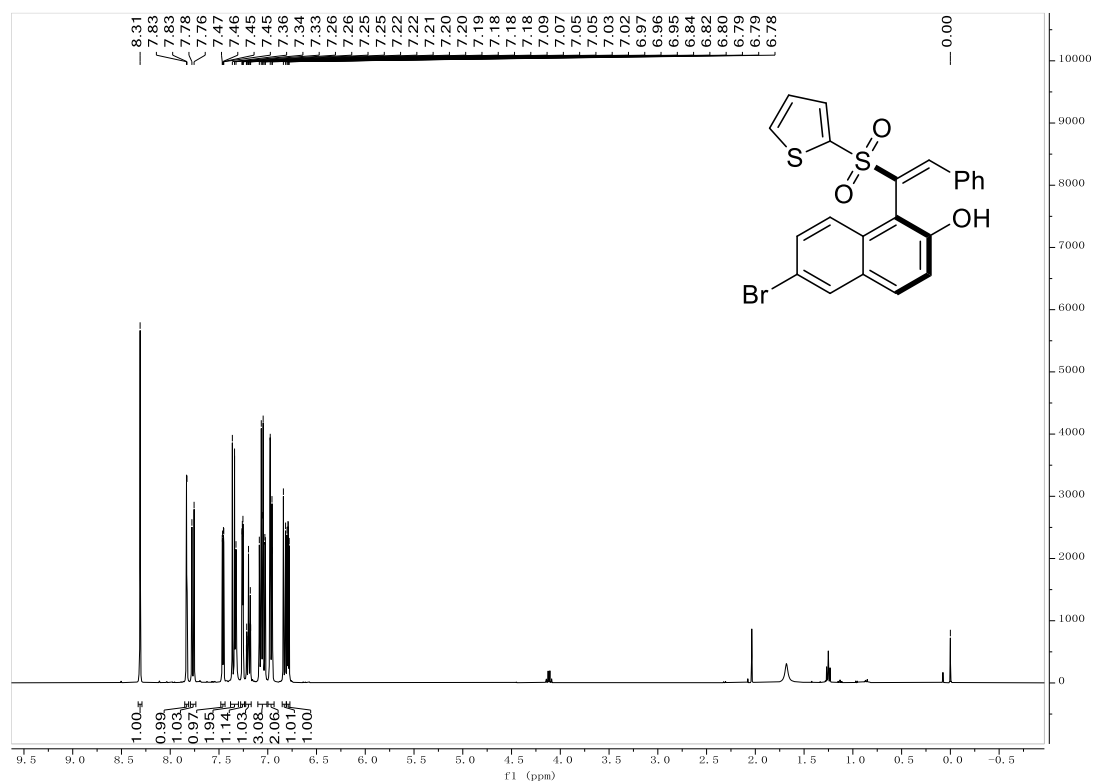

**<sup>13</sup>C NMR (101 MHz, CDCl<sub>3</sub>) of compound 3ph**

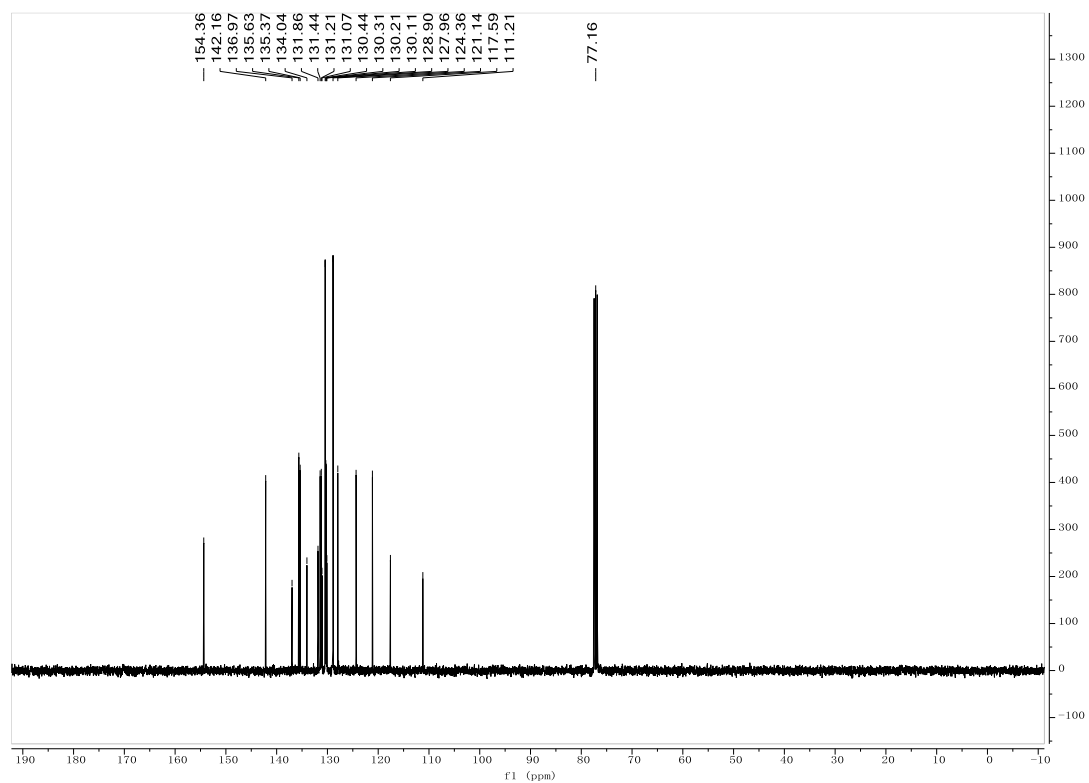



**<sup>1</sup>H NMR (400 MHz, CDCl<sub>3</sub>) of compound 3ng**

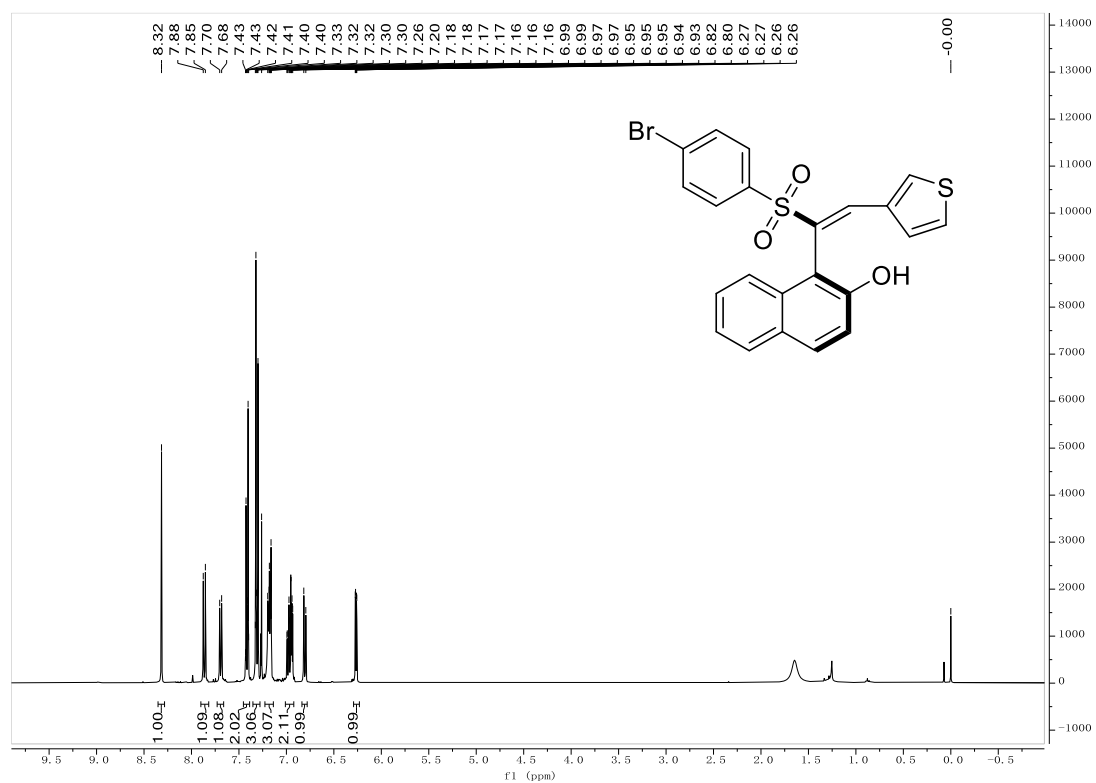

**<sup>13</sup>C NMR (101 MHz, CDCl<sub>3</sub>) of compound 3ng**

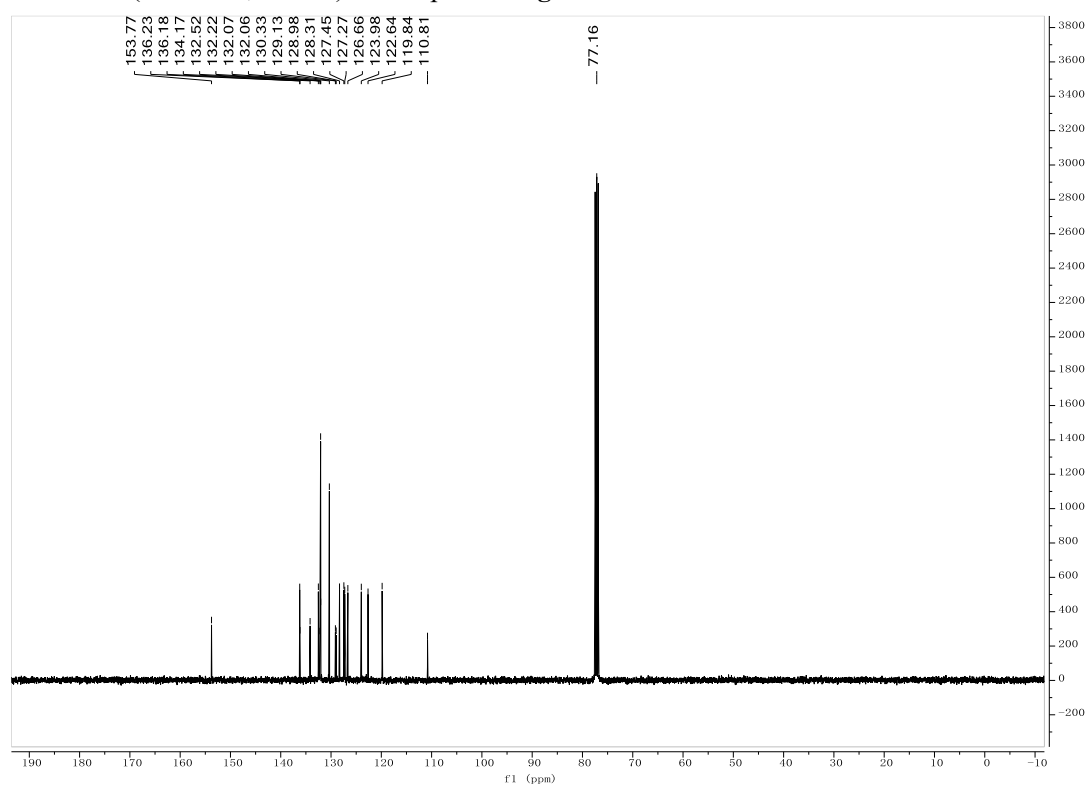

**<sup>1</sup>H NMR (400 MHz, CDCl<sub>3</sub>) of compound 3nh**

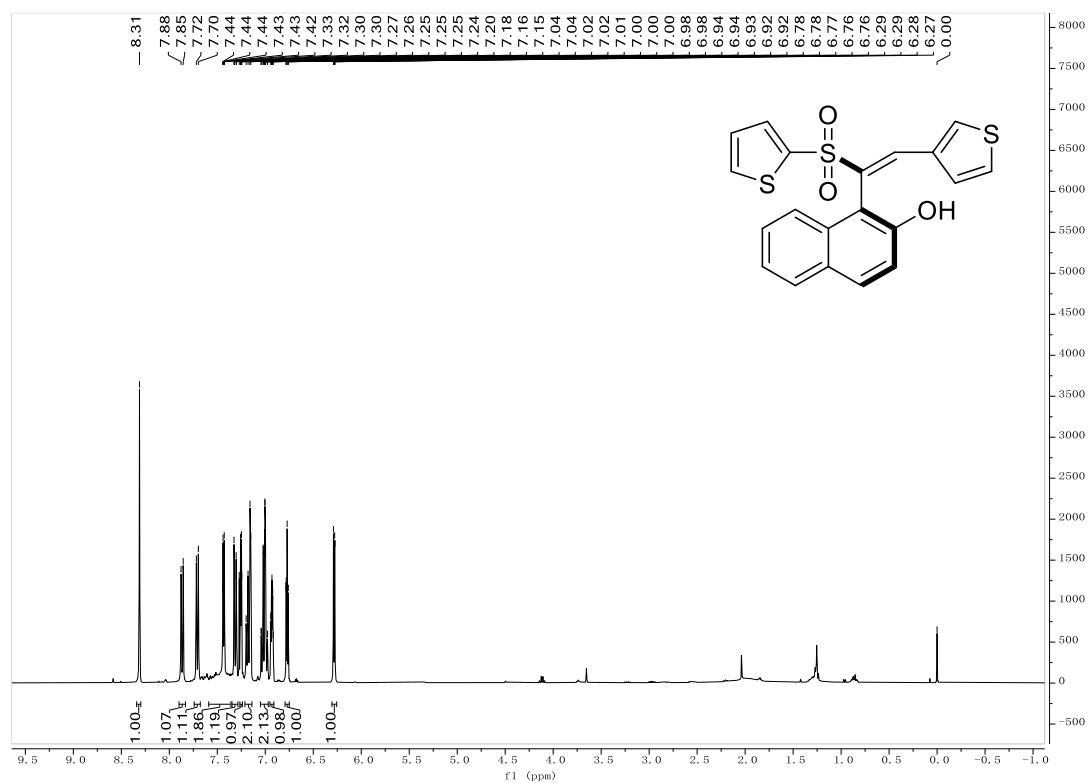

**<sup>13</sup>C NMR (101 MHz, CDCl<sub>3</sub>) of compound 3nh**

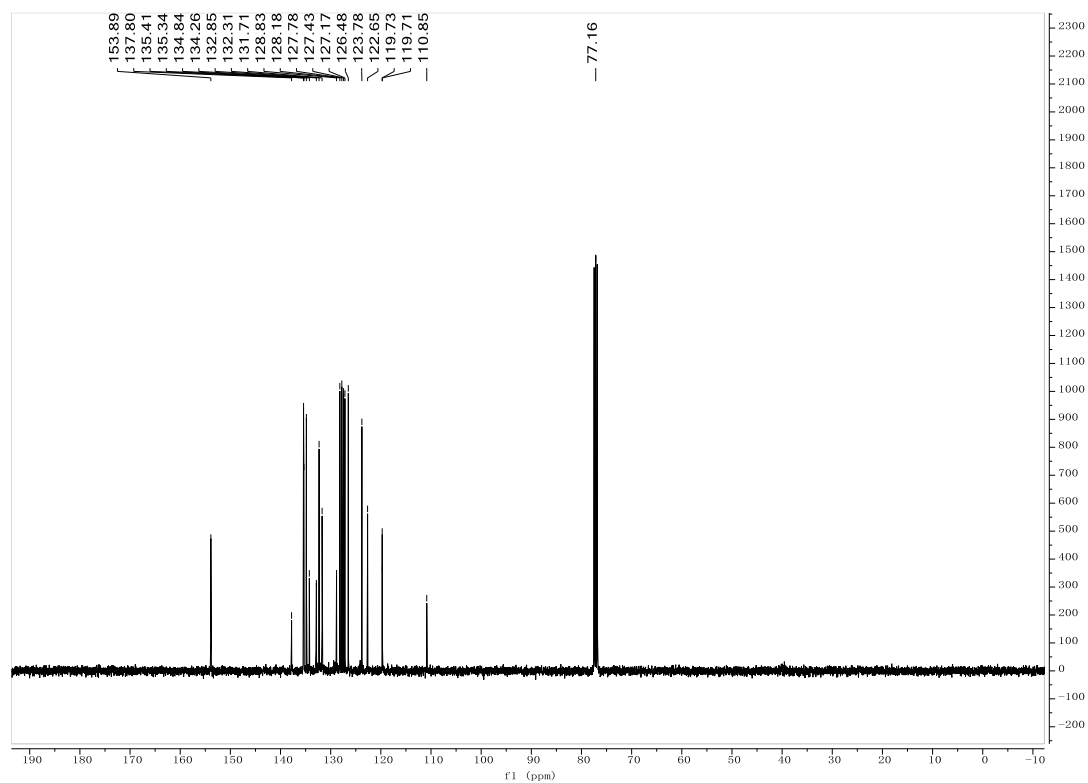

**<sup>1</sup>H NMR (400 MHz, CDCl<sub>3</sub>) of compound 3qh**

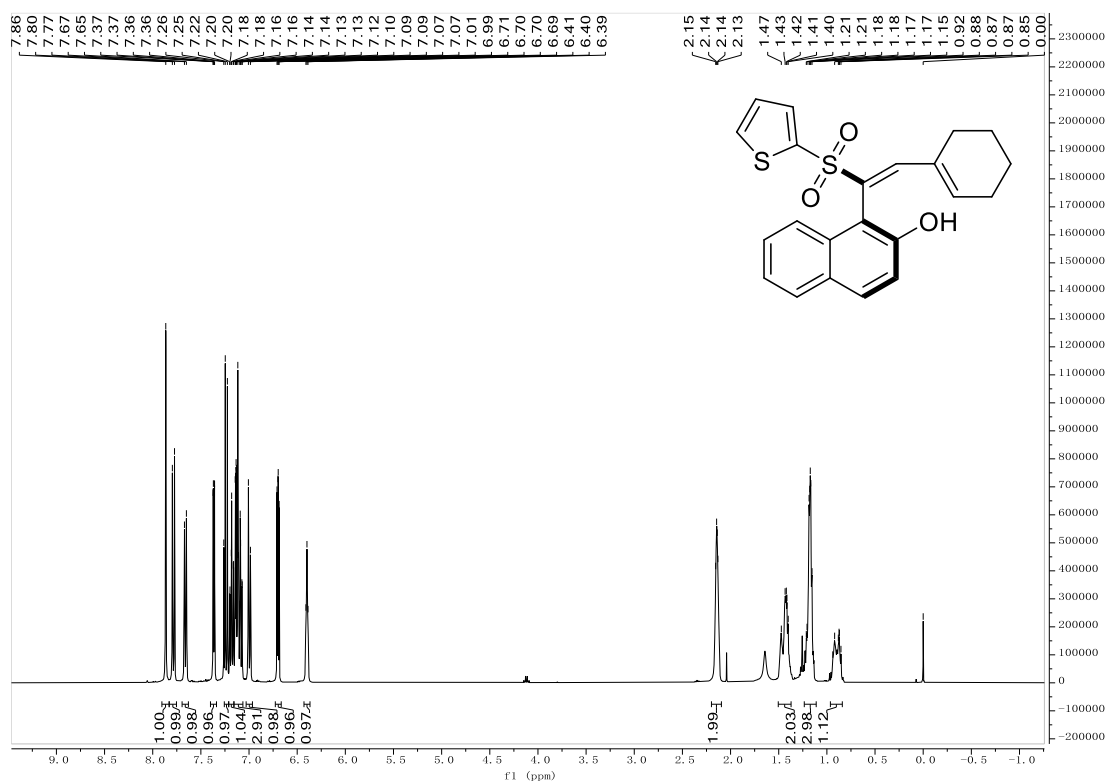

**<sup>13</sup>C NMR (101 MHz, CDCl<sub>3</sub>) of compound 3qh**

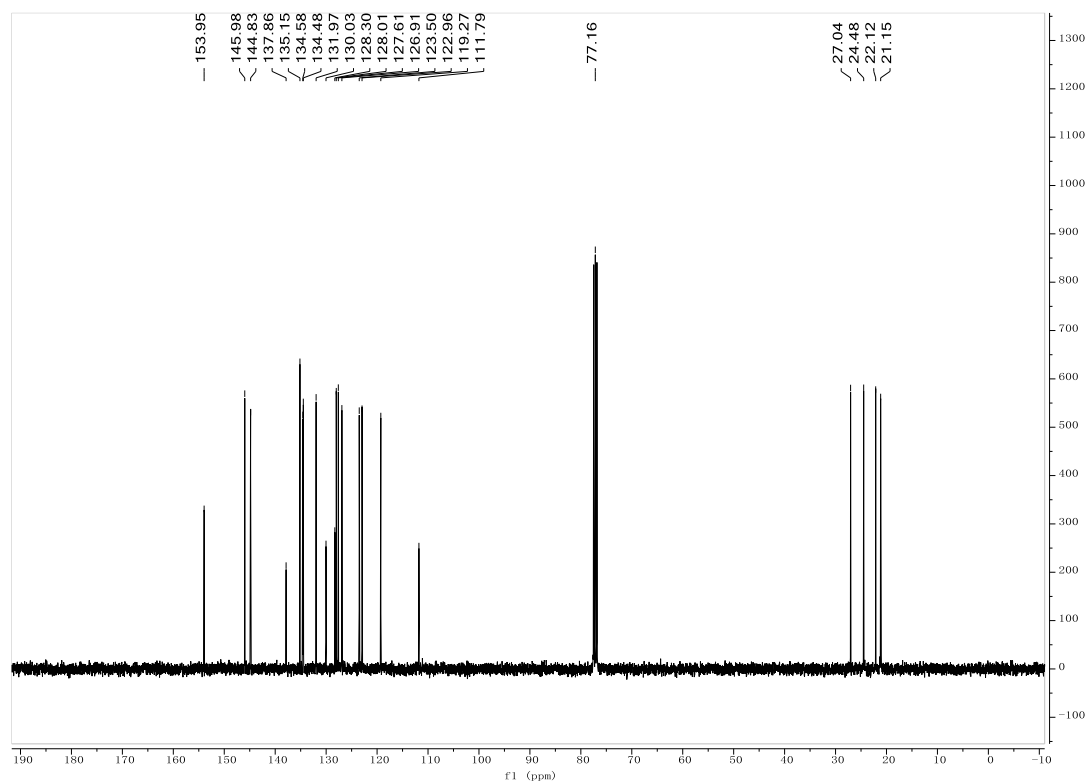

<sup>1</sup>H NMR (400 MHz, DMSO) of compound 4

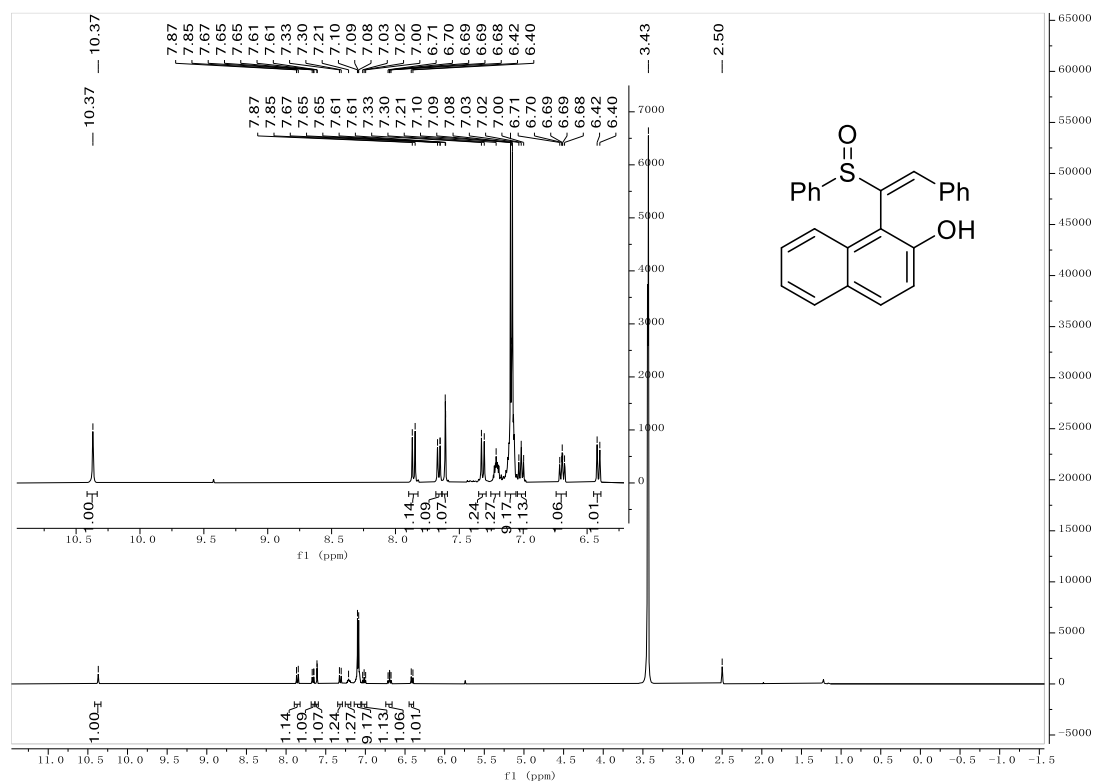

<sup>13</sup>C NMR (101 MHz, DMSO) of compound 4

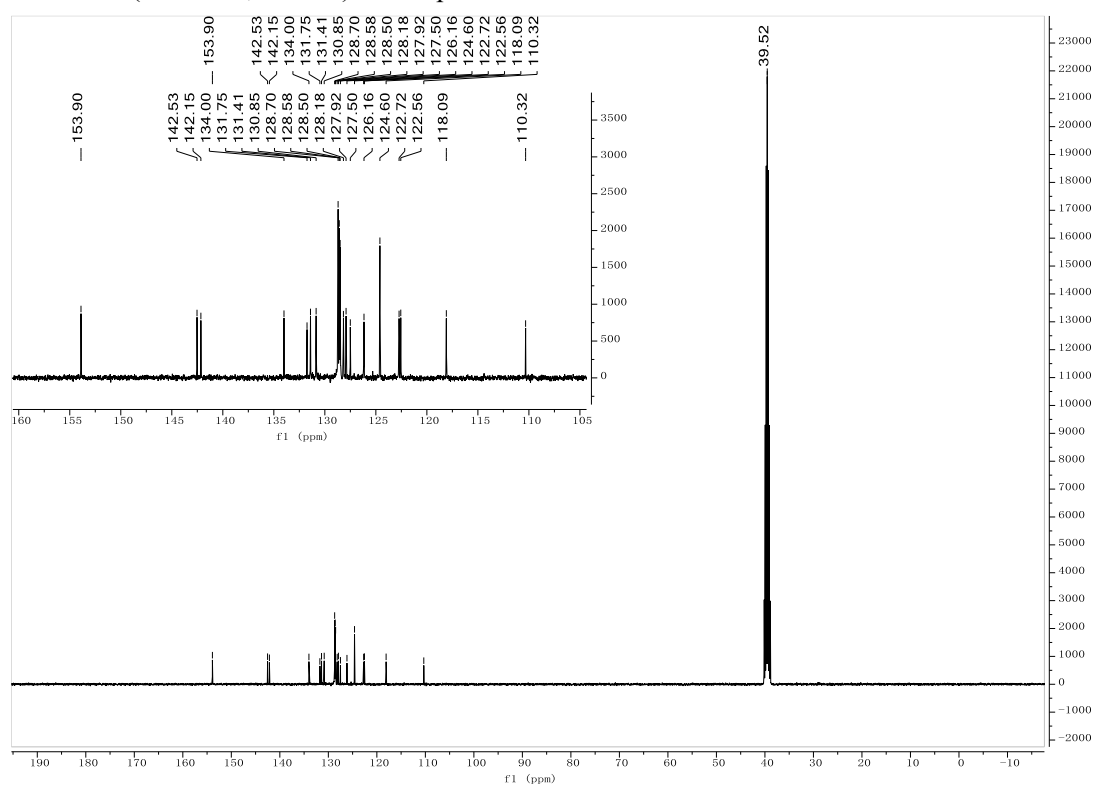

**<sup>1</sup>H NMR (400 MHz, CDCl<sub>3</sub>) of compound 5**

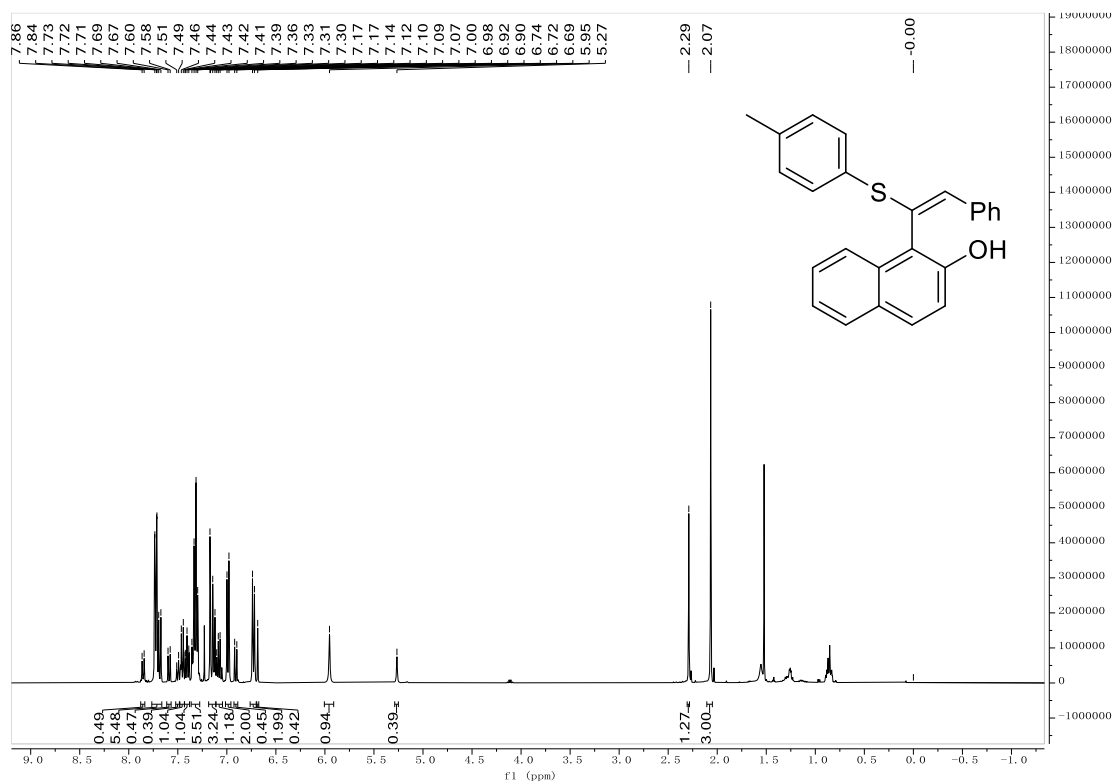

**<sup>13</sup>C NMR (101 MHz, CDCl<sub>3</sub>) of compound 5**

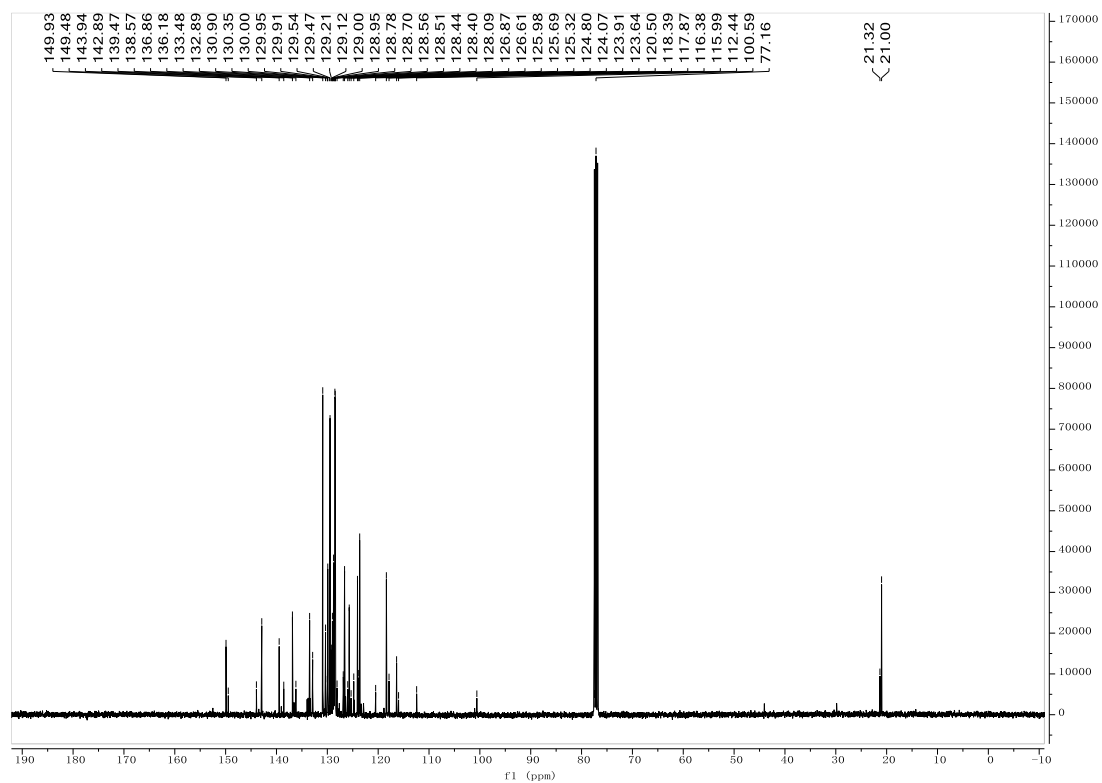

## 9. References.

1. S. Huang, Z. Chen, H. Mao, F. Hu, D. Li, Y. Tan, F. Yang and W. Qin, Metal-free difunctionalization of alkynes to access tetrasubstituted olefins through spontaneous selenosulfonylation of vinylidene ortho-quinone methide (VQM), *Organic & Biomolecular Chemistry*, 2019, **17**, 1121-1129.
2. W.-T. Guo, B.-H. Zhu, Y. Chen, J. Yang, P.-C. Qian, C. Deng, L.-W. Ye and L. Li, Enantioselective Rh-Catalyzed Azide-Internal-Alkyne Cycloaddition for the Construction of Axially Chiral 1,2,3-Triazoles, *Journal of the American Chemical Society*, 2022, **144**, 6981-6991.
3. L. Zeng, J. Li and S. Cui, Rhodium-Catalyzed Atroposelective Click Cycloaddition of Azides and Alkynes, *Angew. Chem. Int. Ed.*, 2022, **61**, e202205037.
4. S. Jia, Z. Chen, N. Zhang, Y. Tan, Y. Liu, J. Deng and H. Yan, Organocatalytic Enantioselective Construction of Axially Chiral Sulfone-Containing Styrenes, *J. Am. Chem. Soc.*, 2018, **140**, 7056-7060.
5. S. Banerjee, L. Adak and B. C. Ranu, Ionic liquid/PPh<sub>3</sub> promoted cleavage of diphenyl disulfide and diselenide: a straight-forward metal-free one-pot route to the synthesis of unsymmetrical sulfides and selenides, *Tetrahedron Lett.*, 2012, **53**, 2149-2152.
6. Y. Chen, S. Wen, Q. Tian, Y. Zhang and G. Cheng, Transition Metal-Free C–H Thiolation via Sulfonium Salts Using  $\beta$ -Sulfinylesters as the Sulfur Source, *Org. Lett.*, 2021, **23**, 7905-7909.
7. L. Zong, X. Ban, C. W. Kee and C.-H. Tan, Catalytic Enantioselective Alkylation of Sulfenate Anions to Chiral Heterocyclic Sulfoxides Using Halogenated Pentanidium Salts, *Angewandte Chemie International Edition*, 2014, **53**, 11849-11853.
8. J. Yang, S. Liu, J.-F. Zheng and J. Zhou, Room-Temperature Suzuki–Miyaura Coupling of Heteroaryl Chlorides and Tosylates, *Eur. J. Org. Chem.*, 2012, **2012**, 6248-6259.
9. R. V. Kupwade, S. S. Khot, U. P. Lad, U. V. Desai and P. P. Wadgaonkar, Catalyst-free oxidation of sulfides to sulfoxides and diethylamine catalyzed oxidation of sulfides to sulfones using Oxone as an oxidant, *Res. Chem. Intermed.*, 2017, **43**, 6875-6888.
10. A. V. Kalyanakrishnan, A. Joshy, A. K. Arya and A. Kaliyamoorthy, Synthesis of Various  $\alpha$ -Substituted Alkenyl Sulfoxides from Alkynes and  $\beta$ -Sulfinyl Esters, *ChemistrySelect*, 2021, **6**, 14054-14059.
11. Q. Wei, R. Pötzsch, X. Liu, H. Komber, A. Kiriya, B. Voit, P.-A. Will, S. Lenk and S. Reineke, Hyperbranched Polymers with High Transparency and Inherent High Refractive Index for Application in Organic Light-Emitting Diodes, *Adv. Funct. Mater.*, 2016, **26**, 2545-2553.
